# Supplementary material for: Catalytic N-methyl amidation of carboxylic acids under cooperative conditions
Source: Royal Society of Chemistry journal article supplement (doi:10.1039/d2ra03255d), 2022-01-01

## *Supporting Information*

### **Catalytic N-methyl Amidation of Carboxylic Acids under Cooperative Conditions**

Li Yingxian,<sup>‡,†</sup> Chen Wei,<sup>‡,†</sup> Zhao Linchun,<sup>†</sup> Zhang Ji-Quan,<sup>†</sup> Zhao Yonglong,<sup>†</sup> Li

Chun,<sup>†</sup> Guo Bing,<sup>#</sup> Tang Lei,<sup>\*,†</sup> Yang Yuan-Yong<sup>\*,†</sup>

<sup>†</sup>State Key Laboratory of Functions and Applications of Medicinal Plants, School of Pharmacy, Guizhou Provincial Engineering Technology Research Center for Chemical Drug R&D, Guizhou Medical University, 550014 Guiyang (P. R. China)

<sup>#</sup>Guizhou Provincial Key Laboratory of Pathogenesis and Drug Research on Common Chronic Diseases, Guizhou Medical University, 550004 Guiyang (P. R. China)

*E-mail:* [yangyuanyong@gmc.edu.cn](mailto:yangyuanyong@gmc.edu.cn); [2317972657@qq.com](mailto:2317972657@qq.com)

#### **Table of contents**

|                                                   |     |
|---------------------------------------------------|-----|
| 1. General Information                            | S2  |
| 2. General Procedure for Synthesis of <b>3</b>    | S3  |
| 3. The recovery of Fe <sub>3</sub> O <sub>4</sub> | S3  |
| 4. Comparison Table                               | S4  |
| 4. Spectroscopic Data for Products                | S6  |
| 5. <sup>1</sup> H and <sup>13</sup> C NMR Spectra | S22 |

**General Information:**

Proton nuclear magnetic resonance ( $^1\text{H}$  NMR) spectra and carbon nuclear magnetic resonance ( $^{13}\text{C}$  NMR) spectra were recorded on Bruker 400, 600 MHz spectrometer (400, 600 MHz and 100, 150 MHz). Chemical shifts ( $\delta$ ) for protons are reported in parts per million downfield from tetramethylsilane and are referenced to residual protium in the NMR solvent ( $\text{CDCl}_3$ : 7.26, DMSO: 2.50). Chemical shifts ( $\delta$ ) for carbon are reported in parts per million downfield from tetramethylsilane and are referenced to the carbon resonances of the solvent ( $\text{CDCl}_3$ : 77.0, DMSO: 39.51). Data are represented as follows: chemical shift, integration, multiplicity (br = broad, s = singlet, d = doublet, t = triplet, q = quartet, m = multiplet), coupling constants in Hertz (Hz). All high resolution mass spectra were obtained on a Waters G2-XSQTof mass spectrometer. Melting points were determined on a Tektronix X-4 melting point apparatus. Analytical TLC was performed using EM separations percolated silica gel 0.2 mm layer UV 254 fluorescent sheets.

**Starting Materials.** All solvents and inorganic reagents were from commercial sources and used without purification unless otherwise noted,  $\text{Fe}_3\text{O}_4$  powder was purchased from Shanghai Macklin Biochemical Co., Ltd and directly used for reaction.

### General Procedure for Synthesis of 3:

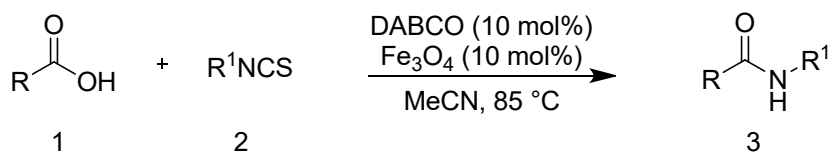

A solution of **1** (1 mmol, 1 eq), **2** (1.1 eq), DABCO (11.2 mg, 0.1 mmol) and Fe<sub>3</sub>O<sub>4</sub> (23.2 mg, 0.1 mmol) in 1 mL of MeCN for 48 hours at 85 °C until **1** was completely consumed (monitored by TLC). Upon completion, saturated aqueous NH<sub>4</sub>Cl solution was added, and the mixture was extracted with EtOAc. The organic layers were combined, washed with brine, dried over anhydrous Na<sub>2</sub>SO<sub>4</sub> and concentrated and purification by flash column chromatography on SiO<sub>2</sub> to give the final product.

### The recovery of Fe<sub>3</sub>O<sub>4</sub>:

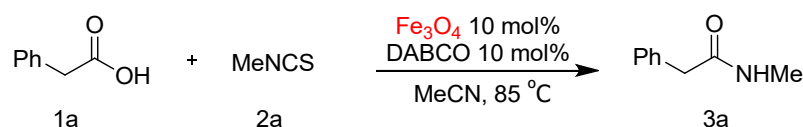

| cycles    | additive                       | time (h) | catalyst | yield | TON  | TOF  |
|-----------|--------------------------------|----------|----------|-------|------|------|
| <b>1</b>  | Fe <sub>3</sub> O <sub>4</sub> | 48       | DABCO    | 97.7% | 9.77 | 0.20 |
| <b>2</b>  | Fe <sub>3</sub> O <sub>4</sub> | 48       | DABCO    | 98.1% | 9.81 | 0.20 |
| <b>3</b>  | Fe <sub>3</sub> O <sub>4</sub> | 48       | DABCO    | 97.2% | 9.72 | 0.20 |
| <b>4</b>  | Fe <sub>3</sub> O <sub>4</sub> | 48       | DABCO    | 92.5% | 9.25 | 0.19 |
| <b>5</b>  | Fe <sub>3</sub> O <sub>4</sub> | 48       | DABCO    | 88.6% | 8.86 | 0.18 |
| <b>6</b>  | Fe <sub>3</sub> O <sub>4</sub> | 48       | DABCO    | 86.3% | 8.63 | 0.18 |
| <b>7</b>  | Fe <sub>3</sub> O <sub>4</sub> | 48       | DABCO    | 88.8% | 8.88 | 0.19 |
| <b>8</b>  | Fe <sub>3</sub> O <sub>4</sub> | 48       | DABCO    | 88.9% | 8.89 | 0.19 |
| <b>9</b>  | Fe <sub>3</sub> O <sub>4</sub> | 48       | DABCO    | 89.2% | 8.92 | 0.19 |
| <b>10</b> | Fe <sub>3</sub> O <sub>4</sub> | 48       | DABCO    | 86.6% | 8.66 | 0.18 |

<sup>a</sup> Reactions were run on 1 mmol **1a** and 1.1 mmol **2a** with 10 mol % DABCO and 10 mol % Fe<sub>3</sub>O<sub>4</sub> in 1 mL of MeCN at 85 °C for 48 hours unless otherwise noted.

## comparison table

| entry | substrate           | conditions                                                                                                                                                                                                                                 | Yield for %<br> | ref  | comparison                          |
|-------|---------------------|--------------------------------------------------------------------------------------------------------------------------------------------------------------------------------------------------------------------------------------------|---------------------------------------------------------------------------------------------------|------|-------------------------------------|
| 1     | Phenylacetic acid   | Phenylacetic acid 55 mmol, toluene 25 ML, thionyl chloride (66 mmol, 1.2 equiv), DMF(63 mmol, 1.14 equiv), methylamine solution (275 mmol, 5.0 equiv)                                                                                      | 96                                                                                                | 5, 9 | Additional SOCl <sub>2</sub> , TsCl |
| 2     | benzotrichloride    | [B12-TiO <sub>2</sub> ]=10 mg (B12, 2.28Ö10ç5m), [benzotrichloride]=3.0 mm, [amine]=90 mm, solvent=MeOH 6 mL under air at RT by UV light irradiation (black light, lmax=365 nm, 1.5 mWcmç2 at 10 Cm distance).                             | 90                                                                                                | 10   | Generate HCl, UV irradiation        |
| 3     | PhCN                | nitrile (0.5 mmol), CoBr <sub>2</sub> (7.5 mol %), tris[2-(diphenylphosphino)ethyl]phosphine (PP3) (7.5 mol %), Cs <sub>2</sub> CO <sub>3</sub> (0.5 mmol), KOtBu (0.25 mmol) and water (5.0 mmol) in methanol/m-xylene (2.5 mL, 1:1 v/v). | 89                                                                                                | 11   | Higher temperature                  |
| 4     | Benzaldehyde        | 1b (2mmol), 2n (0.5 mmol), TBHP (7.5 equiv), 120 °C, 48 h.                                                                                                                                                                                 | 71                                                                                                | 12   | External oxidant                    |
| 5     | Benzaldehyde        | N-Methylformamide (3.0 mmol), KO <sup>t</sup> Bu (3.0 mmol), THF (2.0 mL). benzaldehyde (1.0 mmol), 50 °C                                                                                                                                  | 39                                                                                                | 13   | Low yield                           |
| 6     | Phenylacetonitril e | 10mg of Ru/C and 10 mL of THF, nitriles (1 mmol), amines (1 mmol). stirred at 25-180 oC for 15-30 h in open air.                                                                                                                           | 91                                                                                                | 14   | HCN as byproduct                    |
| 7     | benzamide           | 1c (1.5 equiv), benzamide (0.2 mmol), CuI (5 mol%), and L1                                                                                                                                                                                 | 90                                                                                                | 15   |                                     |

|    |                                                                                                                         |                                                                                                                                                                                                                                                                                                                                                  |    |    |  |
|----|-------------------------------------------------------------------------------------------------------------------------|--------------------------------------------------------------------------------------------------------------------------------------------------------------------------------------------------------------------------------------------------------------------------------------------------------------------------------------------------|----|----|--|
|    |                                                                                                                         | (5 mol%), benzene.<br>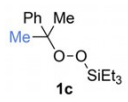<br><b>1c</b>                                                                                                                                                                                                                             |    |    |  |
| 8  | <br><b>1a</b>                          | lignin model (0.125 mmol),<br>copper acetate (0.0125 mmol),<br>amine or ammonia (5 equiv),<br>and DMSO (1 mL),<br>at 25 °C, under air.                                                                                                                                                                                                           | 89 | 16 |  |
| 9  |                                        | Aryl halides (0.5 mmol),<br>carbamoylsilane 2 (5, 6 or 7)<br>(0.60mmol) , 0.01 mmol of<br>[(Ph)3P]4Pd(0), 100 °C                                                                                                                                                                                                                                 | 81 | 17 |  |
| 10 | <br><b>1a</b> (1.3 equiv.) <b>2a-q</b> | FeCl <sub>2</sub> .4H <sub>2</sub> O (9.9 mg, 0.05<br>mmol, 10 mol%),<br>methylamine.HCl (67.8 mg, 0.5<br>mmol, 1 equiv.) and CaCO <sub>3</sub><br>(50.1 mg, 0.5 mmol, 1 equiv.).<br>1 mL of CH <sub>3</sub> CN, benzyl<br>alcohol (67 μL, 0.65 mmol, 1.3<br>equiv) and<br>tertbutylhydroperoxide<br>(70% in H <sub>2</sub> O, 140 μL, 2 equiv.) | 70 | 18 |  |
| 11 | Benzoic acid                                                                                                            | benzoic acid (1 mmol, 122 mg)<br>and amine (1 mmol, 0.09 mL)<br>nano-MgO (5 mmol%), 70 °C                                                                                                                                                                                                                                                        | 98 | 19 |  |
| 12 | Benzoic acid                                                                                                            | carboxylic acid (3 mmol), urea (6<br>mmol), Mg(NO <sub>3</sub> ) <sub>2</sub> ·6H <sub>2</sub> O (10<br>mol%), octane (3 mL), 130 C, 24 h.                                                                                                                                                                                                       | 0  | 20 |  |
| 13 | Benzoic acid                                                                                                            | Benzoic acid (1 mmol),<br>heterogeneous catalyst (10 mg)<br>,1 mL anhydrous toluene, amine<br>(1.2 mmol) , ultrasound 15–60<br>min at room temperature                                                                                                                                                                                           | 78 | 21 |  |

## Spectroscopic Data for Products:

### N-methyl-2-phenylacetamide (3a):

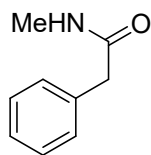

white solid, 133 mg, 89% yield, mp 60–61 °C; <sup>1</sup>H NMR (600 MHz, CDCl<sub>3</sub>) δ 7.35 (t, *J* = 7.4 Hz, 2H), 7.29 (t, *J* = 7.4 Hz, 1H), 7.25 (d, *J* = 7.1 Hz, 2H), 5.43 (s, 1H), 3.57 (s, 2H), 2.75 (d, *J* = 4.9 Hz, 3H); <sup>13</sup>C NMR (150 MHz, CDCl<sub>3</sub>) δ 171.6, 134.9, 129.5, 129.0, 127.3, 43.7, 26.5; HRMS (ESI-TOF) *m/z* [M + H]<sup>+</sup> calcd for C<sub>9</sub>H<sub>12</sub>NO 150.0919, found 150.0925..

### 2-(benzo[d][1,3]dioxol-5-yl)-N-methylacetamide (3b):

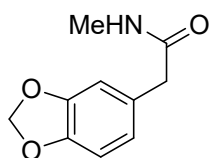

white solid, 170 mg, 88% yield, mp 131.4–132.3 °C; <sup>1</sup>H NMR (600 MHz, CDCl<sub>3</sub>) δ 6.78 (d, *J* = 7.8 Hz, 1H), 6.73 (d, *J* = 1.4 Hz, 1H), 6.69 (d, *J* = 7.9 Hz, 1H), 5.96 (s, 2H), 5.45 (s, 1H), 3.47 (s, 2H), 2.76 (d, *J* = 4.9 Hz, 3H); <sup>13</sup>C NMR (150 MHz, CDCl<sub>3</sub>) δ 171.7, 148.1, 146.9, 128.4, 122.7, 109.8, 108.7, 101.1, 43.3, 26.5; HRMS (ESI-TOF) *m/z* [M + H]<sup>+</sup> calcd for C<sub>10</sub>H<sub>12</sub>NO<sub>3</sub> 194.0817, found 194.0822.

### 2-(4-chlorophenyl)-N-methylacetamide (3c):

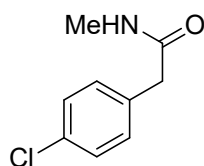

white solid, 137 mg, 84% yield, mp 113– 114 °C; <sup>1</sup>H NMR (600 MHz, CDCl<sub>3</sub>) δ 7.33 – 7.30 (m, 2H), 7.20 – 7.18 (m, 2H), 5.45 (s, 1H), 3.52 (s, 2H), 2.76 (d, *J* = 4.9 Hz, 3H); <sup>13</sup>C NMR (150 MHz, CDCl<sub>3</sub>) δ 171.0, 133.4, 133.3, 130.8, 129.1, 43.0, 26.6; HRMS (ESI-TOF) *m/z* [M + H]<sup>+</sup> calcd for C<sub>9</sub>H<sub>11</sub>ClNO 184.0529, found 184.0534.

**2-(3-bromophenyl)-N-methylacetamide (3d):**

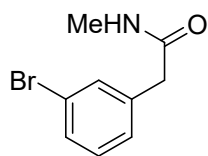

white solid, 181.6 mg, 80% yield, mp 102–104 °C; <sup>1</sup>H NMR (600 MHz, CDCl<sub>3</sub>) δ 7.42 (dd, *J* = 6.6, 1.5 Hz, 2H), 7.21 (qd, *J* = 7.7, 1.5 Hz, 2H), 5.46 (s, 1H), 3.52 (s, 2H), 2.78 (d, *J* = 4.9 Hz, 3H); <sup>13</sup>C NMR (150 MHz, CDCl<sub>3</sub>) δ 170.7, 137.1, 132.4, 130.5, 128.1, 122.9, 43.2, 26.6; HRMS (ESI-TOF) *m/z* [M + H]<sup>+</sup> calcd for C<sub>9</sub>H<sub>11</sub>BrNO 228.0024, found 228.0030.

**2-(3-methoxyphenyl)-N-methylacetamide (3e):**

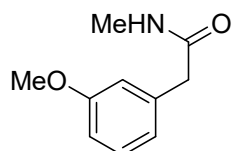

white solid, 161 mg, 90% yield, mp 120–121 °C; <sup>1</sup>H NMR (600 MHz, CDCl<sub>3</sub>) δ 7.27 (t, *J* = 7.9 Hz, 1H), 6.84 (dd, *J* = 6.9, 4.2 Hz, 2H), 6.80 (d, *J* = 1.6 Hz, 1H), 5.46 (s, 1H), 3.81 (s, 3H), 3.55 (s, 2H), 2.76 (d, *J* = 4.9 Hz, 3H); <sup>13</sup>C NMR (150 MHz, CDCl<sub>3</sub>) δ 171.4, 160.0, 136.4, 130.1, 121.8, 115.1, 112.8, 55.2, 43.8, 26.5; HRMS (ESI-TOF) *m/z* [M + H]<sup>+</sup> calcd for C<sub>10</sub>H<sub>14</sub>NO<sub>2</sub> 180.1025, found 180.1028.

**2-(4-bromophenyl)-N-methylacetamide (3f):**

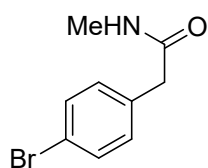

white solid, 182 mg, 80% yield, mp 118–120 °C; <sup>1</sup>H NMR (600 MHz, CDCl<sub>3</sub>) δ 7.47 (d, *J* = 8.3 Hz, 2H), 7.13 (d, *J* = 8.2 Hz, 2H), 5.44 (s, 1H), 3.50 (s, 2H), 2.76 (d, *J* = 4.9 Hz, 3H); <sup>13</sup>C NMR (150 MHz, CDCl<sub>3</sub>) δ 170.9, 133.9, 132.1, 131.1, 121.4, 42.9, 26.5; HRMS (ESI-TOF) *m/z* [M + H]<sup>+</sup> calcd for C<sub>9</sub>H<sub>11</sub>BrNO 228.0024, found 228.0035.

**2-(2,5-dimethylphenyl)-N-methylacetamide (3g):**

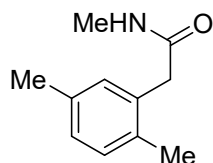

white solid, 171 mg, 96% yield, mp 86–88 °C; <sup>1</sup>H NMR (600 MHz, CDCl<sub>3</sub>) δ 7.09 (d, *J* = 7.7 Hz, 1H), 7.03 (d, *J* = 7.7 Hz, 1H), 6.98 (s, 1H), 5.31 (s, 1H), 3.55 (s, 2H), 2.74 (d, *J* = 4.9 Hz, 3H), 2.31 (s, 3H), 2.23 (s, 3H); <sup>13</sup>C NMR (150 MHz, CDCl<sub>3</sub>) δ 171.6, 136.2, 134.1, 133.2, 131.4, 130.7, 128.5, 41.7, 26.5, 20.9, 19.0; HRMS (ESI-TOF) *m/z* [M + H]<sup>+</sup> calcd for C<sub>11</sub>H<sub>16</sub>NO 178.1232, found 178.1239.

**2-(3,5-dimethoxyphenyl)-N-methylacetamide (3h):**

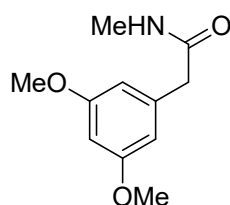

white solid, 184 mg, 88% yield, mp 85–87 °C; <sup>1</sup>H NMR (600 MHz, CDCl<sub>3</sub>) δ 6.83 (d, *J* = 7.9 Hz, 1H), 6.78 – 6.75 (m, 2H), 5.47 (s, 1H), 3.86 (s, 8H), 3.50 (s, 2H), 2.74 (d, *J* = 4.9 Hz, 3H); <sup>13</sup>C NMR (150 MHz, CDCl<sub>3</sub>) δ 172.0, 149.3, 148.4, 127.4, 121.7, 112.6, 111.6, 55.9, 55.9, 43.3, 26.5; HRMS (ESI-TOF) *m/z* [M + H]<sup>+</sup> calcd for C<sub>11</sub>H<sub>16</sub>NO<sub>3</sub> 210.1130, found 210.1138.

**2-(2-hydroxyphenyl)-N-methylacetamide(3i):**

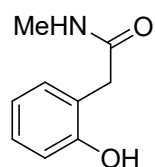

white solid, 117 mg, 71% yield, mp 104–105 °C; <sup>1</sup>H NMR (600 MHz, CDCl<sub>3</sub>) δ 9.88 (s, 1H), 7.18 – 7.14 (m, 1H), 7.02 (dd, *J* = 7.4, 1.1 Hz, 1H), 6.96 (d, *J* = 8.0 Hz, 1H), 6.84 – 6.80 (m, 1H), 6.57 (s, 1H), 3.57 (s, 2H), 2.78 (d, *J* = 4.9 Hz, 3H); <sup>13</sup>C NMR (150 MHz, CDCl<sub>3</sub>) δ 174.2, 155.9, 130.7, 129.2, 121.6, 120.4, 117.6, 40.5, 26.7; HRMS (ESI-TOF) *m/z* [M + H]<sup>+</sup> calcd for C<sub>9</sub>H<sub>12</sub>NO<sub>2</sub> 166.0868, found 166.0868.



**2-(3-hydroxy-4-methoxyphenyl)-N-methylacetamide(3j):**

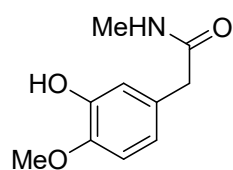

brown oil, 168 mg, 86% yield;  $^1\text{H}$  NMR (600 MHz,  $\text{CDCl}_3$ )  $\delta$  6.78 (t,  $J = 4.9$  Hz, 2H), 6.67 (dd,  $J = 8.2, 2.0$  Hz, 1H), 6.62 (s, 1H), 5.79 (s, 1H), 3.83 (s, 3H), 3.43 (s, 2H), 2.71 (d,  $J = 4.9$  Hz, 3H);  $^{13}\text{C}$  NMR (150 MHz,  $\text{CDCl}_3$ )  $\delta$  171.5, 145.3, 145.2, 126.7, 120.0, 115.0, 110.3, 54.9, 41.9, 25.5; HRMS (ESI-TOF)  $m/z$   $[\text{M} + \text{H}]^+$  calcd for  $\text{C}_{10}\text{H}_{14}\text{NO}_3$  196.0974, found 196.0976.

**N-methyl-2-(naphthalen-1-yl)acetamide (3k):**

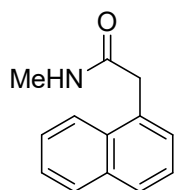

white solid, 159 mg, 80% yield, mp 123–124 °C;  $^1\text{H}$  NMR (600 MHz,  $\text{CDCl}_3$ )  $\delta$  7.95 (d,  $J = 8.2$  Hz, 1H), 7.92 – 7.86 (m, 1H), 7.83 (d,  $J = 8.2$  Hz, 1H), 7.58 – 7.49 (m, 2H), 7.48 – 7.42 (m, 1H), 7.39 (d,  $J = 6.8$  Hz, 1H), 5.32 (s, 1H), 4.02 (s, 2H), 2.66 (d,  $J = 4.9$  Hz, 3H);  $^{13}\text{C}$  NMR (150 MHz,  $\text{CDCl}_3$ )  $\delta$  171.4, 133.9, 132.0, 131.1, 128.8, 128.5, 128.4, 126.8, 126.2, 125.6, 123.8, 41.6, 26.4; HRMS (ESI-TOF)  $m/z$   $[\text{M} + \text{H}]^+$  calcd for  $\text{C}_{13}\text{H}_{14}\text{NO}$  200.1075, found 200.1087.

**N-methyl-2-(naphthalen-2-yl)acetamide (3l):**

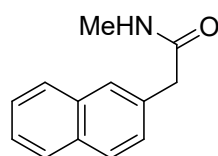

white solid, 163 mg, 82% yield, mp 117–120 °C;  $^1\text{H}$  NMR (600 MHz,  $\text{CDCl}_3$ )  $\delta$  7.88 – 7.78 (m, 3H), 7.70 (s, 1H), 7.53 – 7.45 (m, 2H), 7.36 (dd,  $J = 8.4, 1.7$  Hz, 1H), 5.48 (s, 1H), 3.73 (s, 2H), 2.74 (d,  $J = 4.9$  Hz, 3H);  $^{13}\text{C}$  NMR (150 MHz,  $\text{CDCl}_3$ )  $\delta$  171.6, 133.5, 132.5, 132.4, 128.8, 128.3, 127.7, 127.6, 127.4, 126.5, 126.1, 43.8, 26.5; HRMS (ESI-TOF)  $m/z$   $[\text{M} + \text{H}]^+$  calcd for  $\text{C}_{13}\text{H}_{14}\text{NO}$  200.1075, found 200.1084.

**N-methyl-3-phenylpropanamide (3m):**

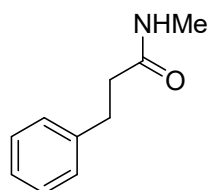

white solid, 156 mg, 96% yield, mp 55–57 °C; <sup>1</sup>H NMR (600 MHz, CDCl<sub>3</sub>) δ 7.30 – 7.25 (m, 2H), 7.20 (dd, *J* = 10.2, 4.5 Hz, 3H), 5.49 (s, 1H), 2.98 – 2.94 (m, 2H), 2.76 (d, *J* = 4.8 Hz, 3H), 2.49 – 2.43 (m, 2H); <sup>13</sup>C NMR (150 MHz, CDCl<sub>3</sub>) δ 172.7, 140.9, 128.5, 128.3, 126.2, 38.4, 31.7, 26.2; HRMS (ESI-TOF) *m/z* [M + H]<sup>+</sup> calcd for C<sub>10</sub>H<sub>14</sub>NO 164.1075, found 164.1087.

**(E)-N-methyl-3-(3,4,5-trimethoxyphenyl)acrylamide(3n):**

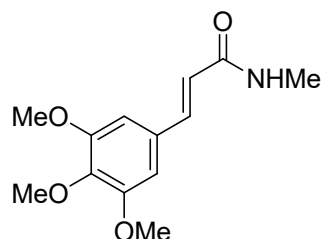

white solid, 191 mg, 76% yield, mp 136–138 °C; <sup>1</sup>H NMR (600 MHz, CDCl<sub>3</sub>) δ 7.52 (d, *J* = 15.5 Hz, 1H), 6.71 (s, 2H), 6.31 (d, *J* = 15.5 Hz, 1H), 5.78 (s, 1H), 3.86 (d, *J* = 1.2 Hz, 9H), 2.94 (d, *J* = 4.9 Hz, 3H); <sup>13</sup>C NMR (150 MHz, CDCl<sub>3</sub>) δ 166.5, 153.4, 140.7, 139.5, 130.4, 119.9, 104.9, 60.9, 56.1, 26.5; HRMS (ESI-TOF) *m/z* [M + H]<sup>+</sup> calcd for C<sub>13</sub>H<sub>18</sub>NO<sub>4</sub> 252.1236, found 252.1239.

**N-methylpent-4-enamide(3o):**

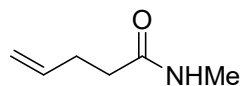

blandtaste, 79 mg, 70% yield; <sup>1</sup>H NMR (600 MHz, CDCl<sub>3</sub>) δ 6.58 (s, 1H), 5.73 (tdd, *J* = 16.8, 8.7, 4.0 Hz, 1H), 4.96 (d, *J* = 17.1 Hz, 1H), 4.90 (dd, *J* = 10.2, 0.7 Hz, 1H), 2.69 (d, *J* = 4.8 Hz, 3H), 2.29 (dd, *J* = 14.1, 6.7 Hz, 2H), 2.20 (t, *J* = 7.6 Hz, 2H); <sup>13</sup>C NMR (150 MHz, CDCl<sub>3</sub>) δ 172.5, 136.1, 114.4, 34.6, 28.7, 25.2; HRMS (ESI-TOF) *m/z* [M + H]<sup>+</sup> calcd for C<sub>10</sub>H<sub>12</sub>NO 114.0919, found 114.0932.

**N-methylpent-4-ynamide(3p):**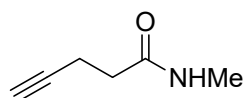

white solid, 97 mg, 87% yield, mp 56–57 °C; <sup>1</sup>H NMR (600 MHz, CDCl<sub>3</sub>) δ 6.14 (s, 1H), 2.78 (d, *J* = 4.8 Hz, 3H), 2.49 (td, *J* = 7.2, 2.6 Hz, 2H), 2.37 (t, *J* = 7.2 Hz, 2H), 1.97 (t, *J* = 2.5 Hz, 1H); <sup>13</sup>C NMR (150 MHz, CDCl<sub>3</sub>) δ 170.8, 82.02, 68.2, 34.2, 25.3, 13.9; HRMS (ESI-TOF) *m/z* [M + H]<sup>+</sup> calcd for C<sub>6</sub>H<sub>10</sub>NO 112.0762, found 112.0762.

**N-methyl-2-phenylpropanamide(3q):**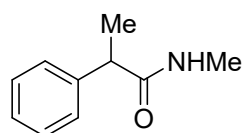

white solid, 155 mg 95% yield, White solid, mp:121-123 °C; <sup>1</sup>H NMR (600 MHz, CDCl<sub>3</sub>) δ 7.36 – 7.32 (m, 2H), 7.29 (dd, *J* = 5.7, 3.7 Hz, 2H), 7.26 (ddd, *J* = 5.4, 3.4, 1.6 Hz, 1H), 5.41 (s, 1H), 3.55 (q, *J* = 7.2 Hz, 1H), 2.73 (d, *J* = 4.9 Hz, 3H), 1.52 (d, *J* = 7.2 Hz, 3H); <sup>13</sup>C NMR (150 MHz, CDCl<sub>3</sub>) δ 174.8, 141.4, 128.9, 127.7, 127.2, 47.0, 26.5, 18.5; HRMS (ESI-TOF) *m/z* [M + H]<sup>+</sup> calcd for C<sub>10</sub>H<sub>13</sub>NO 164.1075, found 164.1077.

**2-(2,4-dichlorophenoxy)-N-methylpropanamide(3r):**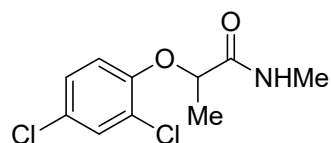

white solid, 217 mg, 88% yield, mp 121–124 °C; <sup>1</sup>H NMR (600 MHz, CDCl<sub>3</sub>) δ 7.40 (d, *J* = 2.5 Hz, 1H), 7.19 (dd, *J* = 8.8, 2.5 Hz, 1H), 6.83 (d, *J* = 8.8 Hz, 1H), 6.67 (s, 1H), 4.68 (q, *J* = 6.7 Hz, 1H), 2.87 (d, *J* = 5.0 Hz, 3H), 1.60 (d, *J* = 6.7 Hz, 3H); <sup>13</sup>C NMR (150 MHz, CDCl<sub>3</sub>) δ 171.6, 151.3, 130.3, 128.0, 127.3, 124.4, 115.9, 76.6, 25.9, 18.4; HRMS (ESI-TOF) *m/z* [M + H]<sup>+</sup> calcd for C<sub>10</sub>H<sub>12</sub>Cl<sub>2</sub>NO<sub>2</sub> 248.0245, found 248.0251.

**2-(1-(4-chlorobenzoyl)-5-methoxy-2-methyl-1H-indol-3-yl)-N-methylacetamide(3s):**

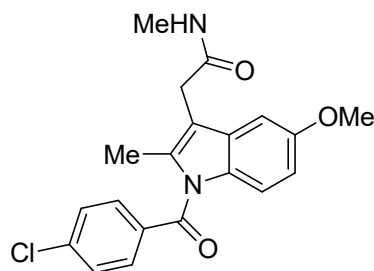

white solid, 333 mg, 90% yield, mp 168–170 °C; <sup>1</sup>H NMR (600 MHz, CDCl<sub>3</sub>) δ 7.66 (d, *J* = 8.6 Hz, 2H), 7.51 – 7.46 (m, 2H), 6.88 (d, *J* = 2.5 Hz, 1H), 6.85 (d, *J* = 9.0 Hz, 1H), 6.69 (dd, *J* = 9.0, 2.5 Hz, 1H), 5.60 (d, *J* = 3.7 Hz, 1H), 3.82 (s, 3H), 3.64 (s, 2H), 2.75 (d, *J* = 4.9 Hz, 3H), 2.38 (s, 3H); <sup>13</sup>C NMR (150 MHz, CDCl<sub>3</sub>) δ 170.5, 168.3, 156.3, 139.6, 136.4, 133.5, 131.2, 130.9, 130.3, 129.2, 115.1, 112.8, 112.3, 100.8, 55.7, 32.0, 26.5, 13.2; HRMS (ESI-TOF) *m/z* [M + H]<sup>+</sup> calcd for C<sub>20</sub>H<sub>20</sub>ClN<sub>2</sub>O<sub>3</sub> 371.1162, found 371.1163.

**2-(3-benzoylphenyl)-N-methylpropanamide(3t):**

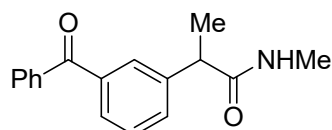

white solid, 254 mg, 95% yield, mp 94–96 °C; <sup>1</sup>H NMR (600 MHz, CDCl<sub>3</sub>) δ 7.82 – 7.76 (m, 2H), 7.74 (t, *J* = 1.6 Hz, 1H), 7.67 – 7.63 (m, 1H), 7.63 – 7.57 (m, 2H), 7.52 – 7.42 (m, 3H), 5.56 (s, 1H), 3.61 (q, *J* = 7.1 Hz, 1H), 2.75 (d, *J* = 4.8 Hz, 3H), 1.54 (d, *J* = 7.2 Hz, 3H); <sup>13</sup>C NMR (150 MHz, CDCl<sub>3</sub>) δ 196.5, 174.1, 141.9, 138.0, 137.4, 132.6, 131.6, 130.0, 129.1, 128.7, 128.3, 46.9, 26.5, 18.6; HRMS (ESI-TOF) *m/z* [M + H]<sup>+</sup> calcd for C<sub>17</sub>H<sub>18</sub>NO<sub>2</sub> 268.1338, found 268.1339.

**2-(6-methoxynaphthalen-2-yl)-N-methylpropanamide(3u):**

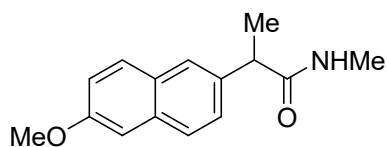

white solid, 214 mg, 88% yield, mp 133–135 °C; <sup>1</sup>H NMR (600 MHz, CDCl<sub>3</sub>) δ 7.71 (t, *J* = 8.9 Hz, 2H), 7.66 (s, 1H), 7.37 (dd, *J* = 8.4, 1.8 Hz, 1H), 7.18 – 7.07 (m, 2H), 5.40 (s, 1H), 3.92 (s, 3H), 3.69 (q, *J* = 7.2 Hz, 1H), 2.72 (d, *J* = 4.9 Hz, 3H), 1.60 (d, *J* = 7.2 Hz, 3H); <sup>13</sup>C NMR (150 MHz, CDCl<sub>3</sub>) δ 174.9, 157.7, 136.4, 133.7, 129.2, 128.9, 127.5, 126.4, 126.2, 119.2, 105.6, 55.3, 47.0, 26.5, 18.4; HRMS (ESI-TOF) *m/z* [M + H]<sup>+</sup> calcd for C<sub>15</sub>H<sub>18</sub>NO<sub>3</sub> 244.1338, found 244.1339.

**N-benzyl-2-phenylacetamide (3v):**

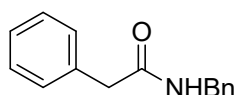

white solid, 185 mg, 82% yield, mp 118–119 °C; <sup>1</sup>H NMR (600 MHz, CDCl<sub>3</sub>) δ 7.36 (t, *J* = 7.1 Hz, 2H), 7.33 – 7.27 (m, 5H), 7.19 (d, *J* = 7.6 Hz, 2H), 5.75 (s, 1H), 4.42 (d, *J* = 5.7 Hz, 2H), 3.64 (s, 2H); <sup>13</sup>C NMR (150 MHz, CDCl<sub>3</sub>) δ 170.8, 138.1, 134.8, 129.4, 129.0, 128.6, 127.5, 127.4, 127.4, 43.8, 43.6. HRMS (ESI-TOF) *m/z* [M + H]<sup>+</sup> calcd for C<sub>15</sub>H<sub>16</sub>NO 226.1232, found 226.1241.

**2-(benzo[d][1,3]dioxol-5-yl)-N-(1-phenylethyl)acetamide (3w):**

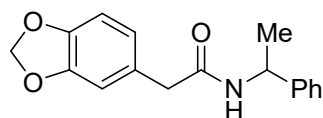

white solid, 226 mg 80% yield, mp: 95-96 °C; <sup>1</sup>H NMR (600 MHz, CDCl<sub>3</sub>) δ 7.31 (t, *J* = 7.5 Hz, 2H), 7.26 – 7.22 (m, 1H), 7.22 – 7.18 (m, 2H), 6.78 (d, *J* = 7.9 Hz, 1H), 6.74 (d, *J* = 1.6 Hz, 1H), 6.69 (dd, *J* = 7.9, 1.7 Hz, 1H), 5.96 (s, 2H), 5.69 (d, *J* = 6.7 Hz, 1H), 5.12 (p, *J* = 7.0 Hz, 1H), 3.53 – 3.43 (m, 2H), 1.41 (d, *J* = 6.9 Hz, 3H); <sup>13</sup>C NMR (150 MHz, CDCl<sub>3</sub>) δ 170.1, 148.1, 146.9, 143.0, 128.6, 128.4, 127.3, 126.0, 122.5, 109.7, 108.6, 101.1, 48.7, 43.4, 21.7; HRMS (ESI-TOF) *m/z* [M + H]<sup>+</sup> calcd for C<sub>17</sub>H<sub>17</sub>NO<sub>3</sub> 284.1287, found 284.1285.

**N-(4-chlorophenyl)-2-phenylacetamide (3x):**

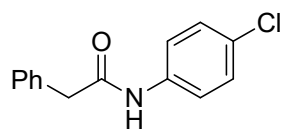

white solid, 198 mg, 81% yield, mp 158–160 °C; <sup>1</sup>H NMR (600 MHz, CDCl<sub>3</sub>) δ 7.31 (ddd, *J* = 20.6, 16.2, 7.5 Hz, 6H), 7.18 (dd, *J* = 8.3, 7.4 Hz, 3H), 3.86 – 3.53 (m, 2H); <sup>13</sup>C NMR (150 MHz, CDCl<sub>3</sub>) δ 169.1, 136.2, 134.2, 129.5, 129.4, 129.3, 128.9, 127.8, 121.1, 44.7; HRMS (ESI-TOF) *m/z* [M + H]<sup>+</sup> calcd for C<sub>14</sub>H<sub>13</sub>ClNO 246.0686, found 246.0695.

**2-phenyl-N-(p-tolyl)acetamide (3y):**

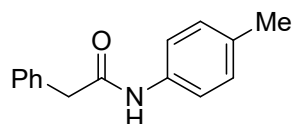

white solid, 187 mg, 83% yield, mp 122–123 °C; <sup>1</sup>H NMR (600 MHz, CDCl<sub>3</sub>) δ 7.42 – 7.37 (m, 2H), 7.33 (dd, *J* = 7.1, 3.6 Hz, 3H), 7.29 (d, *J* = 8.4 Hz, 2H), 7.11 (s, 1H), 7.08 (d, *J* = 8.3 Hz, 2H), 3.72 (s, 2H), 2.29 (s, 3H); <sup>13</sup>C NMR (150 MHz, CDCl<sub>3</sub>) δ 169.0, 135.0, 134.5, 134.1, 129.5, 129.4, 129.2, 127.6, 119.9, 44.8, 20.8; HRMS (ESI-TOF) *m/z* [M + H]<sup>+</sup> calcd for C<sub>15</sub>H<sub>16</sub>NO 226.1232, found 226.1241.

**N-methylbenzamide (3aa):**

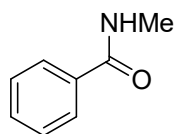

white solid, 115 mg, 85% yield, mp 73–74 °C; <sup>1</sup>H NMR (600 MHz, CDCl<sub>3</sub>) δ 7.79 – 7.74 (m, 2H), 7.49 (t, *J* = 7.4 Hz, 1H), 7.42 (dd, *J* = 10.4, 4.7 Hz, 2H), 6.16 (s, 1H), 3.02 (d, *J* = 4.9 Hz, 3H); <sup>13</sup>C NMR (150 MHz, CDCl<sub>3</sub>) δ 168.2, 134.7, 131.4, 128.6, 126.8, 26.9; HRMS (ESI-TOF) *m/z* [M + H]<sup>+</sup> calcd for C<sub>8</sub>H<sub>10</sub>NO 136.0762, found 136.0761.

**4-bromo-N-methylbenzamide (3ab):**

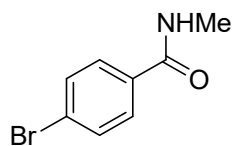

white solid, 170 mg, 80% yield, mp 157–159 °C; <sup>1</sup>H NMR (600 MHz, CDCl<sub>3</sub>) δ 7.62 (d, *J* = 8.6 Hz, 2H), 7.55 (d, *J* = 8.6 Hz, 2H), 6.25 (s, 1H), 2.99 (d, *J* = 4.9 Hz, 3H); <sup>13</sup>C NMR (150 MHz, CDCl<sub>3</sub>) δ 167.3, 133.4, 131.8, 128.5, 126.0, 26.9; HRMS (ESI-TOF) *m/z* [M + H]<sup>+</sup> calcd for C<sub>8</sub>H<sub>9</sub>BrNO 213.9868, found 213.9879.

**4-fluoro-N-methylbenzamide (3ac):**

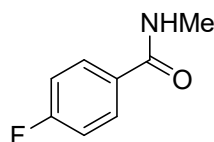

white solid, 122 mg, 80% yield, mp 111–113 °C; <sup>1</sup>H NMR (600 MHz, CDCl<sub>3</sub>) δ 7.87 – 7.71 (m, 2H), 7.13 – 7.04 (m, 2H), 6.33 (s, 1H), 2.99 (d, *J* = 4.8 Hz, 3H); <sup>13</sup>C NMR (150 MHz, CDCl<sub>3</sub>) δ 167.3, 165.4, 130.7(d, *J* = 3.1 Hz), 129. (d, *J* = 8.8 Hz), 115.5 (d, *J* = 21.8 Hz), 26.9; HRMS (ESI-TOF) *m/z* [M + H]<sup>+</sup> calcd for C<sub>8</sub>H<sub>9</sub>FNO 154.0668, found 154.0678.

**N,4-dimethylbenzamide (3ad):**

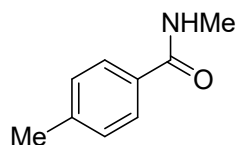

white solid, 127 mg, 85% yield, mp 136–138 °C; <sup>1</sup>H NMR (600 MHz, CDCl<sub>3</sub>) δ 7.66 (d, *J* = 8.1 Hz, 2H), 7.20 (d, *J* = 8.3 Hz, 2H), 6.31 (s, 1H), 2.98 (d, *J* = 4.8 Hz, 3H), 2.37 (s, 3H); <sup>13</sup>C NMR (150 MHz, CDCl<sub>3</sub>) δ 168.2, 141.6, 131.7, 129.1, 126.8, 26.7, 21.4; HRMS (ESI-TOF) *m/z* [M + H]<sup>+</sup> calcd for C<sub>9</sub>H<sub>12</sub>NO 150.0919, found 150.0930.

**4-methoxy-N-methylbenzamide (3ae):**

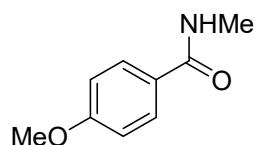

white solid, 142 mg, 86% yield, mp 114–116 °C; <sup>1</sup>H NMR (600 MHz, CDCl<sub>3</sub>) δ 7.73 (d, *J* = 8.9 Hz, 2H), 6.90 (d, *J* = 8.9 Hz, 2H), 6.24 (s, 1H), 3.84 (s, 3H), 2.99 (d, *J* = 4.8 Hz, 3H); <sup>13</sup>C NMR (150 MHz, CDCl<sub>3</sub>) δ 167.8, 162.0, 128.6, 126.9, 113.7, 55.3, 26.7; HRMS (ESI-TOF) *m/z* [M + H]<sup>+</sup> calcd for C<sub>9</sub>H<sub>12</sub>NO<sub>2</sub> 166.0868, found 166.0882.

**N-methyl-4-nitrobenzamide (3af):**

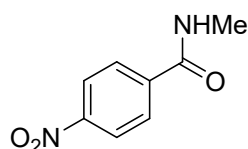

white solid, 144 mg, 80% yield, mp 225–227 °C; <sup>1</sup>H NMR (600 MHz, DMSO) δ 8.76 (d, *J* = 3.6 Hz, 1H), 8.34 – 8.25 (m, 2H), 8.11 – 7.99 (m, 2H), 2.81 (d, *J* = 4.6 Hz, 3H); <sup>13</sup>C NMR (150 MHz, DMSO) δ 165.0, 148.9, 140.1, 128.6, 123.5, 26.4; HRMS (ESI-TOF) *m/z* [M + H]<sup>+</sup> calcd for C<sub>8</sub>H<sub>9</sub>N<sub>2</sub>O<sub>3</sub> 181.0613, found 181.0624.

**N-methyl-4-(methylsulfonyl)benzamide (3ag):**

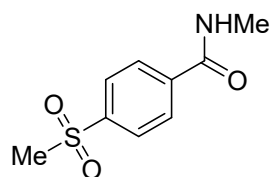

white solid, 160 mg, 75% yield, mp 196–198 °C; <sup>1</sup>H NMR (600 MHz, DMSO) δ 8.70 (d, *J* = 4.3 Hz, 1H), 8.07 – 7.98 (m, 4H), 3.26 (s, 3H), 2.81 (d, *J* = 4.6 Hz, 3H); <sup>13</sup>C NMR (150 MHz, DMSO) δ 165.4, 142.8, 139.0, 128.1, 127.1, 43.3, 26.4; HRMS (ESI-TOF) *m/z* [M + H]<sup>+</sup> calcd for C<sub>9</sub>H<sub>12</sub>NO<sub>3</sub>S 214.0538, found 214.0545.



**N-methyl-3,5-dinitrobenzamide (3ah):**

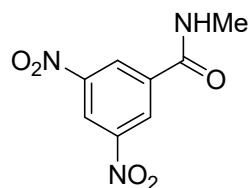

white solid, 135 mg, 60% yield, mp 147–150 °C; <sup>1</sup>H NMR (600 MHz, CDCl<sub>3</sub>) δ 9.15 (t, *J* = 2.1 Hz, 1H), 8.97 (d, *J* = 2.0 Hz, 2H), 6.72 (s, 1H), 3.11 (d, *J* = 4.8 Hz, 3H); <sup>13</sup>C NMR (150 MHz, CDCl<sub>3</sub>) δ 163.4, 148.6, 137.9, 127.1, 121.0, 27.3; HRMS (ESI-TOF) *m/z* [M + H]<sup>+</sup> calcd for C<sub>8</sub>H<sub>8</sub>N<sub>3</sub>O<sub>5</sub> 226.0464, found 226.0472.

**4-cyano-N-methylbenzamide (3ai):**

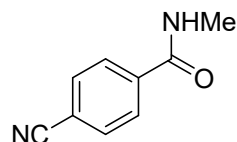

white solid, 112 mg, 70% yield, mp 205–206 °C; <sup>1</sup>H NMR (600 MHz, DMSO) δ 8.70 (s, 1H), 8.03 – 7.88 (m, 4H), 2.80 (d, *J* = 4.6 Hz, 3H); <sup>13</sup>C NMR (150 MHz, DMSO) δ 165.6, 138.9, 132.9, 128.4, 118.8, 113.9, 26.8; HRMS (ESI-TOF) *m/z* [M + H]<sup>+</sup> calcd for C<sub>9</sub>H<sub>9</sub>N<sub>2</sub>O 161.0715, found 161.0717.

**4-bromo-2-fluoro-N-methylbenzamide (3aj):**

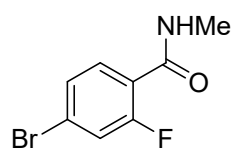

white solid, 207 mg, 95% yield, mp 112–113 °C; <sup>1</sup>H NMR (600 MHz, CDCl<sub>3</sub>) δ 7.99 (t, *J* = 8.5 Hz, 1H), 7.41 (dd, *J* = 8.4, 1.7 Hz, 1H), 7.31 (dd, *J* = 11.3, 1.8 Hz, 1H), 6.67 (s, 1H), 3.02 (d, *J* = 4.8 Hz, 3H); <sup>13</sup>C NMR (150 MHz, CDCl<sub>3</sub>) δ 163.0 (d, *J* = 3.2 Hz), 160.1 (d, *J* = 250.9 Hz), 133.21 (d, *J* = 2.6 Hz), 128.3 (d, *J* = 3.2 Hz), 126.2 (d, *J* = 10.5 Hz), 120.0 (d, *J* = 11.9 Hz), 119.5 (d, *J* = 28.3 Hz).26.9; HRMS (ESI-TOF) *m/z* [M + H]<sup>+</sup> calcd for C<sub>8</sub>H<sub>8</sub>BrFNO 231.9773, found 231.9773.

**3-methyl-2-thioxo-2H-benzo[e][1,3]thiazin-4(3H)-one (3ak):**

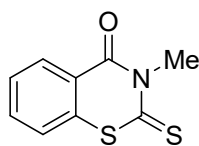

white solid, 207 mg, 99% yield, mp 142–143 °C; <sup>1</sup>H NMR (600 MHz, CDCl<sub>3</sub>) δ 8.33 (dd, *J* = 8.1, 0.9 Hz, 1H), 7.63 – 7.59 (m, 1H), 7.44 (t, *J* = 7.7 Hz, 1H), 7.18 (d, *J* = 8.0 Hz, 1H), 3.92 (s, 3H); <sup>13</sup>C NMR (150 MHz, CDCl<sub>3</sub>) δ 192.4, 160.5, 136.3, 134.0, 131.8, 127.9, 122.9, 121.8, 35.0; HRMS (ESI-TOF) *m/z* [M + H]<sup>+</sup> calcd for C<sub>9</sub>H<sub>8</sub>NOS<sub>2</sub> 210.0047, found 210.0038.

**2-bromo-N,4-dimethylbenzamide (3al):**

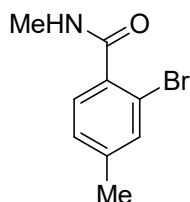

white solid, 175 mg, 77% yield, mp 95.6–98 °C; <sup>1</sup>H NMR (600 MHz, CDCl<sub>3</sub>) δ 7.44 (d, *J* = 7.8 Hz, 1H), 7.42 – 7.38 (m, 1H), 7.13 (dd, *J* = 7.8, 0.7 Hz, 1H), 6.07 (s, 1H), 3.00 (d, *J* = 4.9 Hz, 3H), 2.33 (s, 3H); <sup>13</sup>C NMR (150 MHz, CDCl<sub>3</sub>) δ 168.2, 141.9, 134.7, 133.8, 129.7, 128.3, 119.0, 26.7, 20.9. HRMS (ESI-TOF) *m/z* [M + H]<sup>+</sup> calcd for C<sub>9</sub>H<sub>11</sub>BrNO 228.0024, found 228.0035.

**2-bromo-5-fluoro-N-methylbenzamide (3am):**

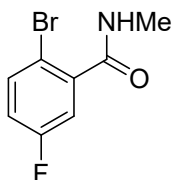

white solid, 193 mg, 84% yield, mp 132–134 °C; <sup>1</sup>H NMR (600 MHz, CDCl<sub>3</sub>) δ 7.49 (dt, *J* = 16.4, 5.2 Hz, 2H), 7.30 – 7.18 (m, 1H), 6.05 (s, 1H), 3.00 (dt, *J* = 7.9, 4.9 Hz, 3H); <sup>13</sup>C NMR (150 MHz, CDCl<sub>3</sub>) δ 166.9, 139.1, 134.5, 133.9, 131.3, 129.7, 117.2, 26.8; HRMS (ESI-TOF) *m/z* [M + H]<sup>+</sup> calcd for C<sub>8</sub>H<sub>8</sub>BrFNO 231.9773, found 231.9769.

**2-bromo-N,3-dimethylbenzamide (3an):**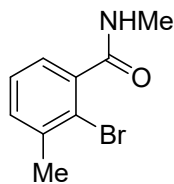

white solid, 193 mg, 85% yield, mp 115–117 °C; <sup>1</sup>H NMR (600 MHz, CDCl<sub>3</sub>) δ 7.33 – 7.31 (m, 1H), 7.29 (dt, *J* = 9.1, 4.7 Hz, 2H), 5.93 (s, 1H), 3.06 (d, *J* = 4.9 Hz, 3H), 2.49 (s, 3H); <sup>13</sup>C NMR (150 MHz, CDCl<sub>3</sub>) δ 169.3, 139.2, 139.2, 131.8, 127.2, 126.3, 121.6, 26.7, 23.6; HRMS (ESI-TOF) *m/z* [M + H]<sup>+</sup> calcd for C<sub>9</sub>H<sub>11</sub>BrNO 228.0024, found 228.0033.

**N-methylthiophene-2-carboxamide (3ao):**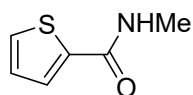

white solid, 120 mg, 85% yield, mp 98–100 °C; <sup>1</sup>H NMR (600 MHz, CDCl<sub>3</sub>) δ 7.50 (dd, *J* = 3.7, 0.9 Hz, 1H), 7.44 (dd, *J* = 5.0, 1.0 Hz, 1H), 7.06 (dd, *J* = 4.9, 3.7 Hz, 1H), 6.16 (s, 1H), 2.99 (d, *J* = 4.9 Hz, 3H); <sup>13</sup>C NMR (150 MHz, CDCl<sub>3</sub>) δ 162.6, 138.9, 129.7, 127.9, 127.6, 26.7; HRMS (ESI-TOF) *m/z* [M + H]<sup>+</sup> calcd for C<sub>6</sub>H<sub>8</sub>NOS 142.0327, found 142.0339.

**N,5-dimethyloxazole-4-carboxamide (3ap):**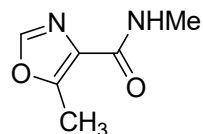

white solid, 127 mg, 91% yield, mp 104–105 °C; <sup>1</sup>H NMR (600 MHz, CDCl<sub>3</sub>) δ 7.64 (s, 1H), 6.94 (s, 1H), 2.92 (d, *J* = 5.1 Hz, 3H), 2.63 (s, 3H); <sup>13</sup>C NMR (150 MHz, CDCl<sub>3</sub>) δ 162.3, 152.9, 147.8, 128.8, 25.5, 11.4; HRMS (ESI-TOF) *m/z* [M + H]<sup>+</sup> calcd for C<sub>6</sub>H<sub>9</sub>N<sub>2</sub>O<sub>2</sub> 141.0664, found 141.0664.

**N-methylisonicotinamide (3aq):**

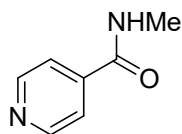

white solid, 123 mg, 90% yield, mp 107–108 °C; <sup>1</sup>H NMR (600 MHz, CDCl<sub>3</sub>) δ 8.69 (d, *J* = 5.4 Hz, 2H), 7.60 (d, *J* = 5.7 Hz, 2H), 6.77 (s, 1H), 3.00 (d, *J* = 4.8 Hz, 3H); <sup>13</sup>C NMR (150 MHz, CDCl<sub>3</sub>) δ 166.3, 150.4, 141.7, 120.9, 26.9; HRMS (ESI-TOF) *m/z* [M + H]<sup>+</sup> calcd for C<sub>7</sub>H<sub>9</sub>N<sub>2</sub>O 137.0715, found 137.0733.

**5-bromo-N-methylnicotinamide (3ar):**

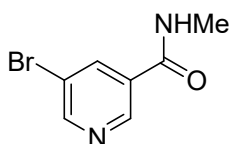

white solid, 143 mg, 67% yield, mp 145–146 °C; <sup>1</sup>H NMR (600 MHz, CDCl<sub>3</sub>) δ 8.86 (d, *J* = 1.5 Hz, 1H), 8.76 (d, *J* = 2.0 Hz, 1H), 8.25 (t, *J* = 2.0 Hz, 1H), 6.59 (s, 1H), 3.02 (d, *J* = 4.8 Hz, 3H); <sup>13</sup>C NMR (150 MHz, CDCl<sub>3</sub>) δ 165.0, 153.2, 145.8, 137.8, 131.6, 121.0, 27.0; HRMS (ESI-TOF) *m/z* [M + H]<sup>+</sup> calcd for C<sub>7</sub>H<sub>8</sub>BrN<sub>2</sub>O 214.9841, found 214.9841.

**N-methyl-4-(5-(trifluoromethyl)-1,2,4-oxadiazol-3-yl)benzamide (3as):**

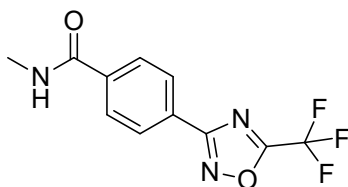

white solid, 249 mg, 92% yield, mp 160–161 °C; <sup>1</sup>H NMR (600 MHz, CDCl<sub>3</sub>) δ 8.17 (d, *J* = 8.4 Hz, 2H), 7.90 (d, *J* = 8.4 Hz, 2H), 6.36 (s, 1H), 3.05 (d, *J* = 4.8 Hz, 3H); <sup>13</sup>C NMR (150 MHz, CDCl<sub>3</sub>) δ 168.5, 167.1, 166.1 (q, *J* = 44.7 Hz), 138.0, 128.0, 127.7, 127.5, 115.9 (q, *J* = 273.7 Hz), 27.0; HRMS (ESI-TOF) *m/z* [M + H]<sup>+</sup> calcd for C<sub>11</sub>H<sub>9</sub>F<sub>3</sub>N<sub>3</sub>O<sub>2</sub> 272.0647, found 272.0646.

**2-methyl-1,2-dihydroisoquinolin-3(4H)-one (4a):**

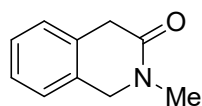

white solid, 132.0 mg, 82% yield, mp 107–108 °C; <sup>1</sup>H NMR (600 MHz, CDCl<sub>3</sub>) δ 7.24 (dd, *J* = 13.8, 7.1 Hz, 2H), 7.15 (t, *J* = 8.2 Hz, 2H), 4.50 (s, 2H), 3.62 (s, 2H), 3.11 (s, 3H); <sup>13</sup>C NMR (150 MHz, CDCl<sub>3</sub>) δ 168.9, 132.0, 130.7, 127.4, 127.2, 126.5, 125.0, 52.8, 36.7, 34.3; HRMS (ESI-TOF) *m/z* [M + H]<sup>+</sup> calcd for C<sub>10</sub>H<sub>12</sub>NO 162.0919, found 162.0921.

## $^1\text{H}$ and $^{13}\text{C}$ NMR Spectra:

### $^1\text{H}$ NMR of N-methyl-2-phenylacetamide (3a)

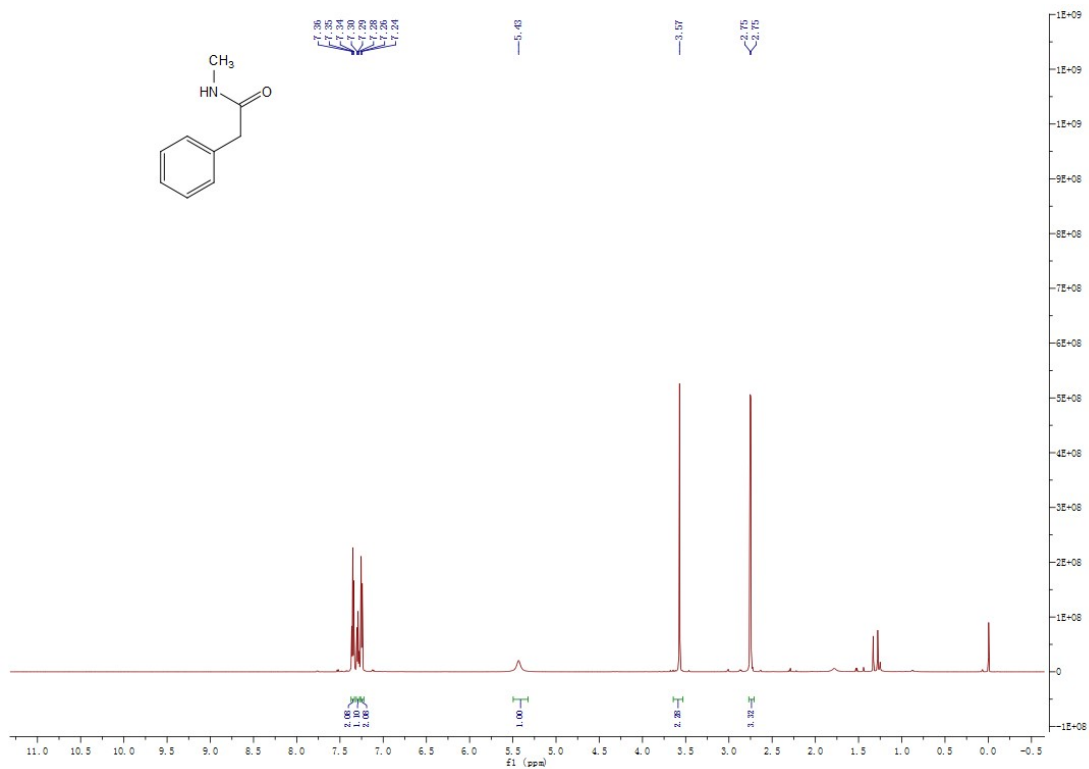

### $^{13}\text{C}$ NMR of N-methyl-2-phenylacetamide (3a)

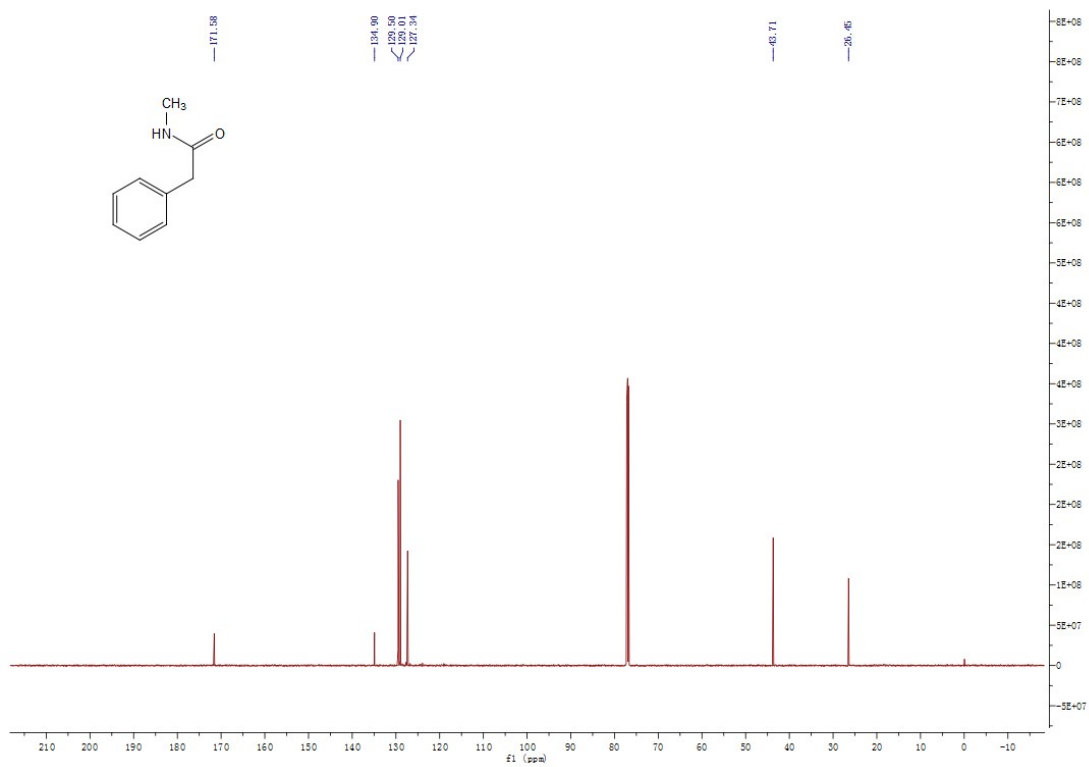

### $^1\text{H}$ NMR of 2-(benzo[d][1,3]dioxol-5-yl)-N-methylacetamide (3b)

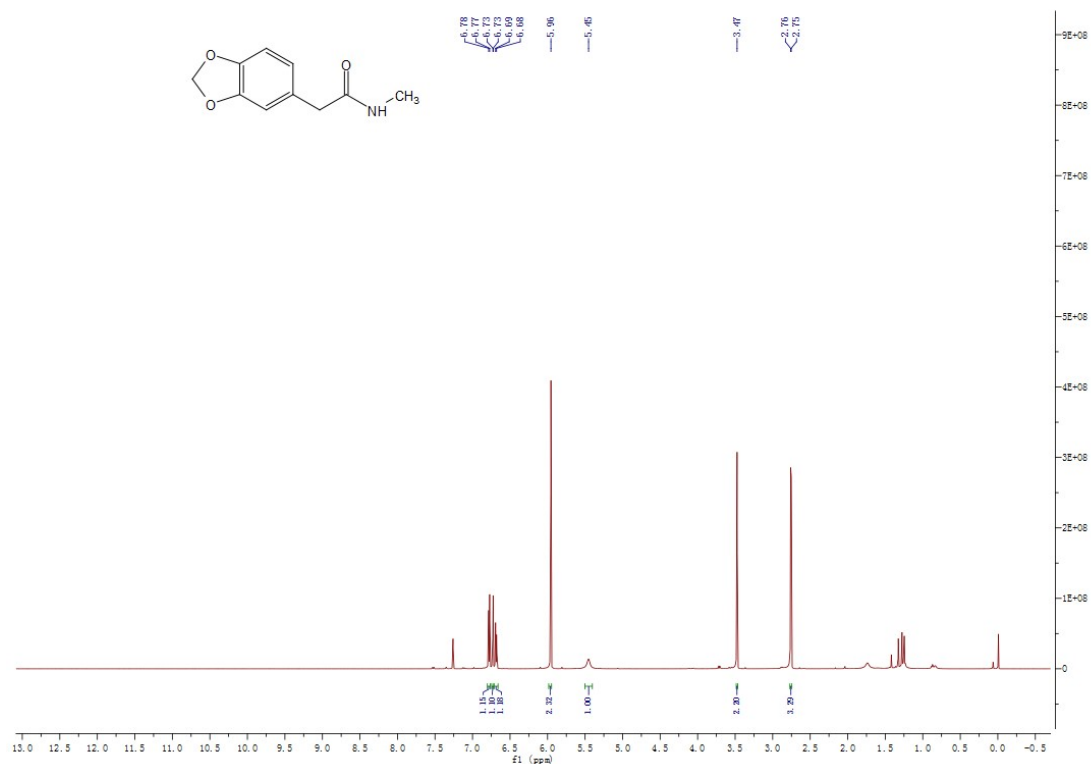

**<sup>13</sup>C NMR of 2-(benzo[d][1,3]dioxol-5-yl)-N-methylacetamide (3b)**

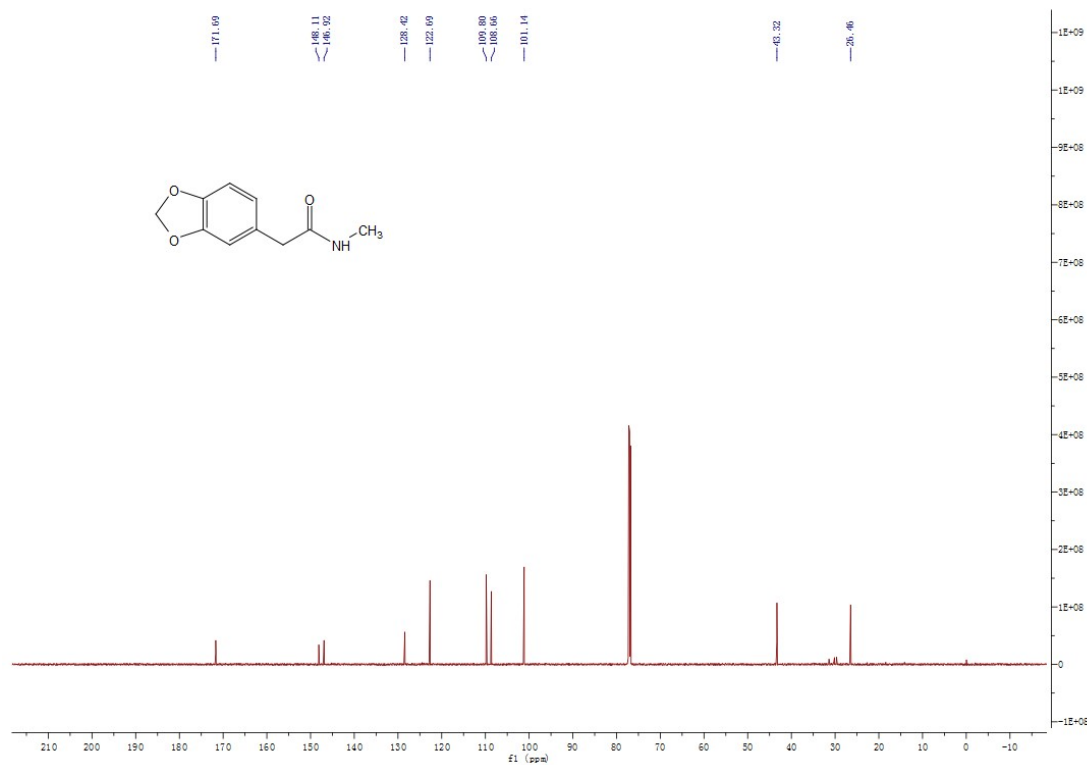

**<sup>1</sup>H NMR of 2-(4-chlorophenyl)-N-methylacetamide (3c)**

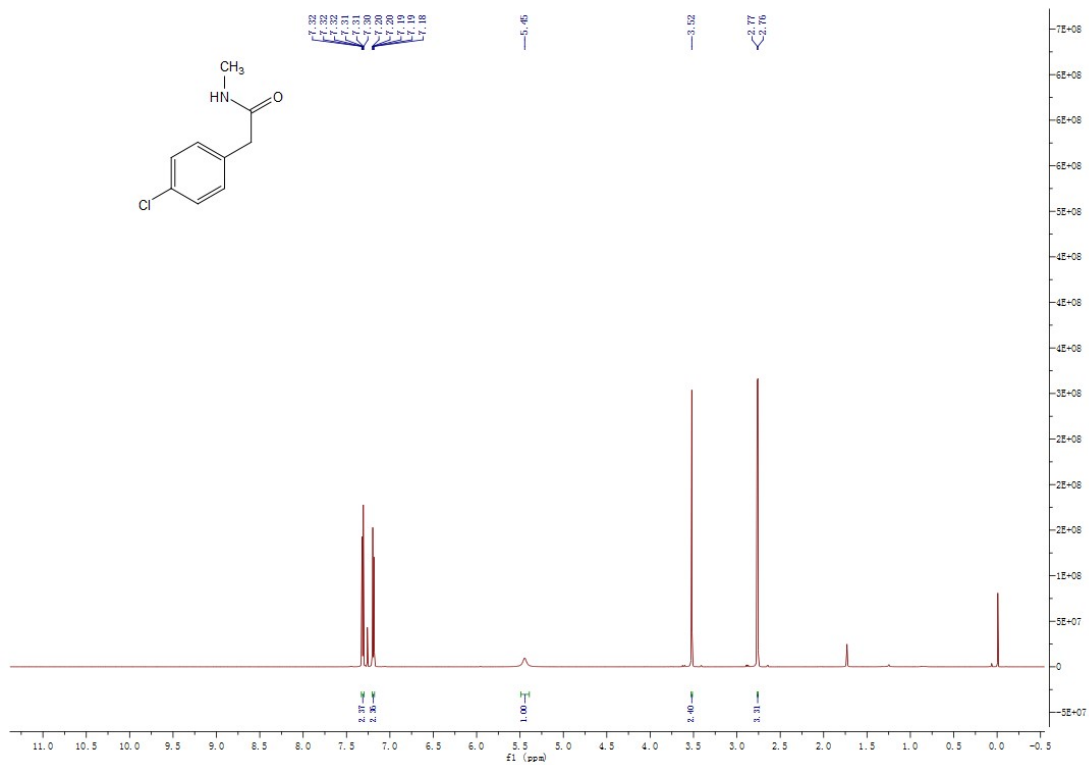

**<sup>13</sup>C NMR of 2-(4-chlorophenyl)-N-methylacetamide (3c)**

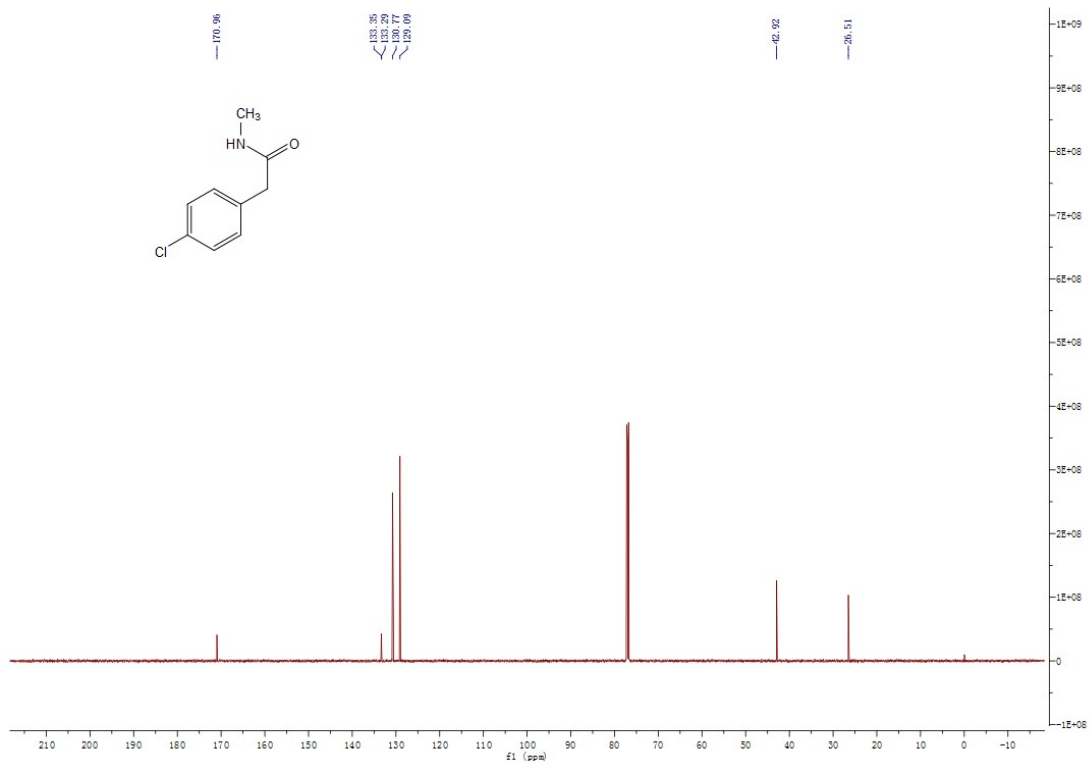

**<sup>1</sup>H NMR of 2-(3-bromophenyl)-N-methylacetamide (3d)**



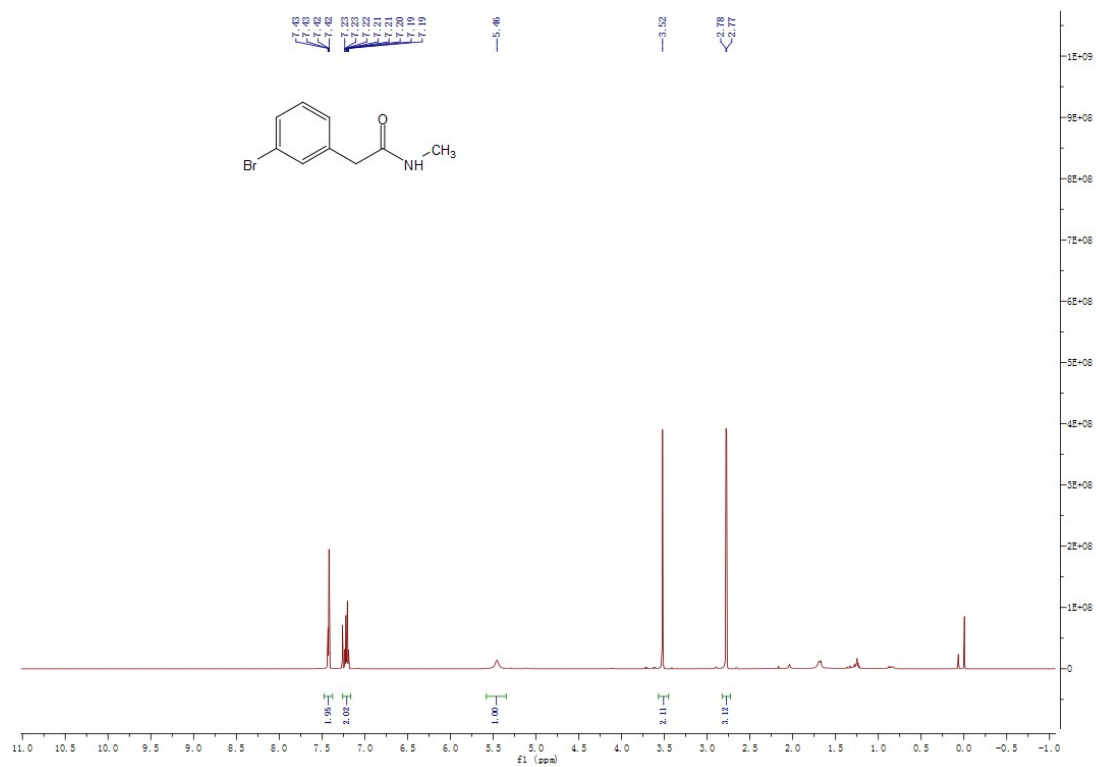

**<sup>13</sup>C NMR of 2-(3-bromophenyl)-N-methylacetamide (3d)**

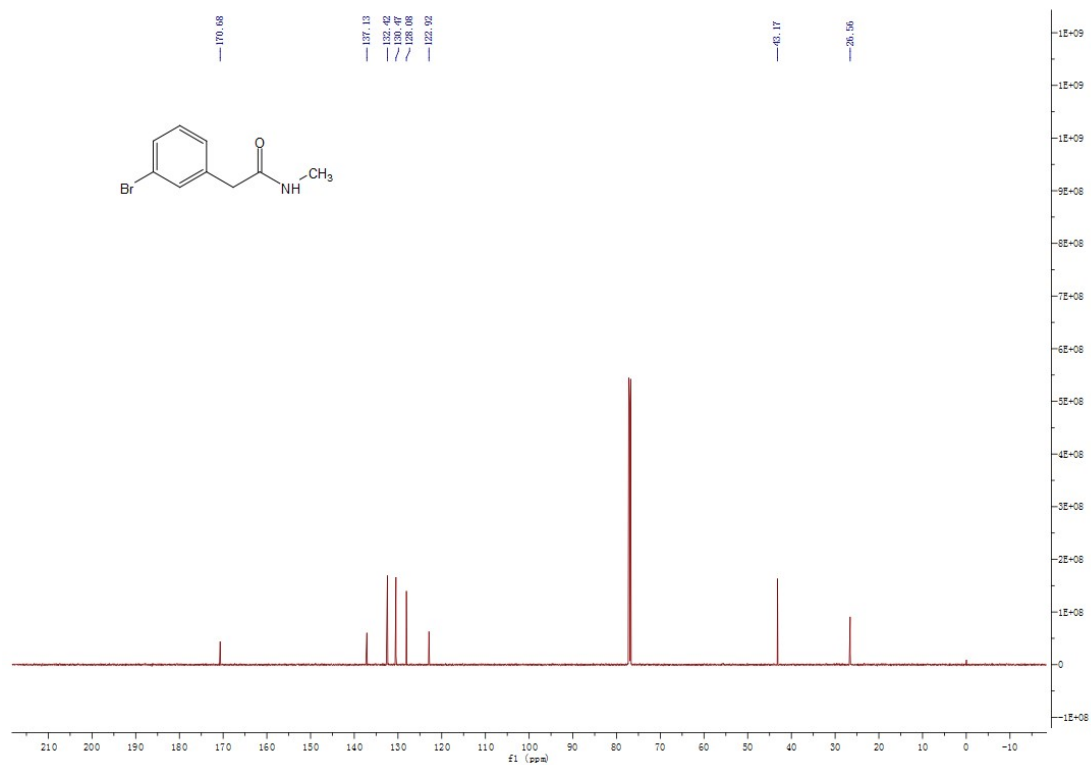

**<sup>1</sup>H NMR of 2-(3-methoxyphenyl)-N-methylacetamide (3e)**

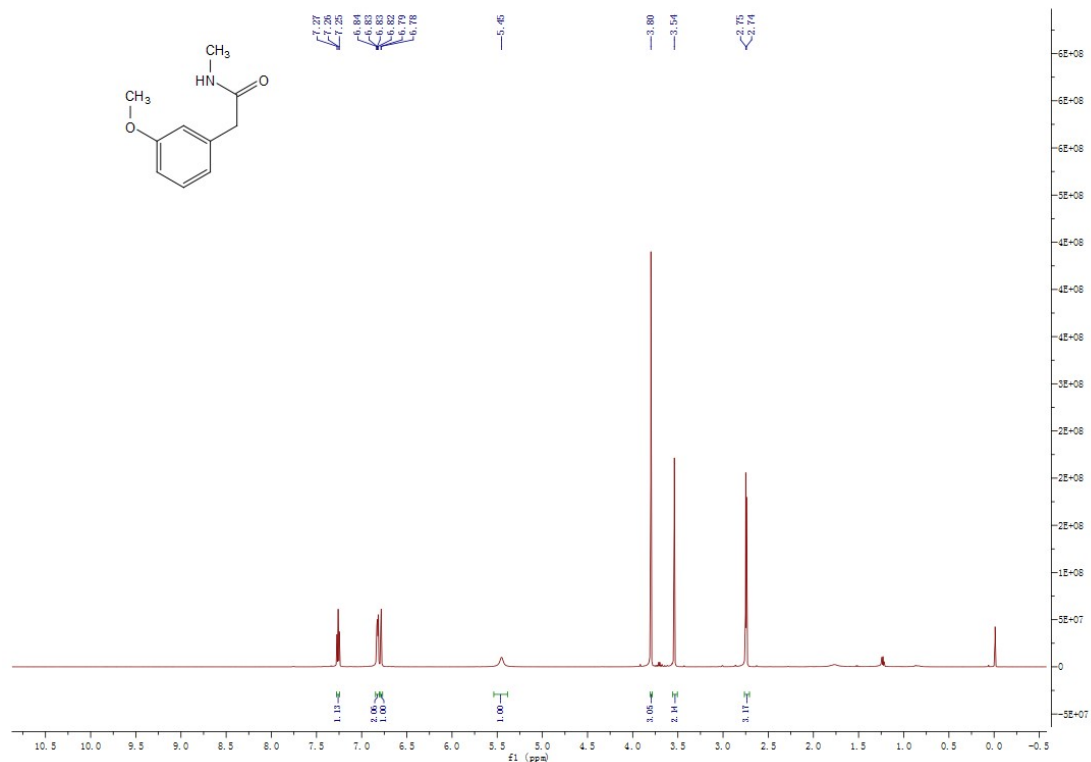

**<sup>13</sup>C NMR of 2-(3-methoxyphenyl)-N-methylacetamide (3e)**

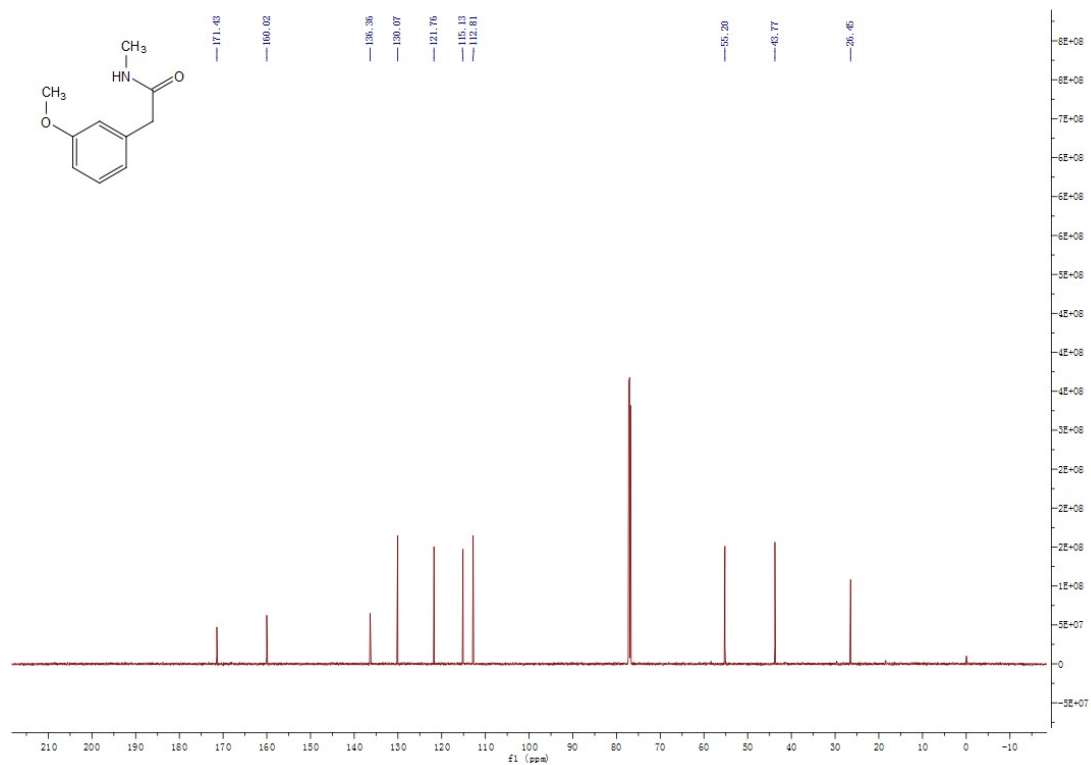

**<sup>1</sup>H NMR of 2-(4-bromophenyl)-N-methylacetamide (3f)**

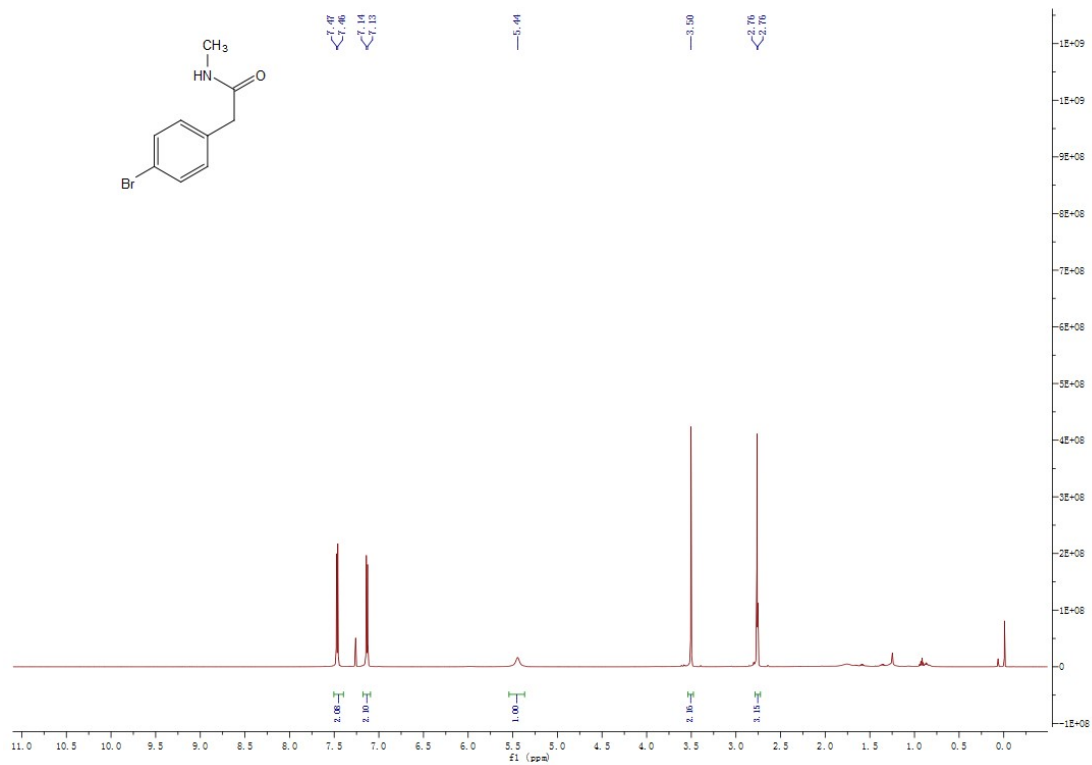

**<sup>13</sup>C NMR of 2-(4-bromophenyl)-N-methylacetamide (3f)**

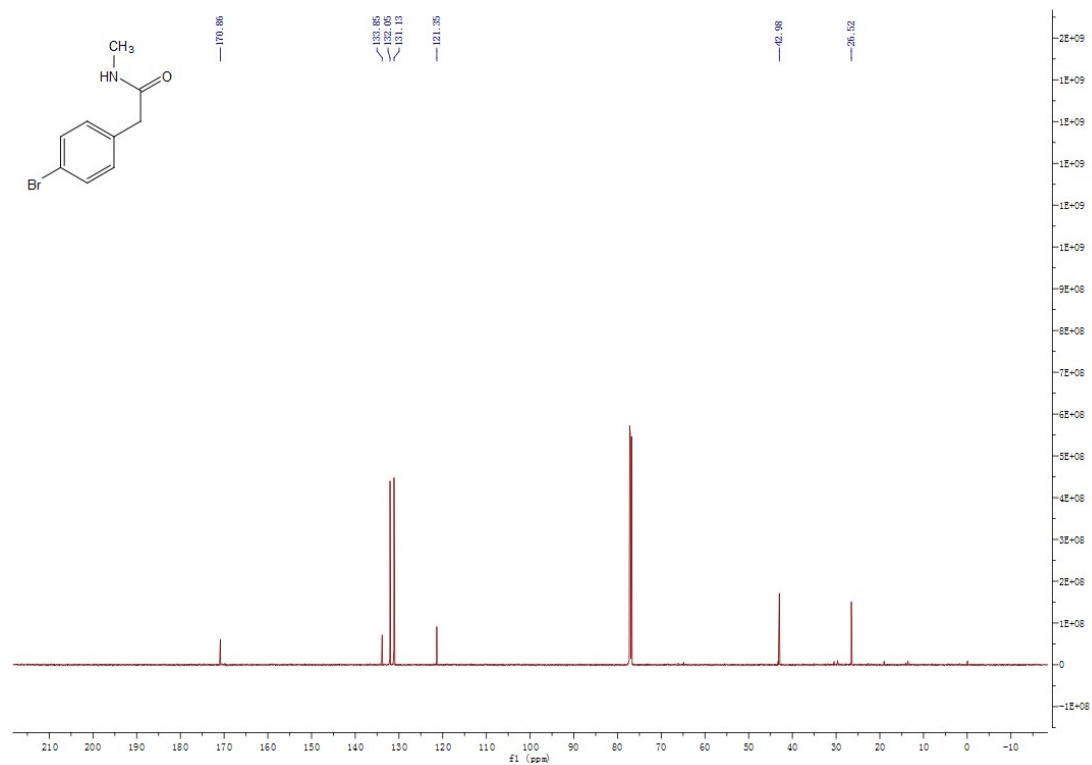

**<sup>1</sup>H NMR of 2-(2,5-dimethylphenyl)-N-methylacetamide (3g)**

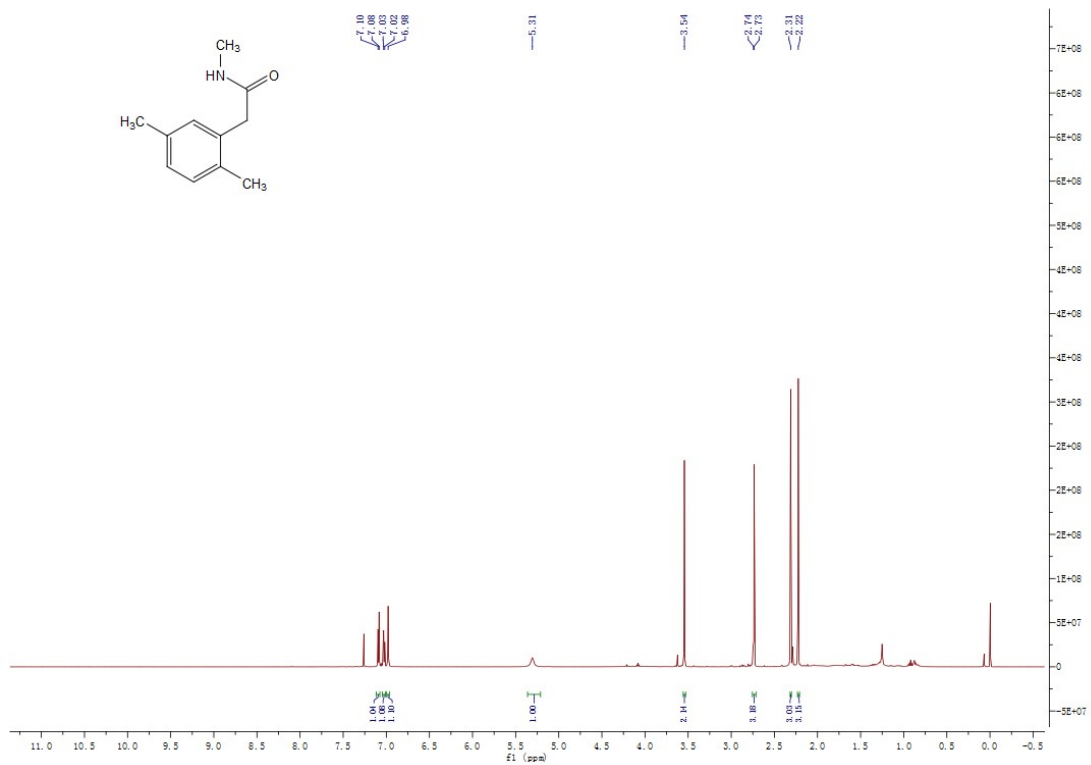

**<sup>13</sup>C NMR of 2-(2,5-dimethylphenyl)-N-methylacetamide (3g)**

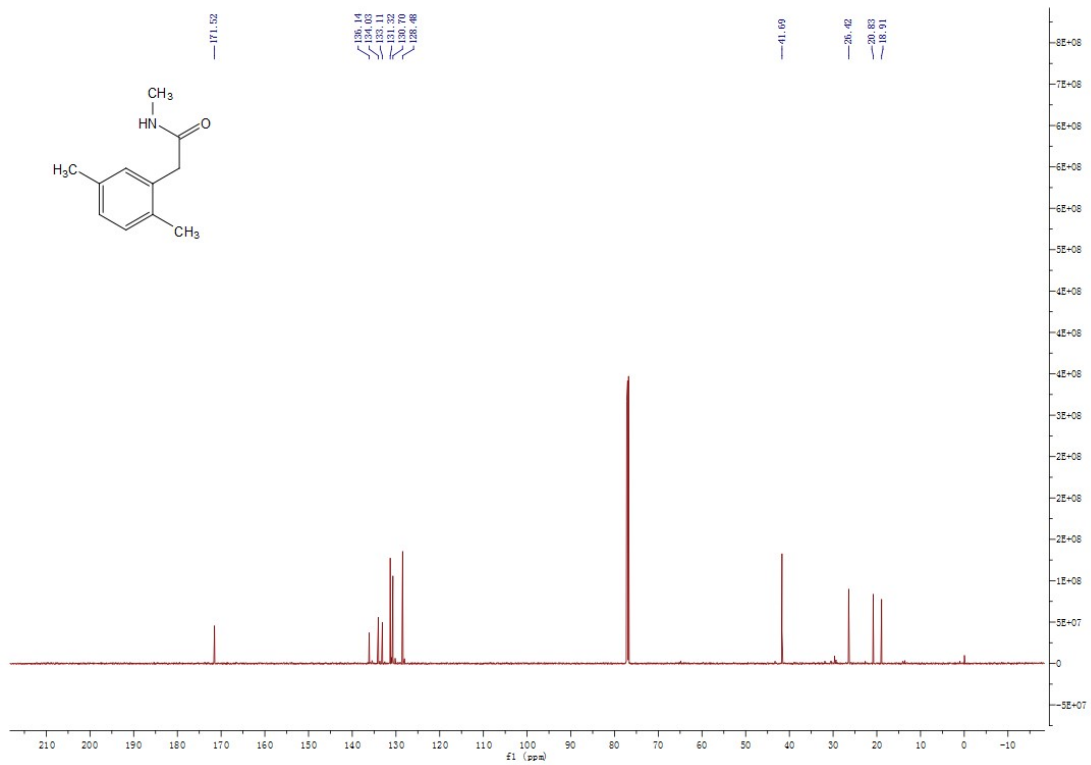

### <sup>1</sup>H NMR of 2-(3,5-dimethoxyphenyl)-N-methylacetamide (3h)

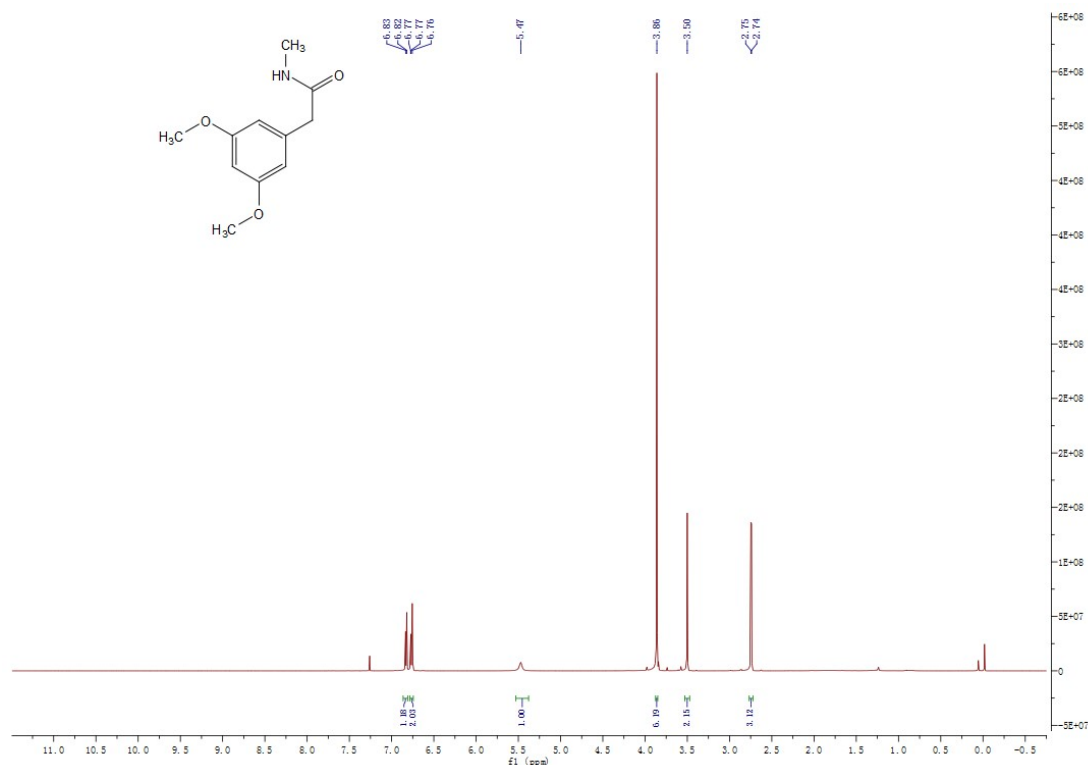

### <sup>13</sup>C NMR of 2-(3,5-dimethoxyphenyl)-N-methylacetamide (3h)

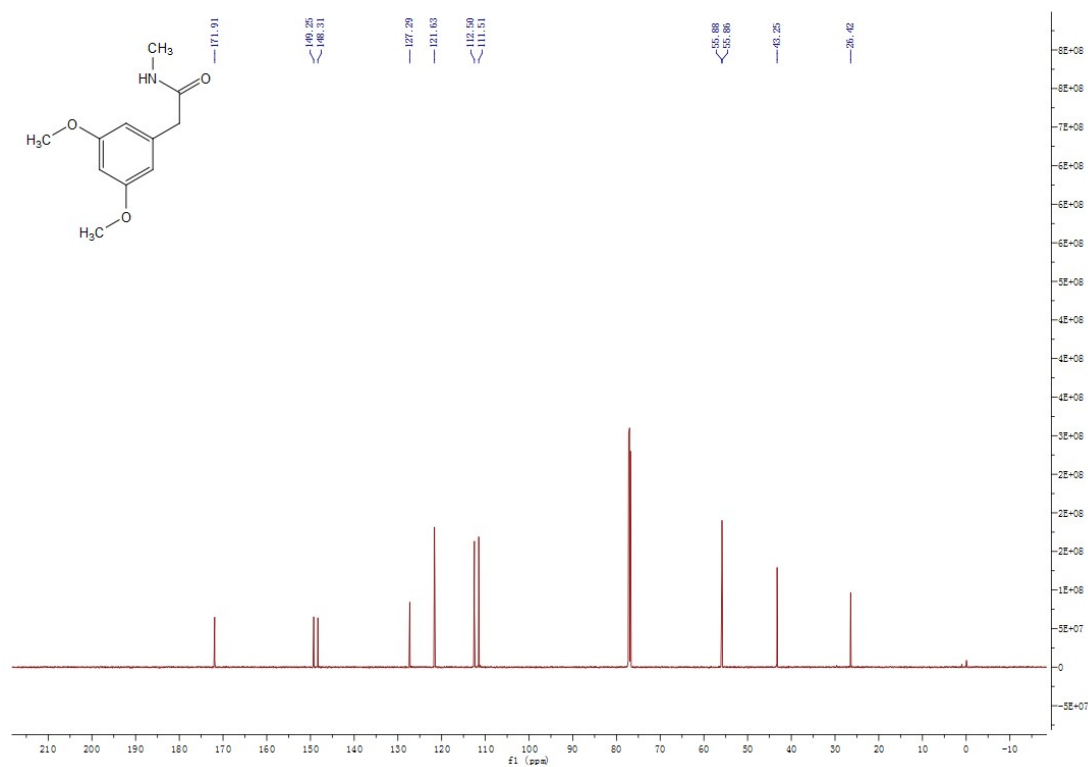

### <sup>1</sup>H NMR of 2-(2-hydroxyphenyl)-N-methylacetamide(3i)

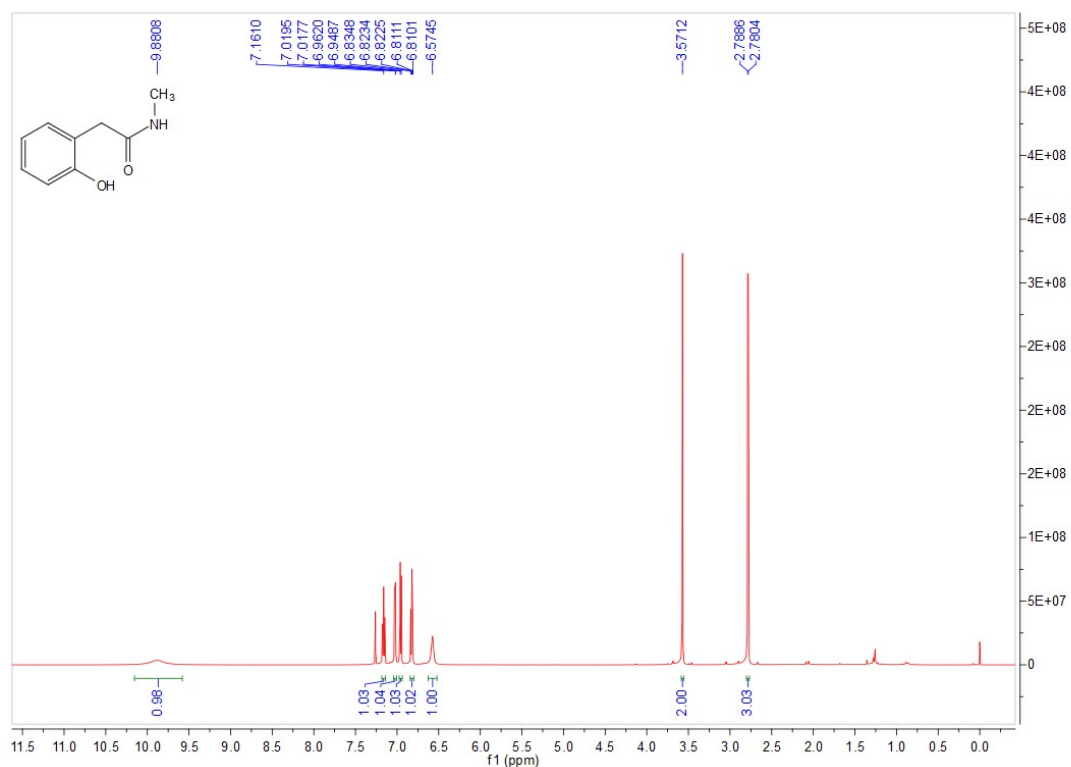

### <sup>13</sup>C NMR of 2-(2-hydroxyphenyl)-N-methylacetamide(3i)

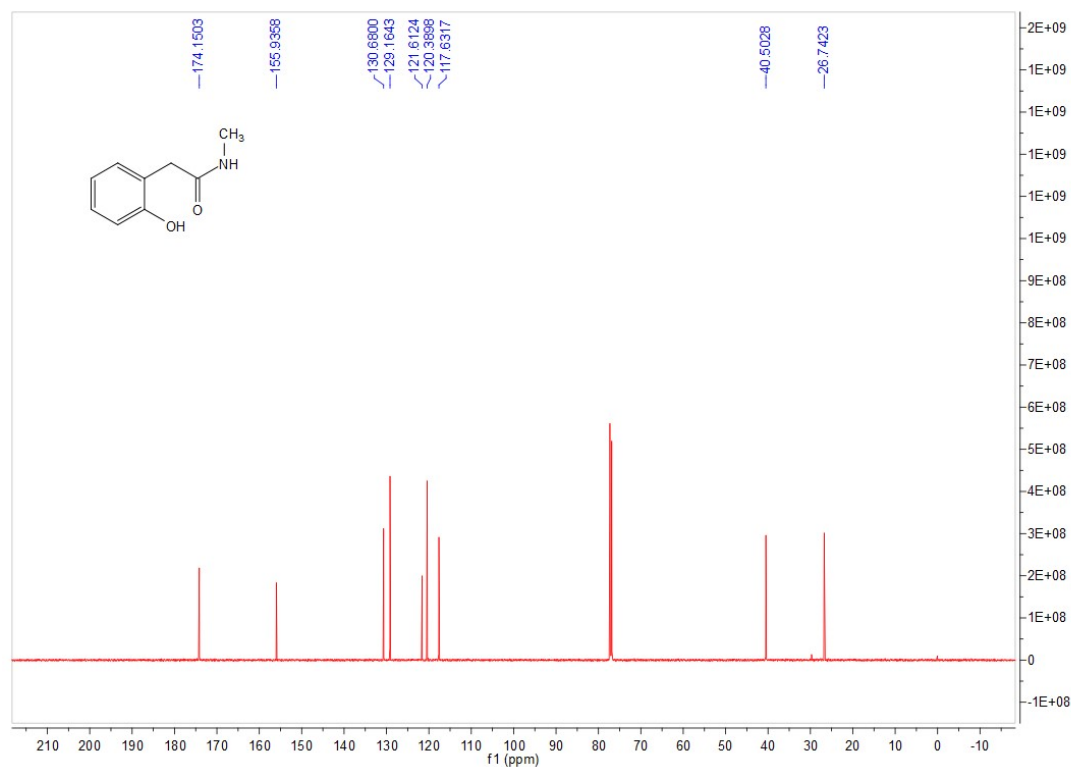

### <sup>1</sup>H NMR of 2-(3-hydroxy-4-methoxyphenyl)-N-methylacetamide(3j)

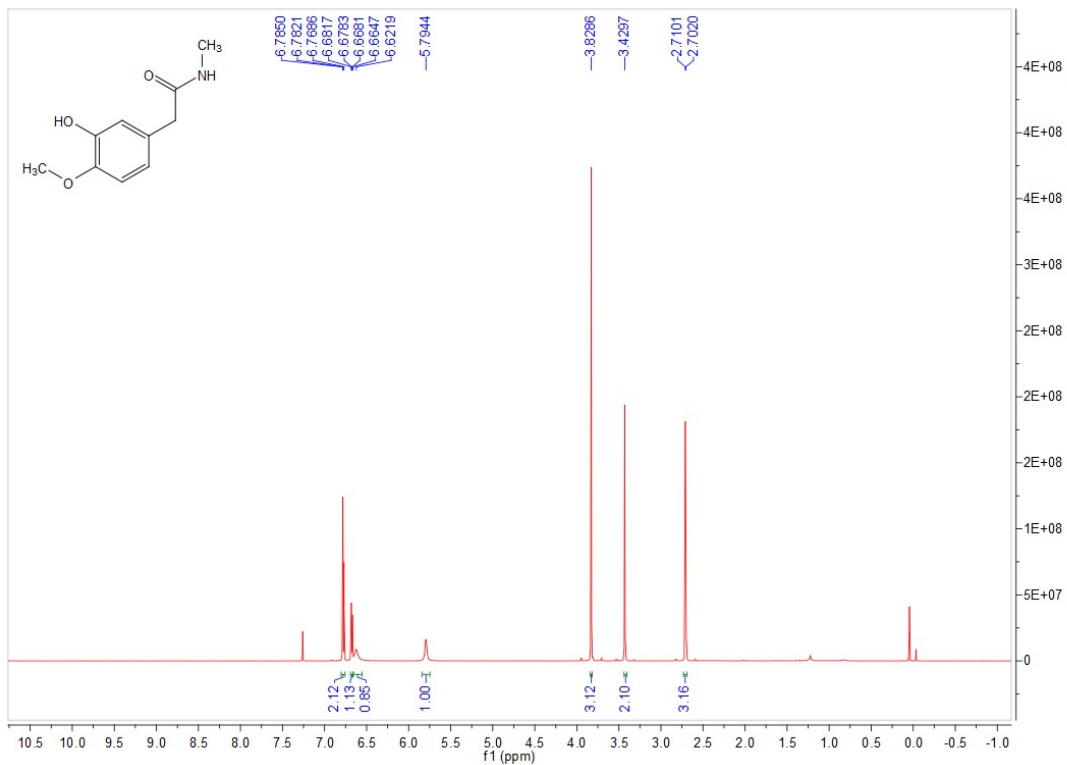

**<sup>13</sup>C NMR of 2-(3-hydroxy-4-methoxyphenyl)-N-methylacetamide(3j)**

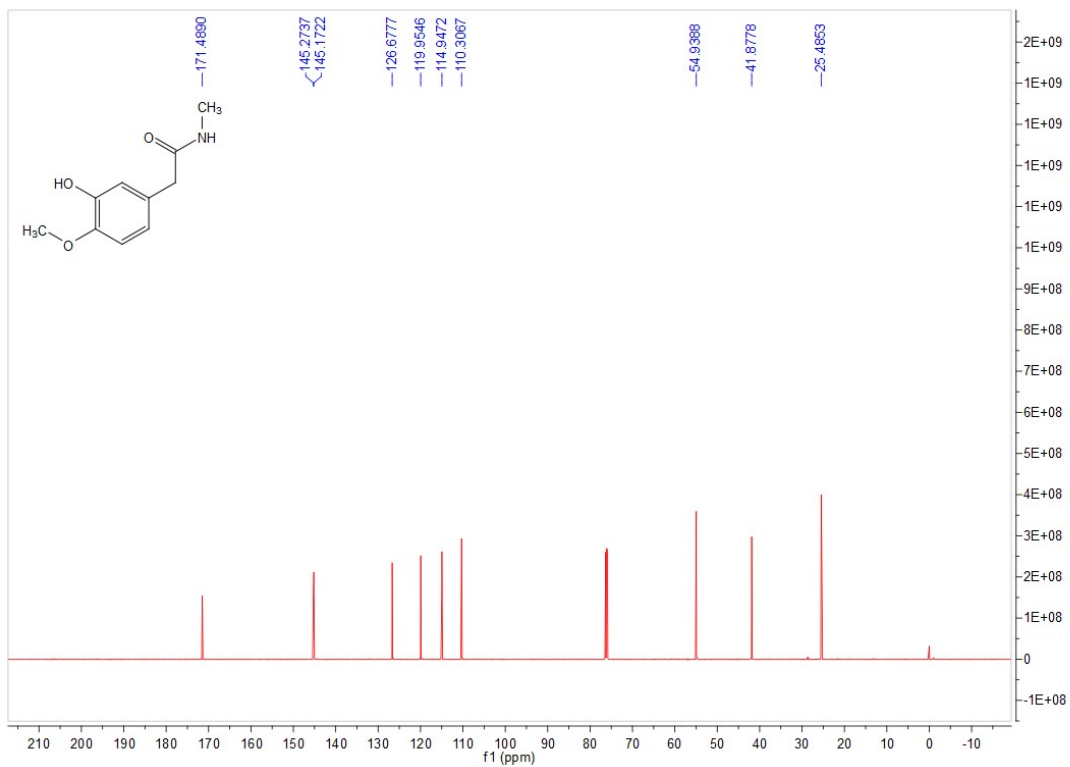

### <sup>1</sup>H NMR of N-methyl-2-(naphthalen-1-yl)acetamide (3k)

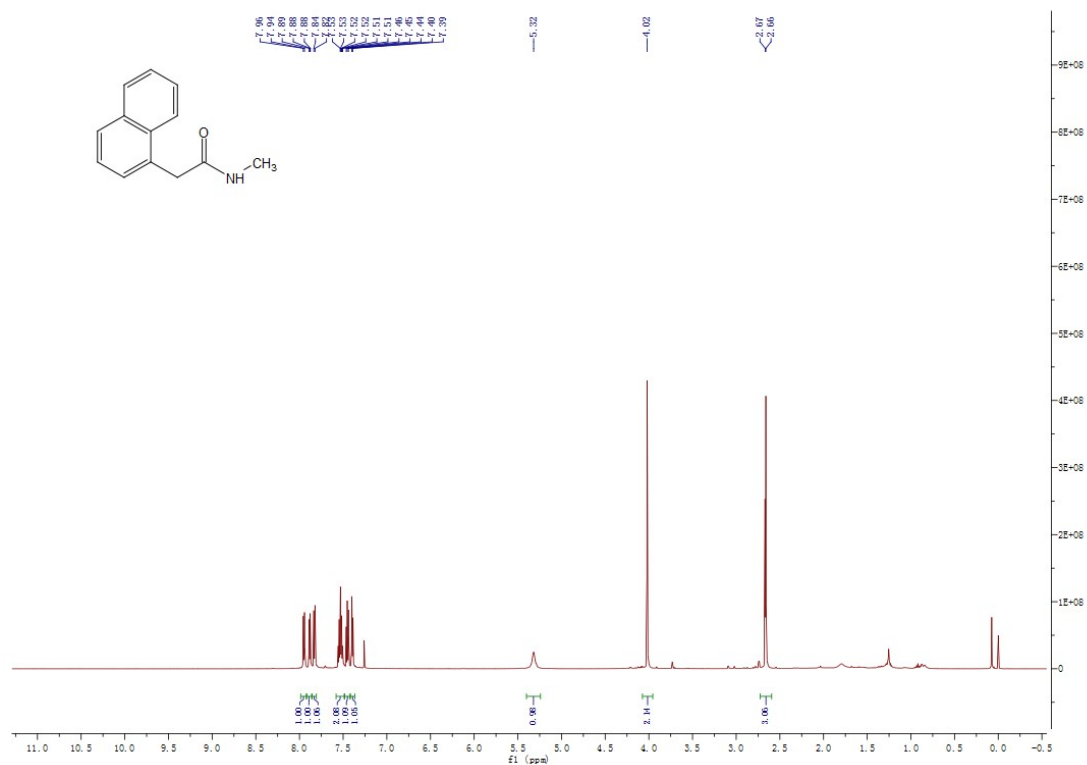

### <sup>13</sup>C NMR of N-methyl-2-(naphthalen-1-yl)acetamide (3k)

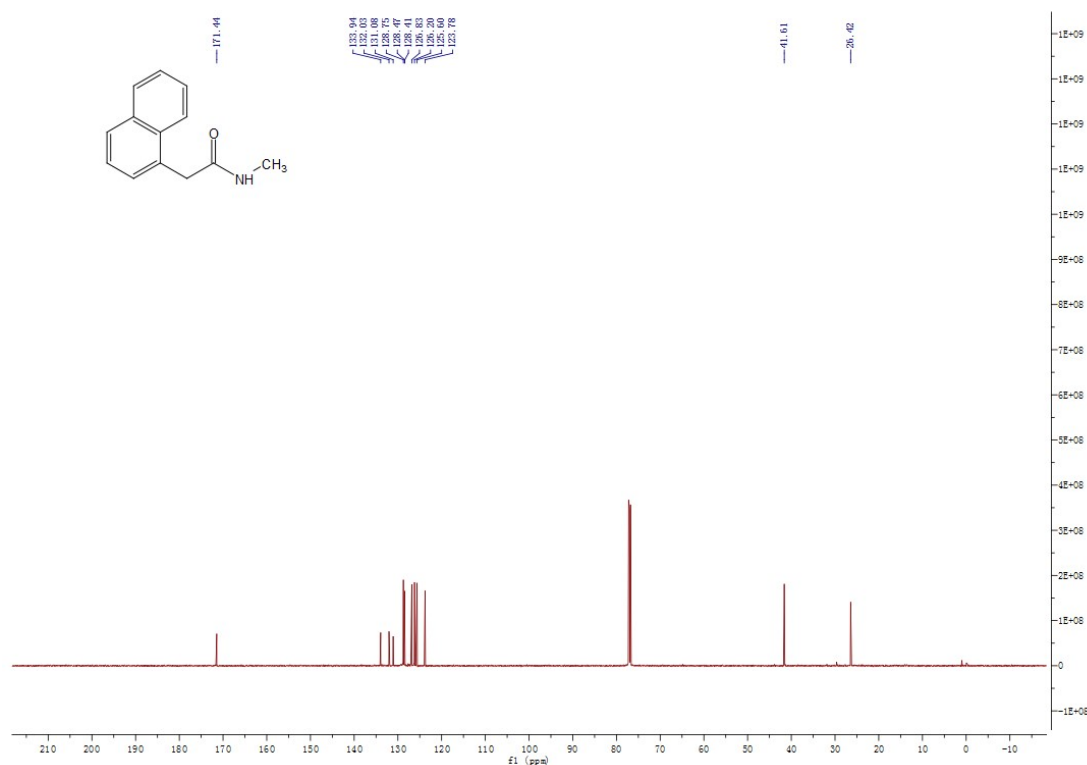



### <sup>1</sup>H NMR of N-methyl-2-(naphthalen-2-yl)acetamide (31)

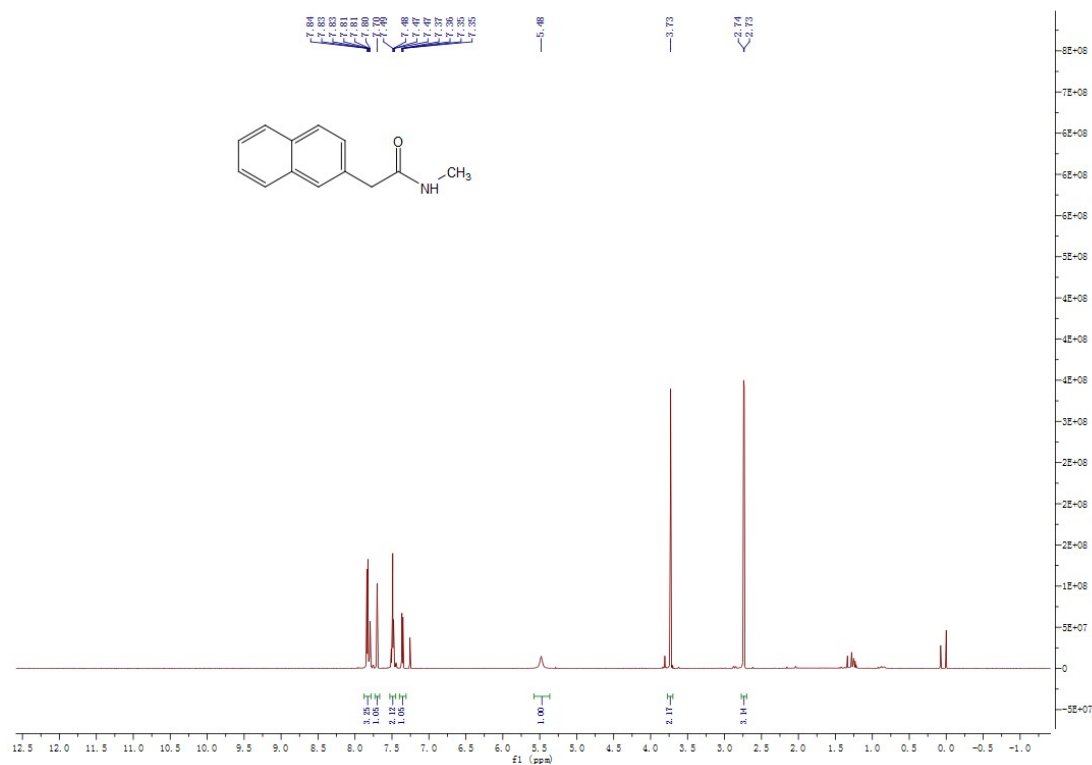

### <sup>13</sup>C NMR of N-methyl-2-(naphthalen-2-yl)acetamide (31)

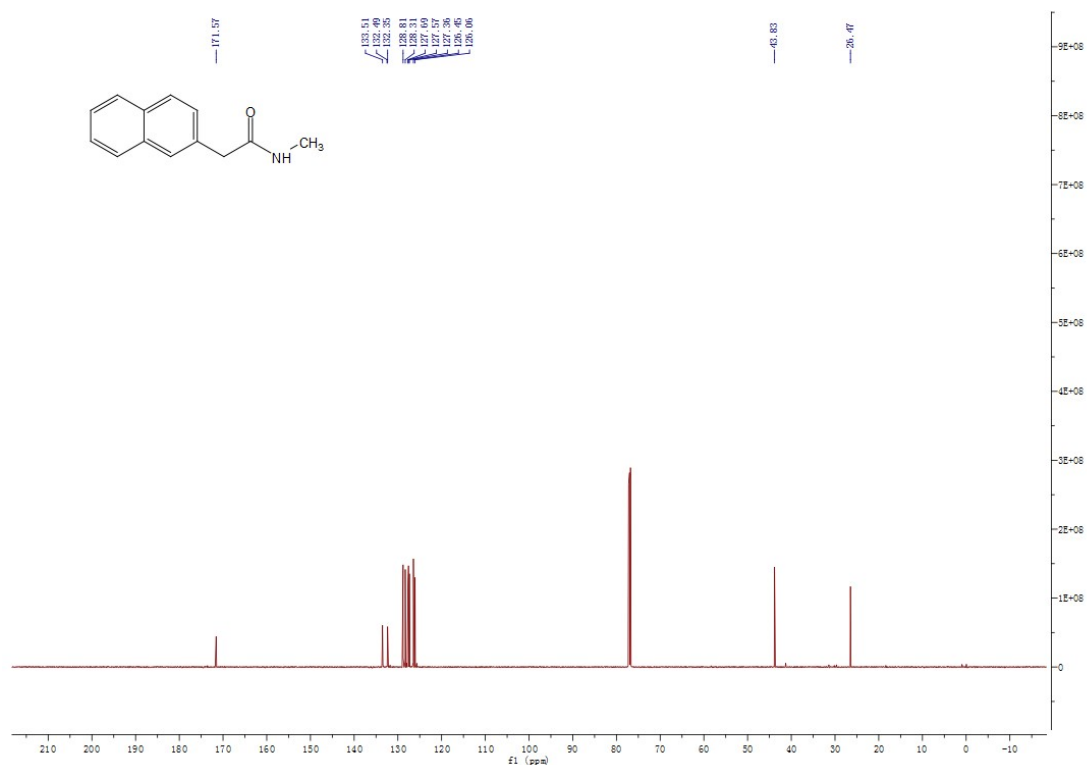

### <sup>1</sup>H NMR of N-methyl-3-phenylpropanamide (3m)

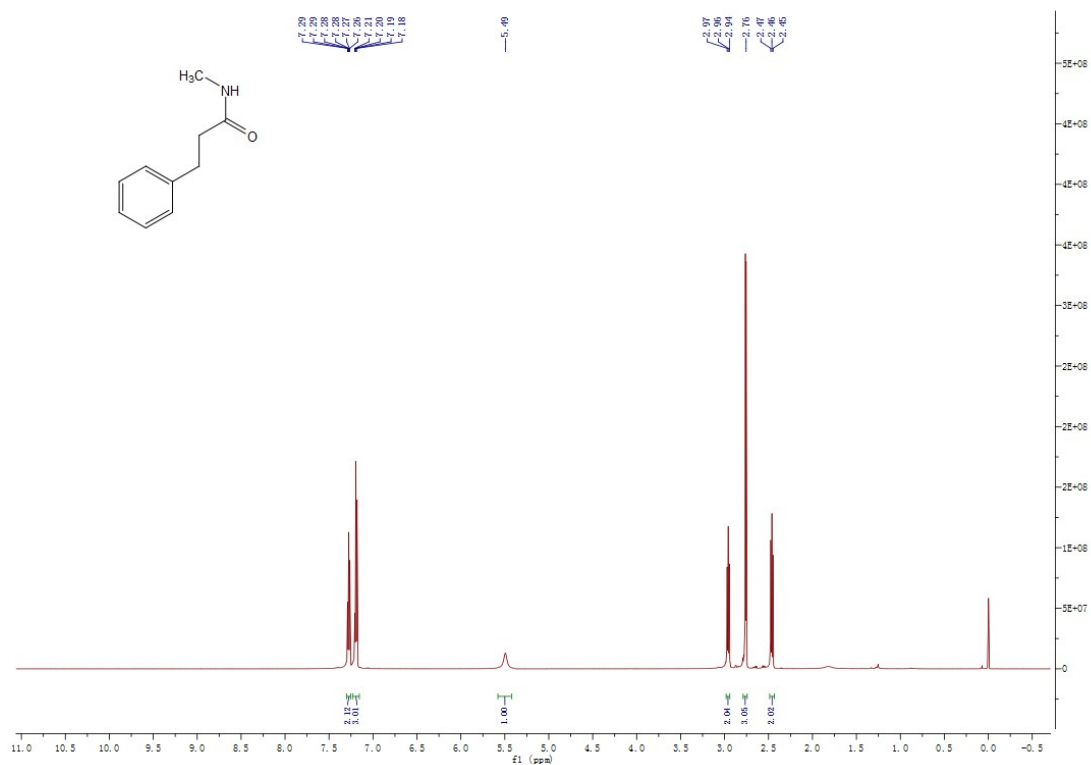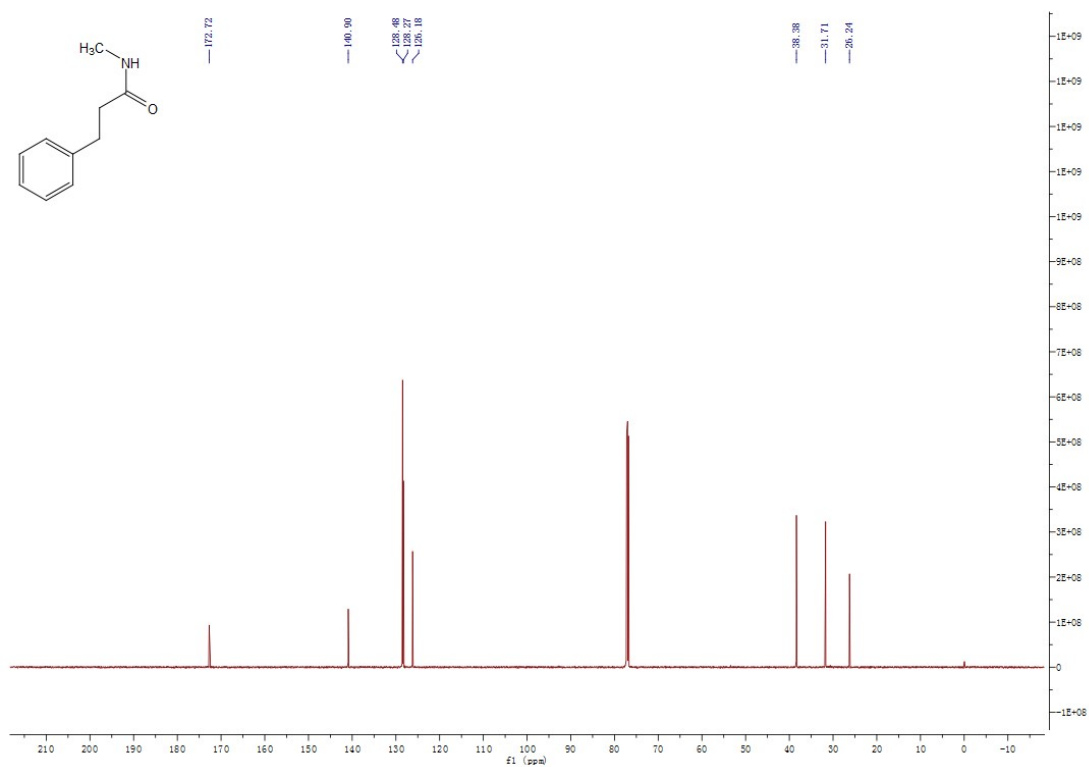

### <sup>1</sup>H NMR of (E)-N-methyl-3-(3,4,5-trimethoxyphenyl)acrylamide(3n)

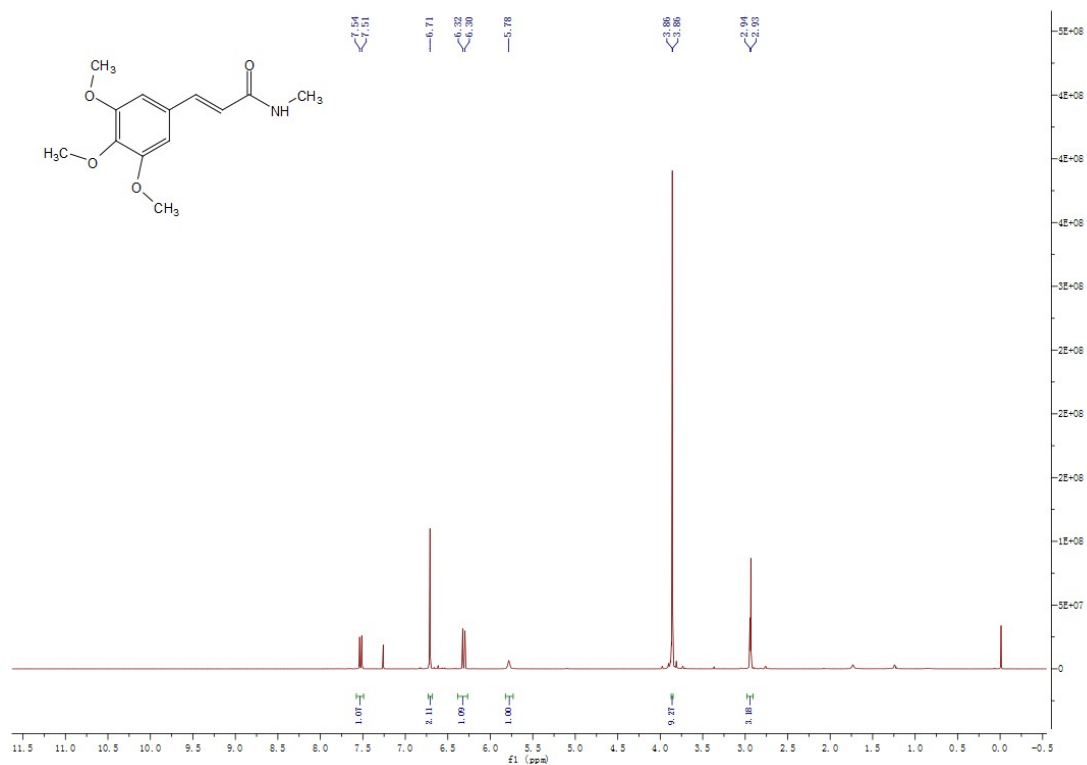

### <sup>13</sup>C NMR of (E)-N-methyl-3-(3,4,5-trimethoxyphenyl)acrylamide(3n)

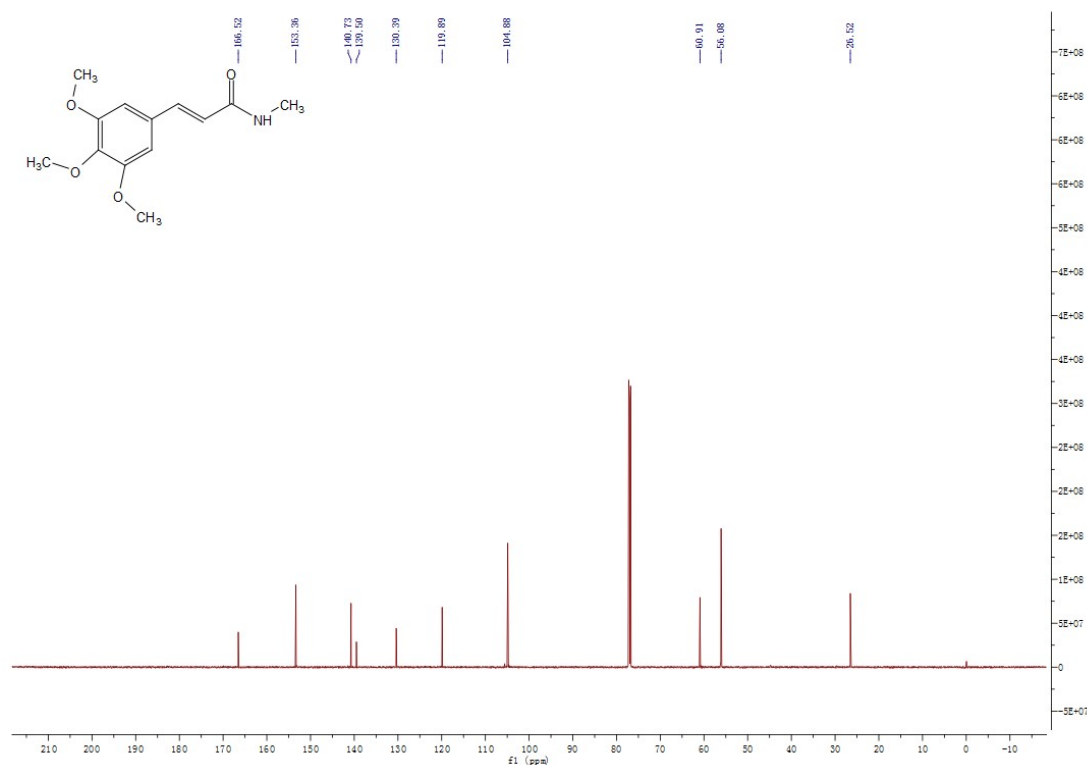

### <sup>1</sup>H NMR of N-methylpent-4-enamide(3o)

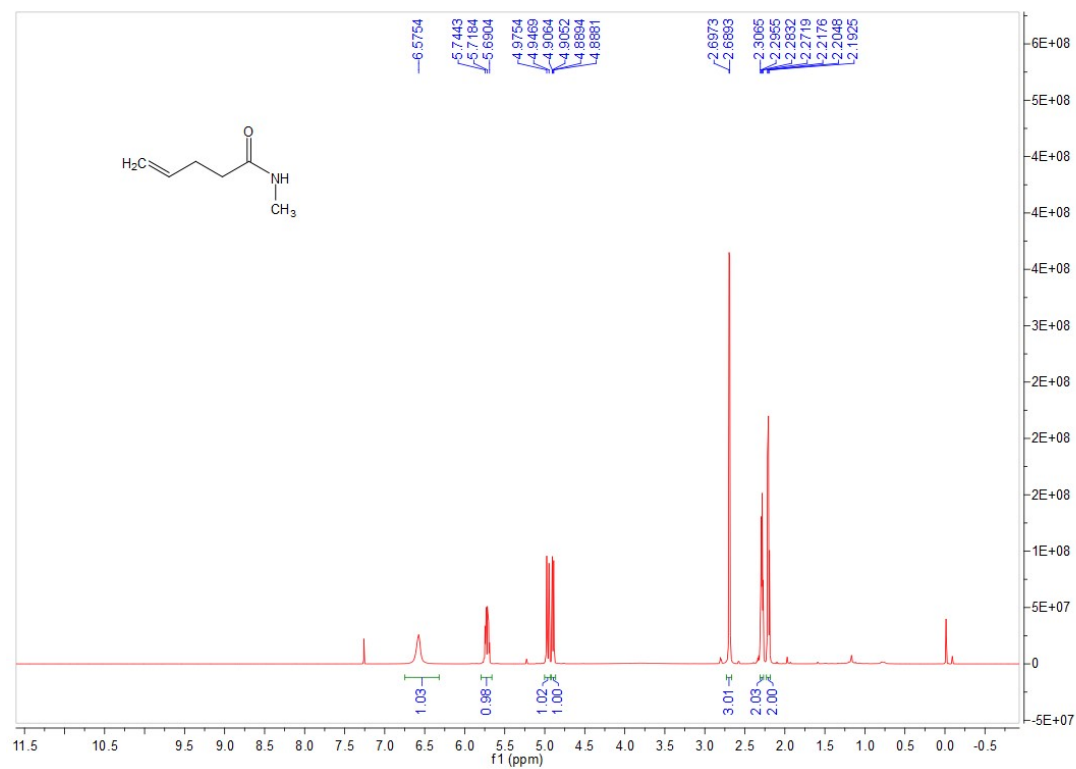

### <sup>13</sup>C NMR of N-methylpent-4-enamide(3o)

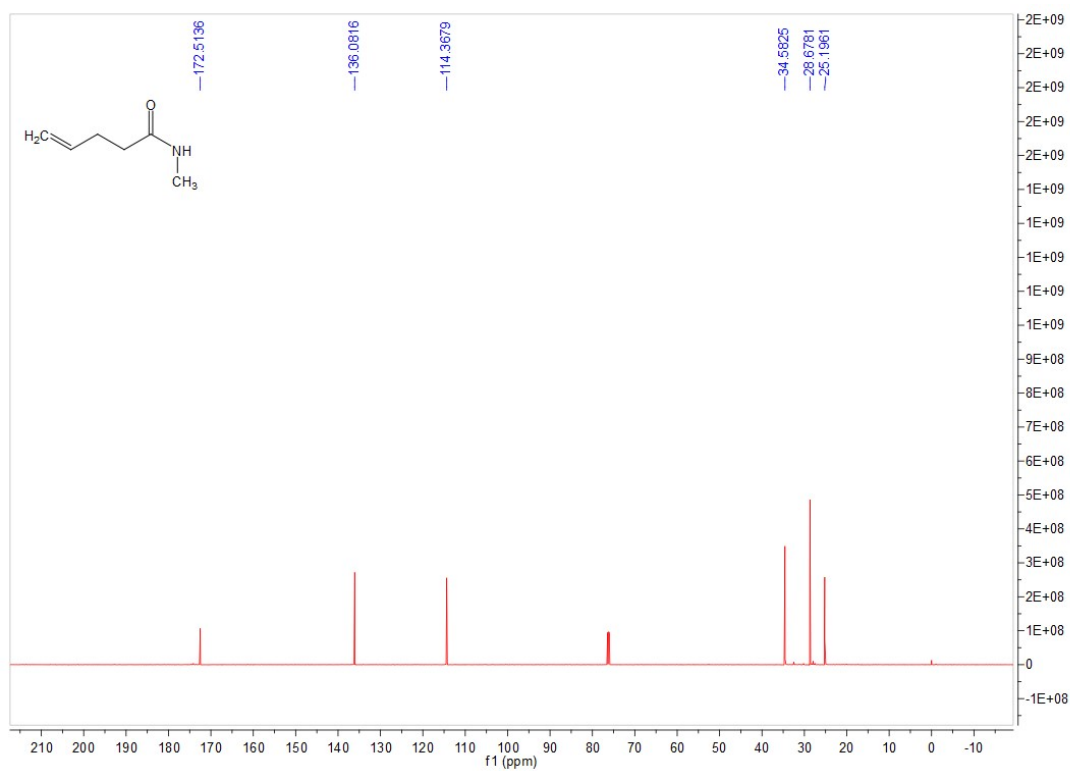

### <sup>1</sup>H NMR of N-methylpent-4-ynamide(3p)

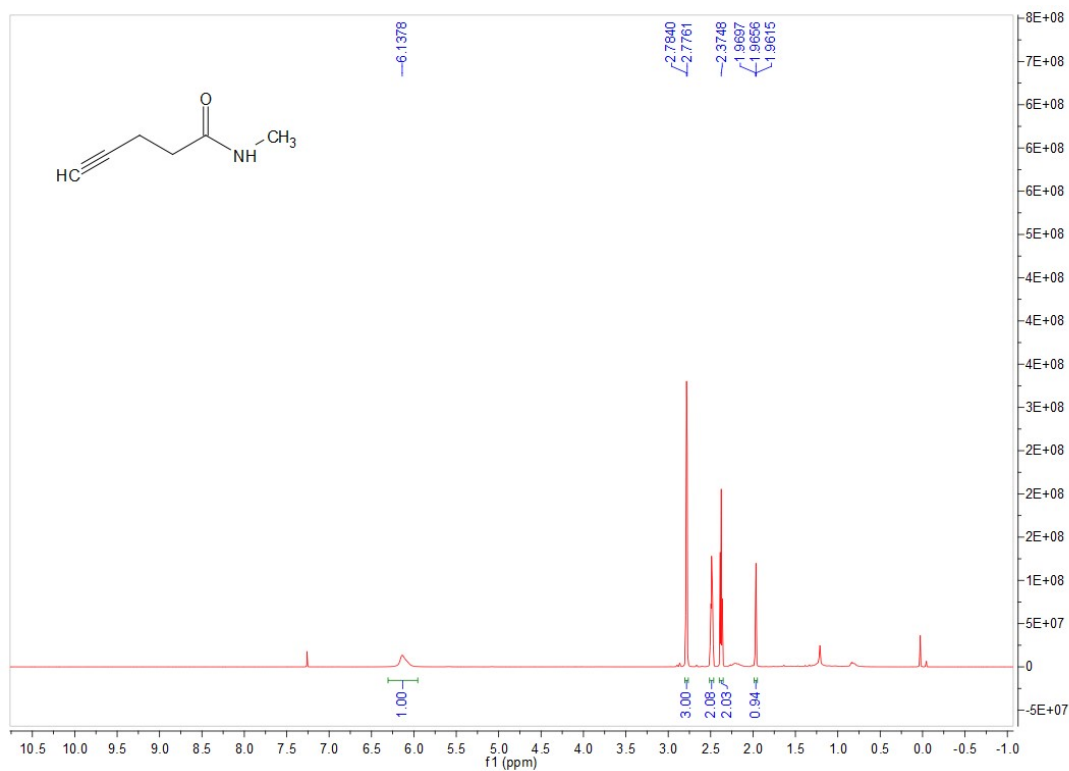

### <sup>13</sup>C NMR of N-methylpent-4-ynamide(3p)

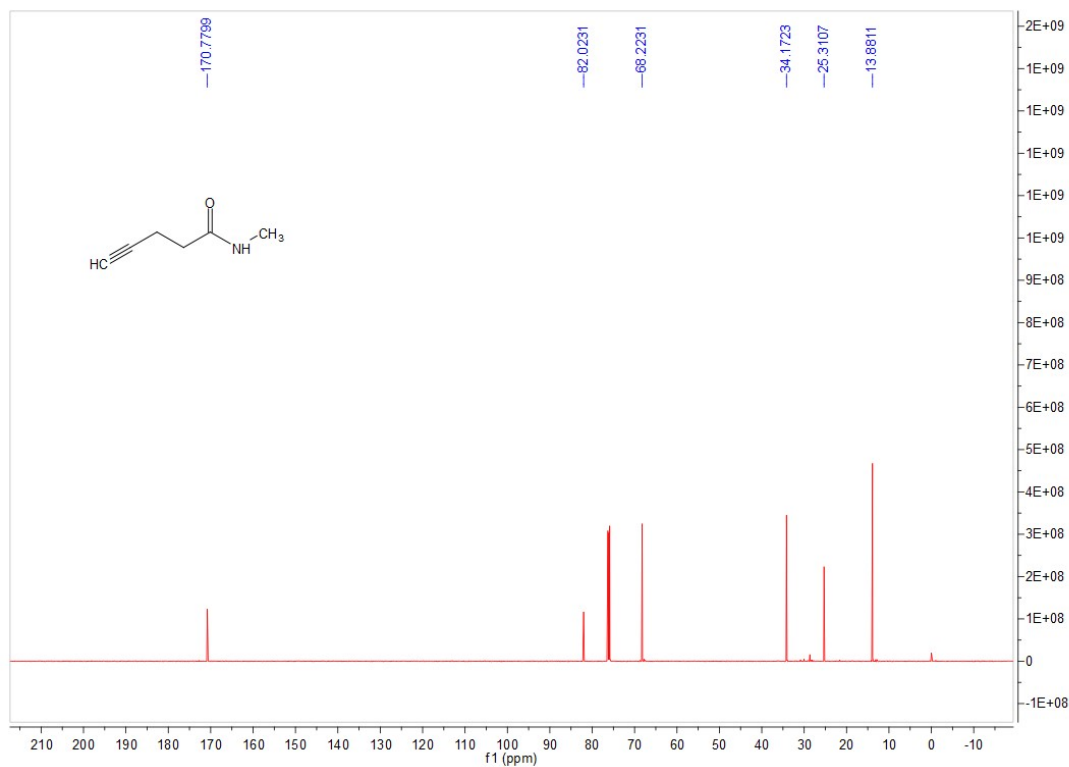

### <sup>1</sup>H NMR of N-methyl-2-phenylpropanamide(3q)

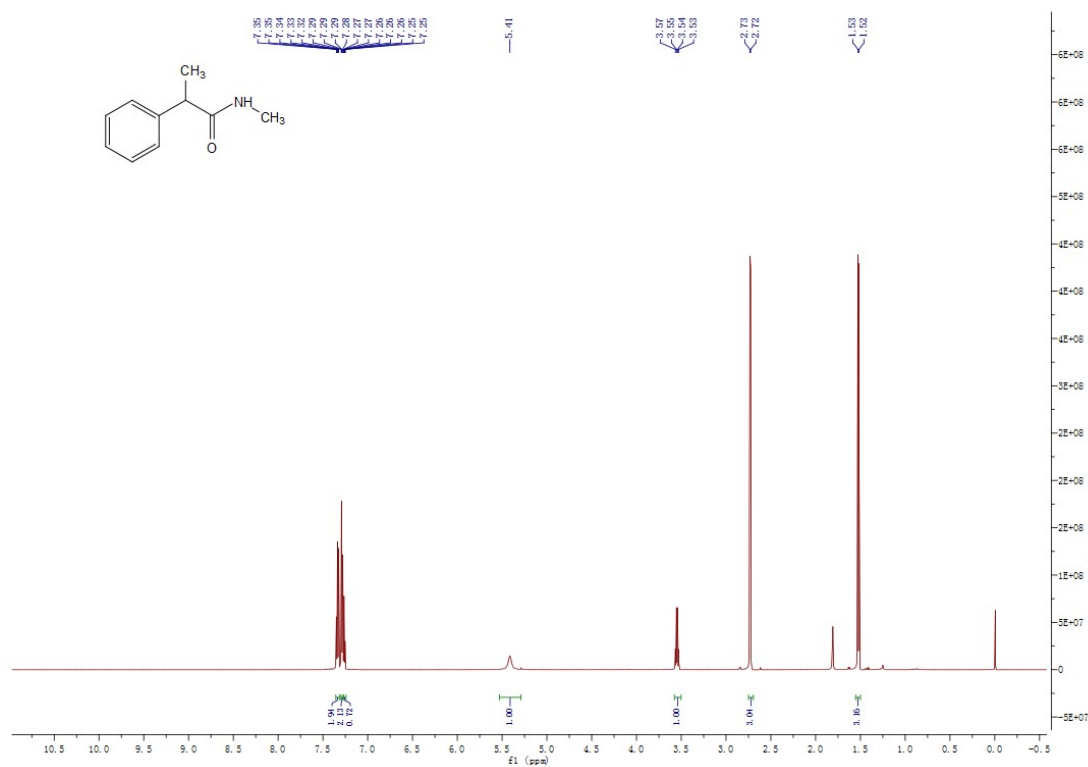

### <sup>13</sup>C NMR of N-methyl-2-phenylpropanamide(3q)

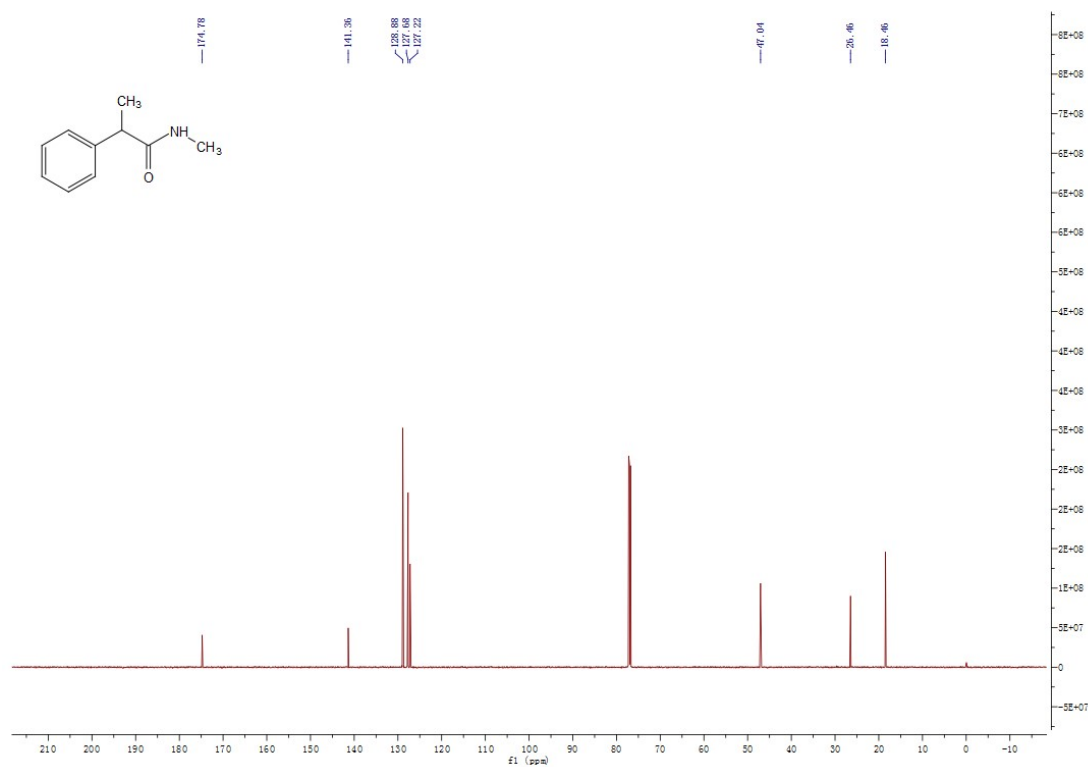

### <sup>1</sup>H NMR of 2-(2,4-dichlorophenoxy)-N-methylpropanamide(3r)

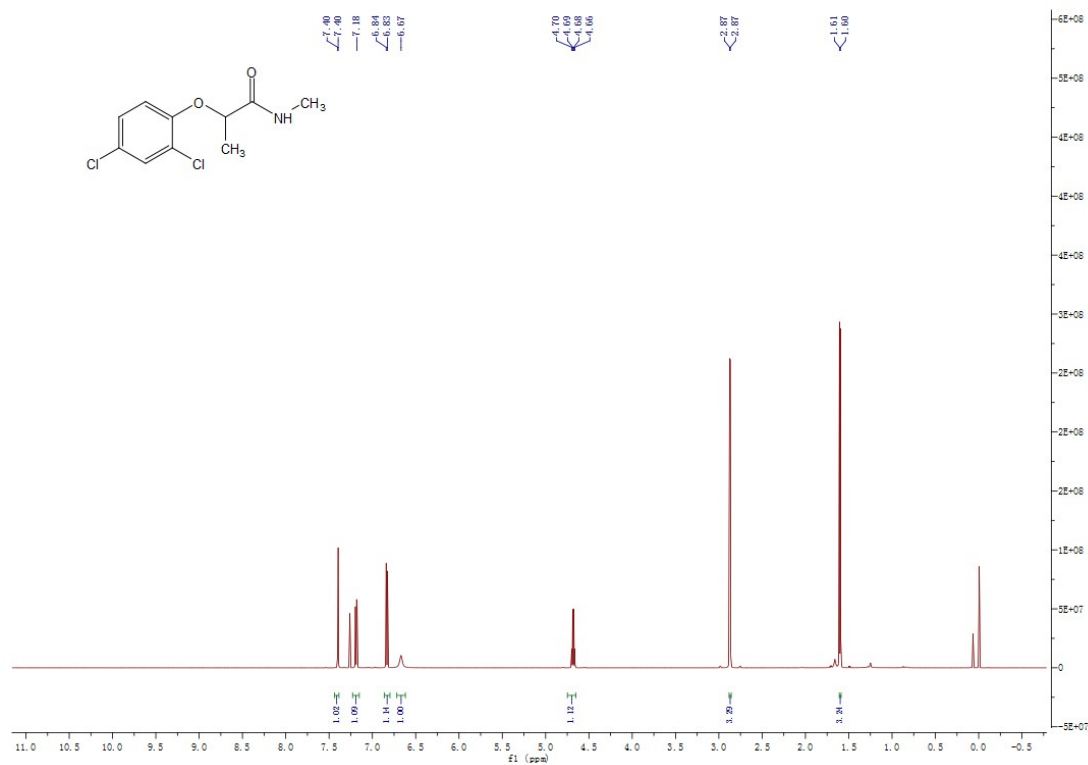

### <sup>13</sup>C NMR of 2-(2,4-dichlorophenoxy)-N-methylpropanamide(3r)

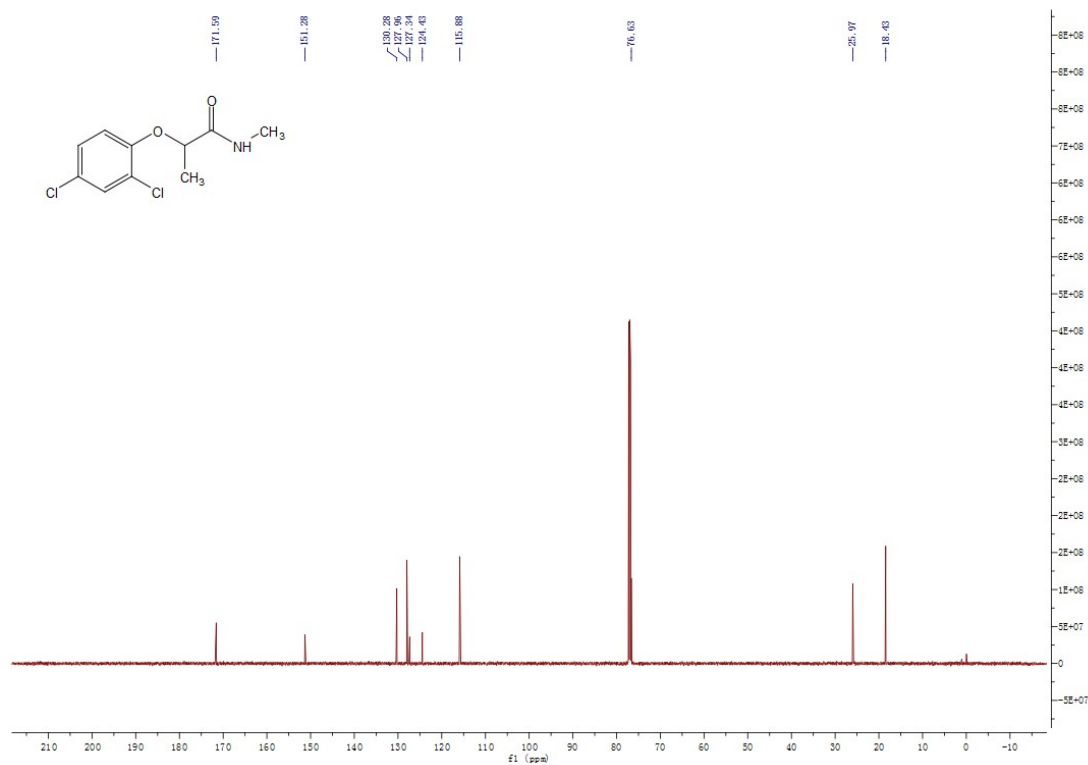

**<sup>1</sup>H NMR of 2-(1-(4-chlorobenzoyl)-5-methoxy-2-methyl-1H-indol-3-yl)-N-methylacetamide(3s):**

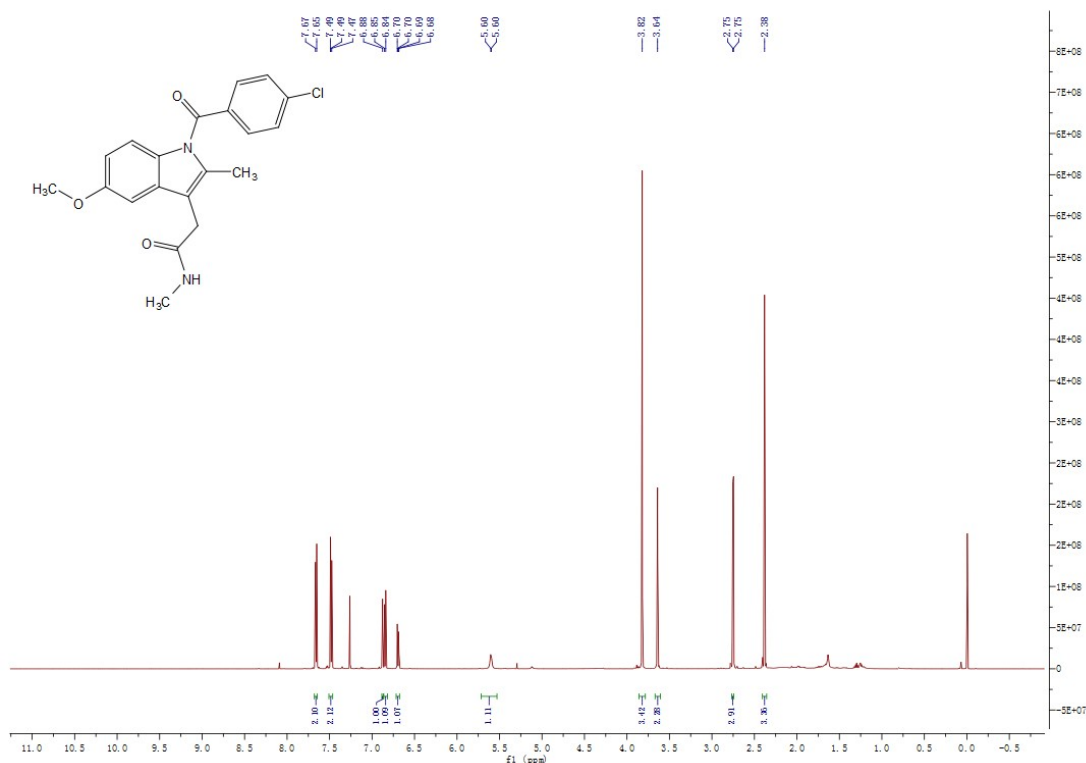

**<sup>13</sup>C NMR of 2-(1-(4-chlorobenzoyl)-5-methoxy-2-methyl-1H-indol-3-yl)-N-methylacetamide(3s):**

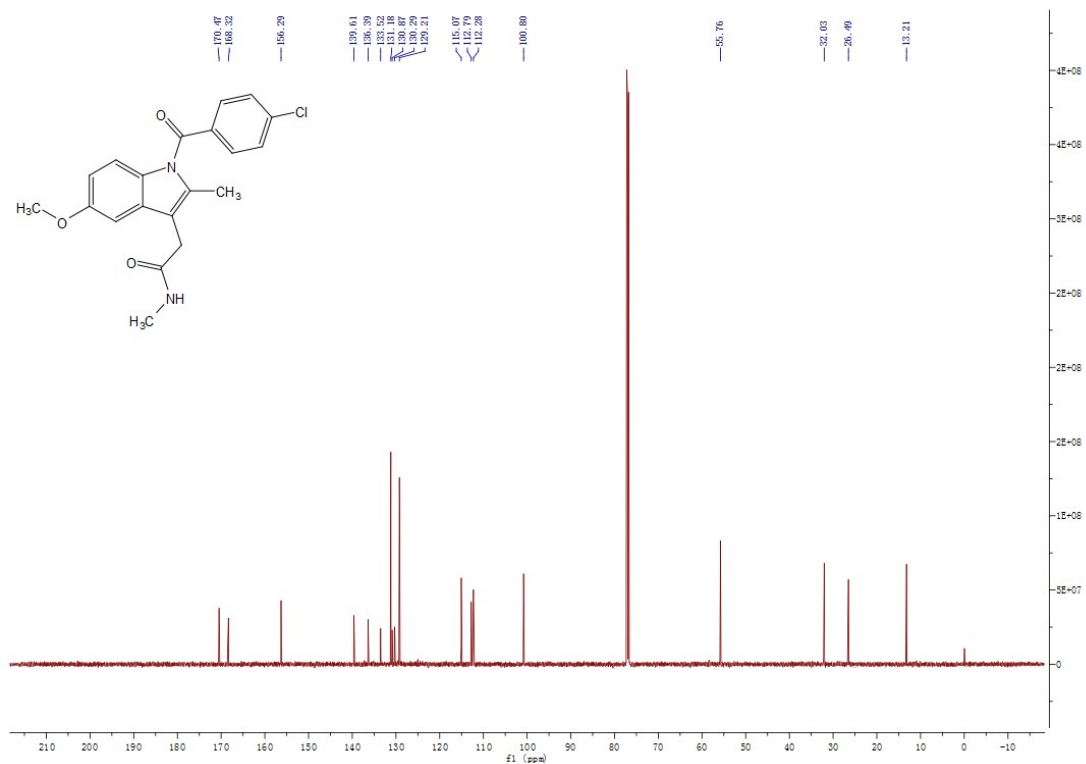



### <sup>1</sup>H NMR of 2-(3-benzoylphenyl)-N-methylpropanamide(3t)

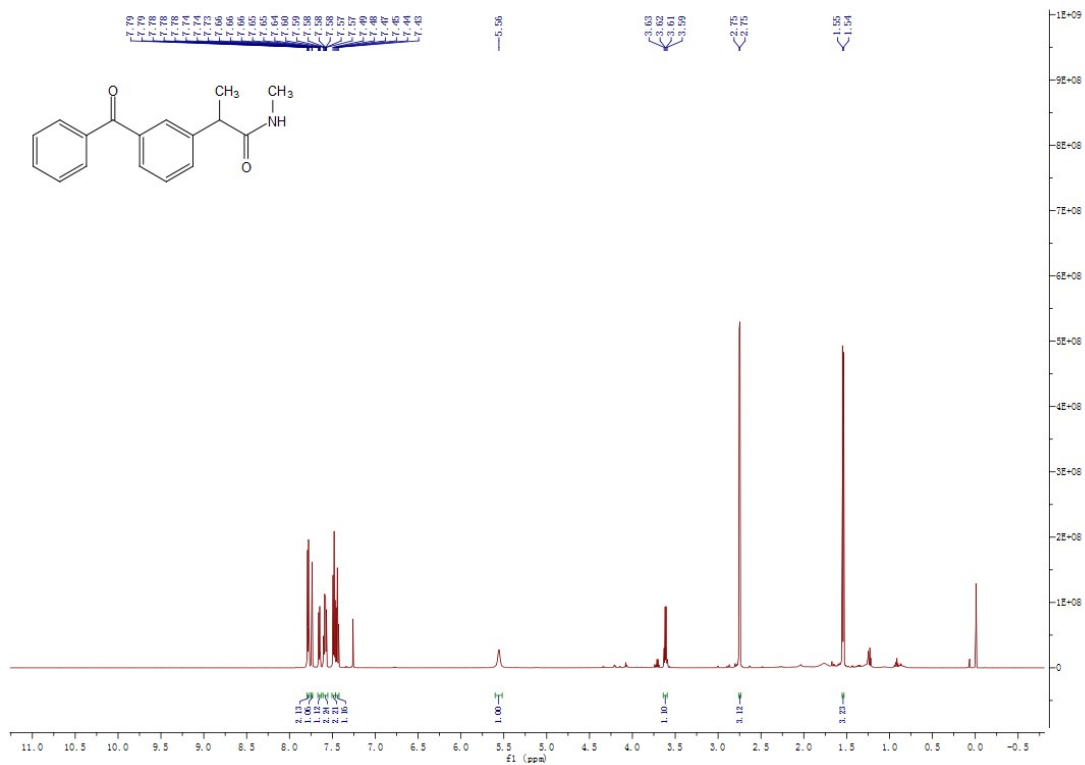

### <sup>13</sup>C NMR of 2-(3-benzoylphenyl)-N-methylpropanamide(3t)

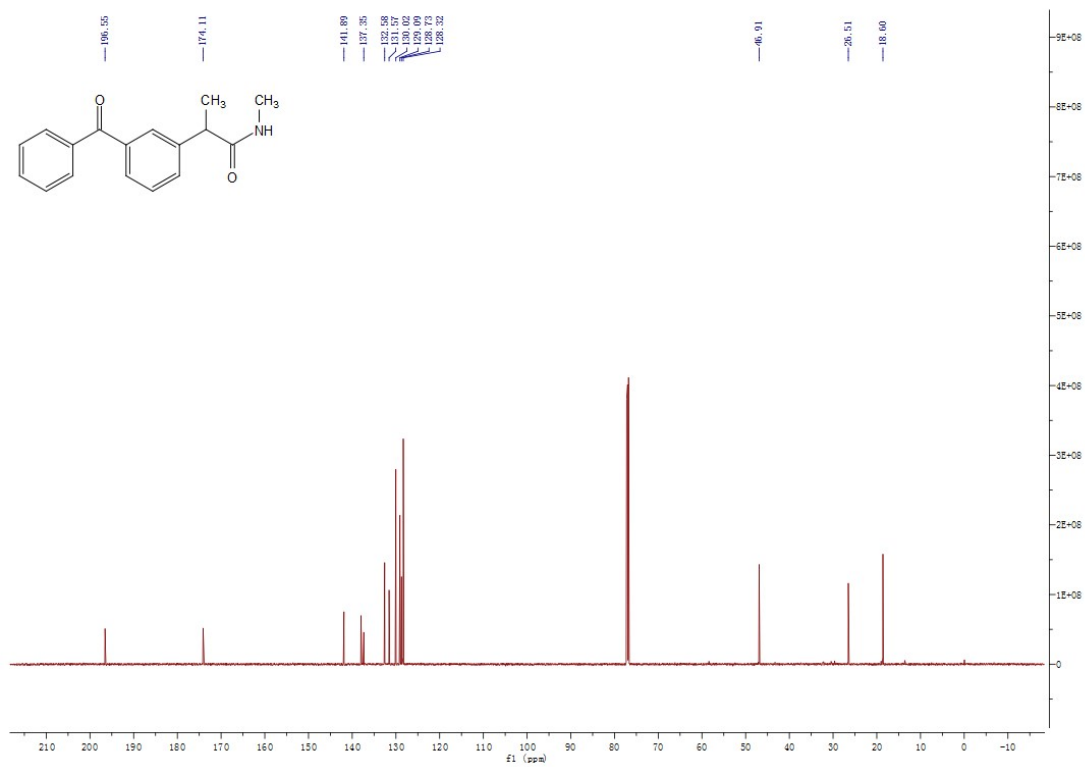

### <sup>1</sup>H NMR of 2-(6-methoxynaphthalen-2-yl)-N-methylpropanamide(3u)

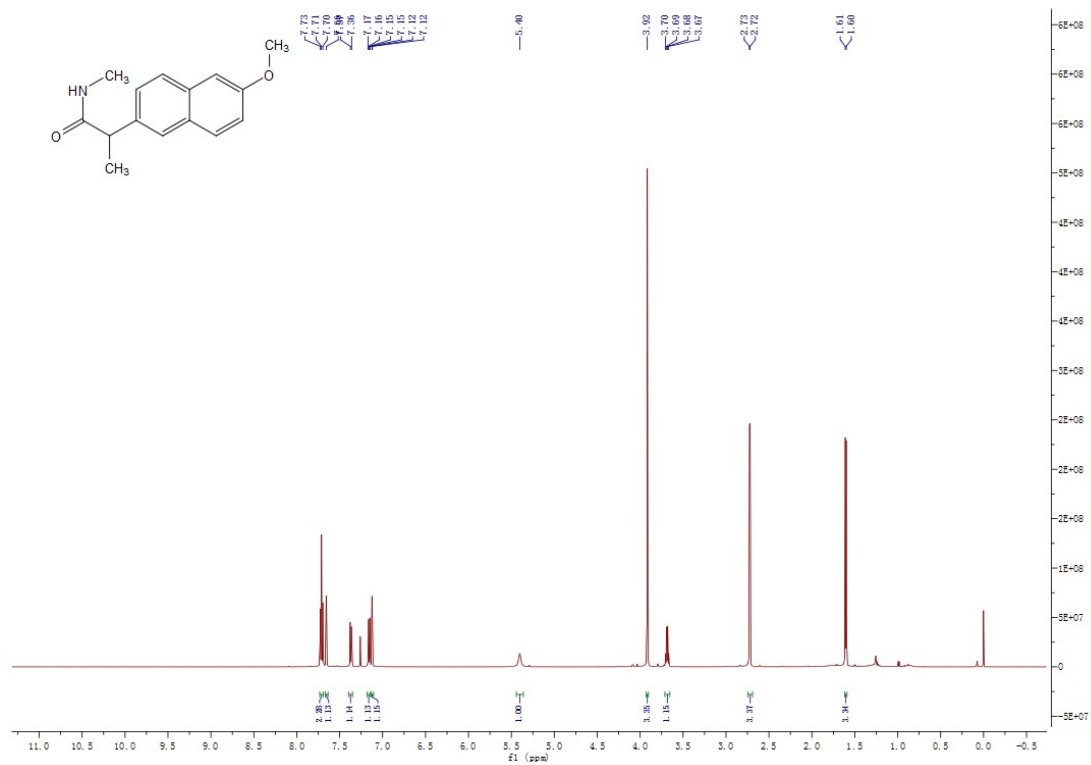

### <sup>13</sup>C NMR of 2-(6-methoxynaphthalen-2-yl)-N-methylpropanamide(3u)

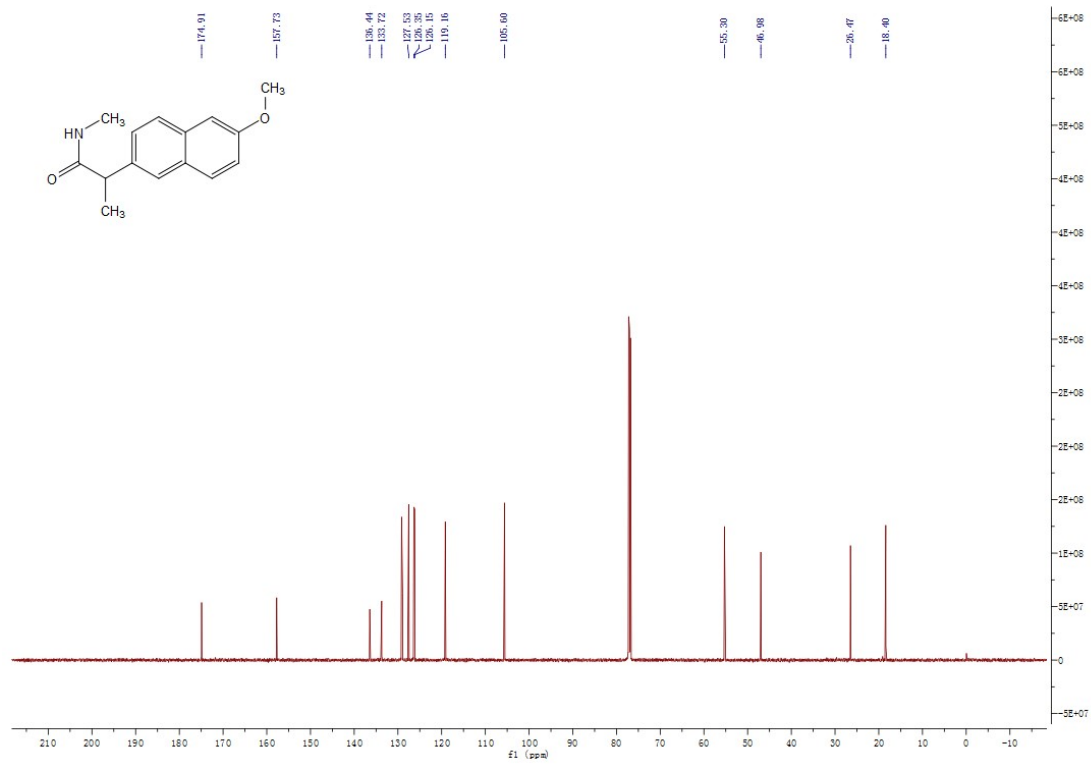

### <sup>1</sup>H NMR of N-benzyl-2-phenylacetamide (3v)

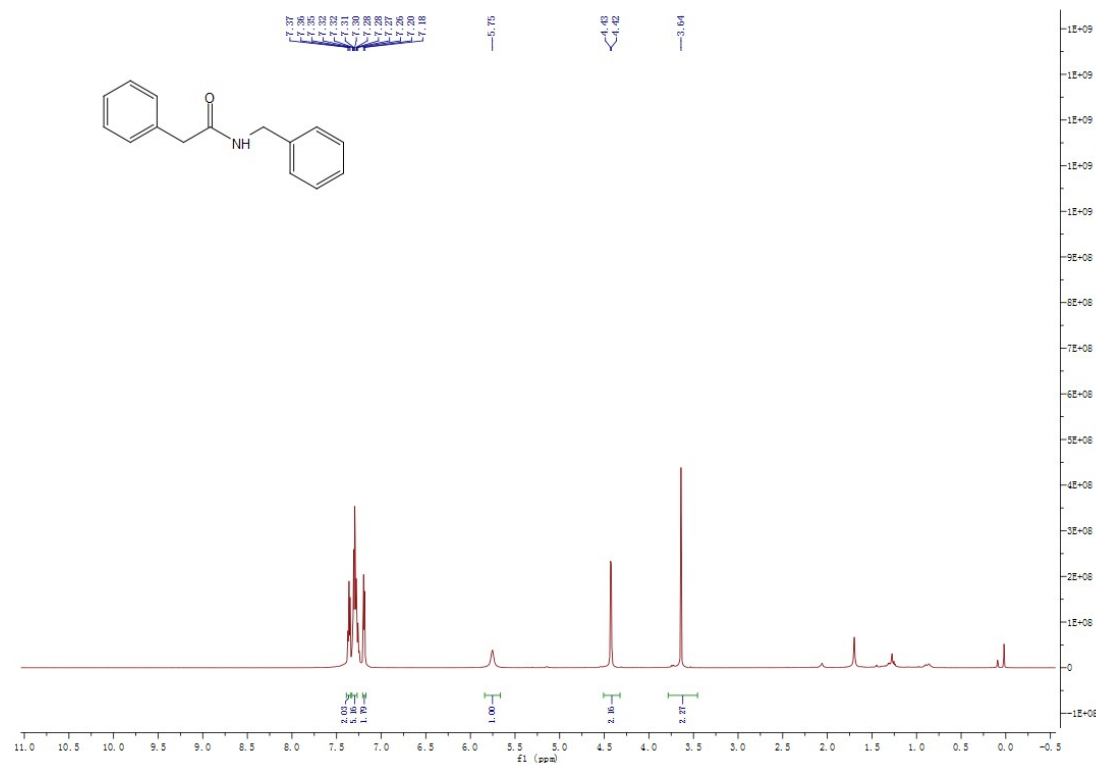

### <sup>13</sup>C NMR of N-benzyl-2-phenylacetamide (3v)

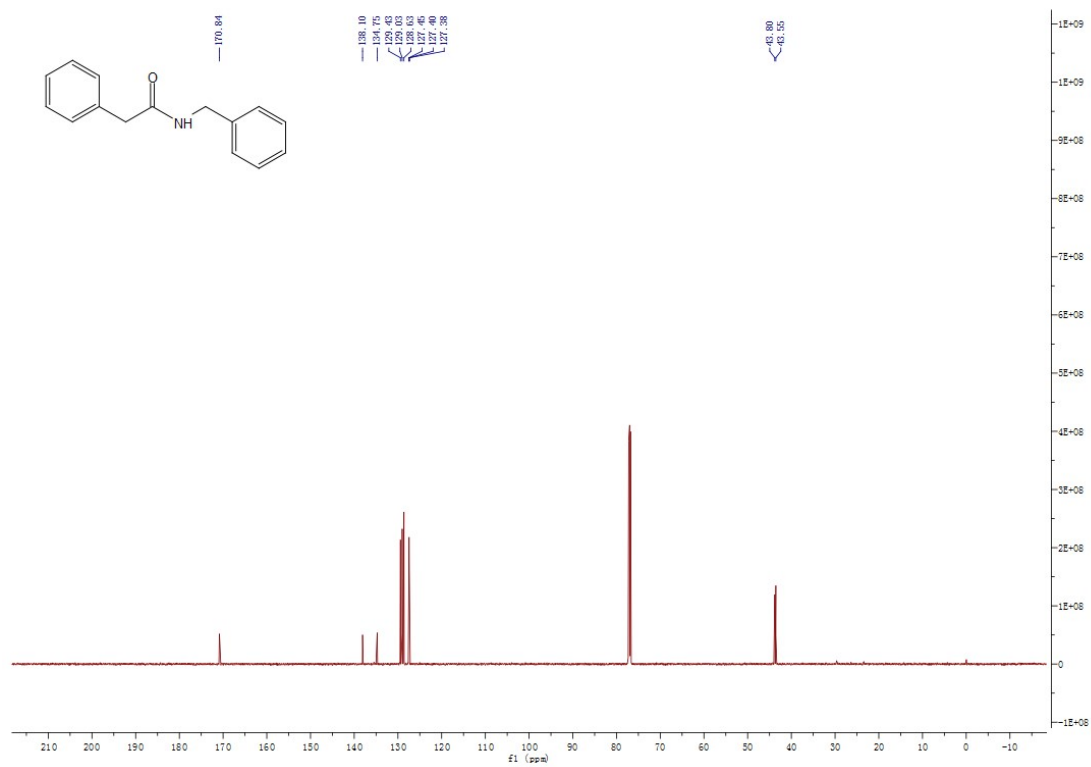

### <sup>1</sup>H NMR of 2-(benzo[d][1,3]dioxol-5-yl)-N-(1-phenylethyl)acetamide (3w)

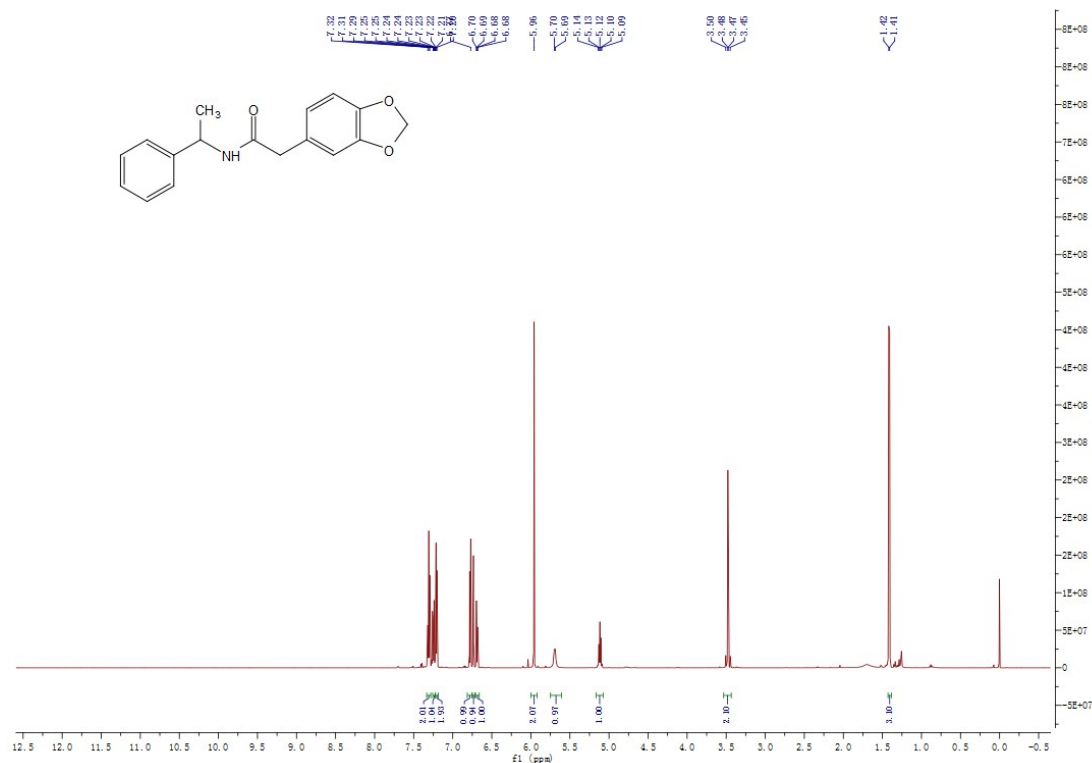

### <sup>13</sup>C NMR of 2-(benzo[d][1,3]dioxol-5-yl)-N-(1-phenylethyl)acetamide (3w)

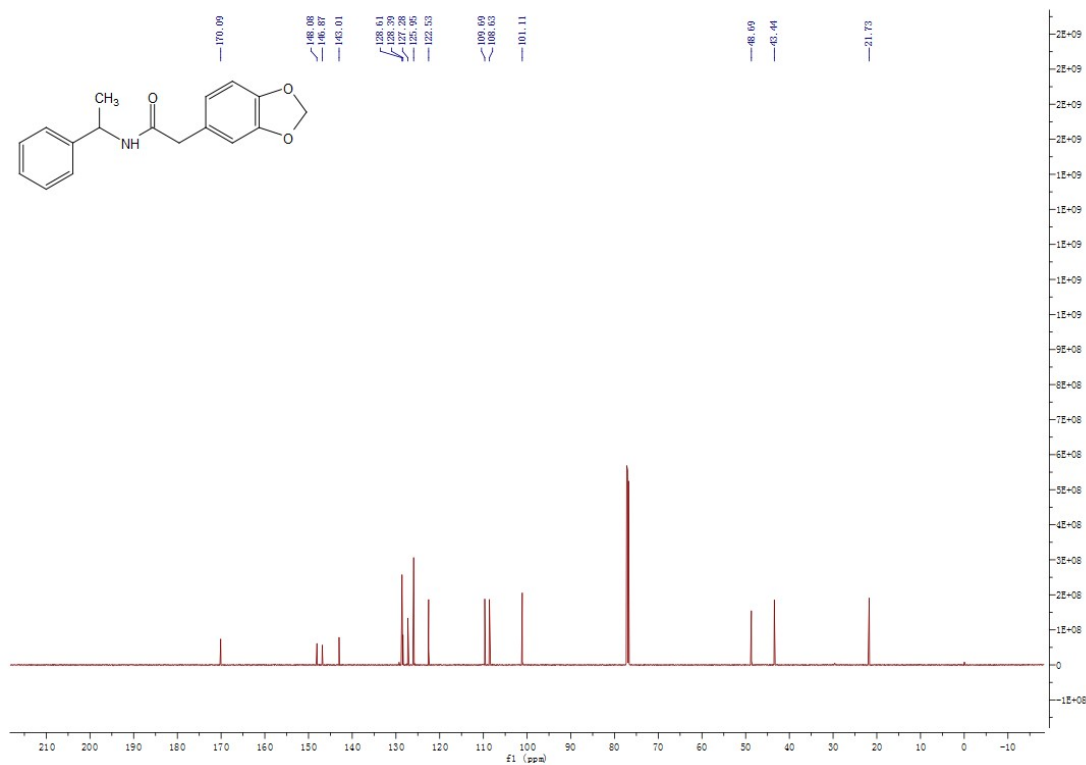

### <sup>1</sup>H NMR of N-(4-chlorophenyl)-2-phenylacetamide (3x)

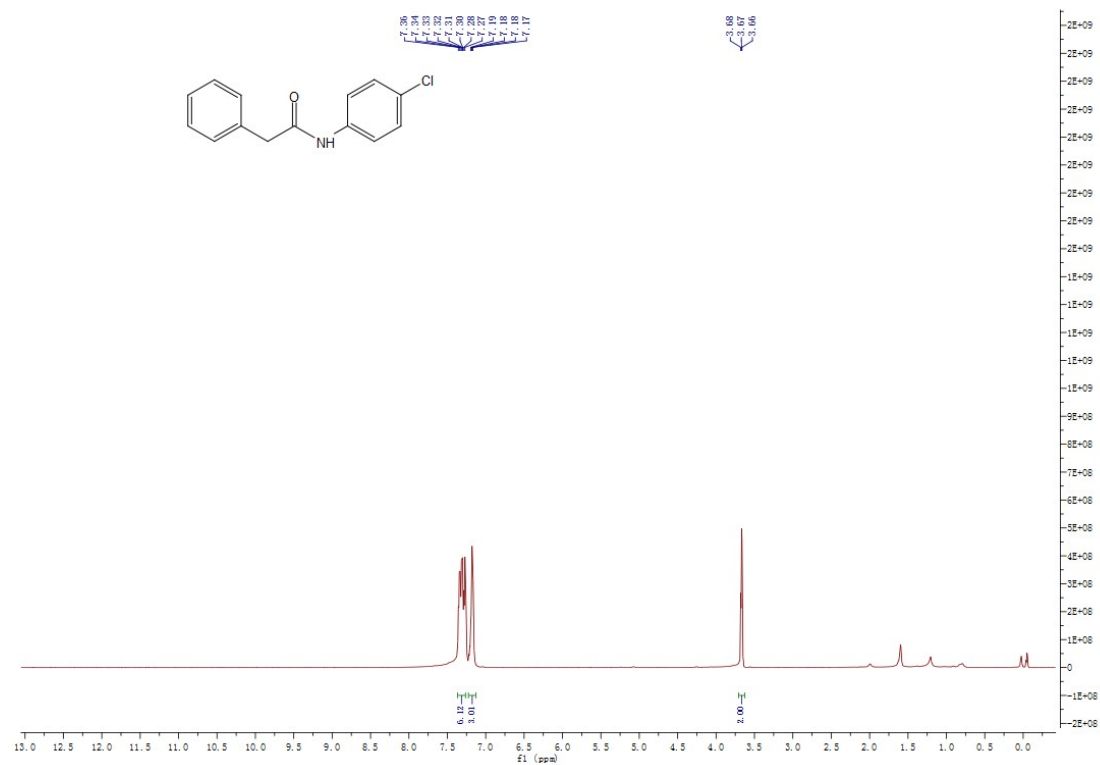

### <sup>13</sup>C NMR of N-(4-chlorophenyl)-2-phenylacetamide (3x)

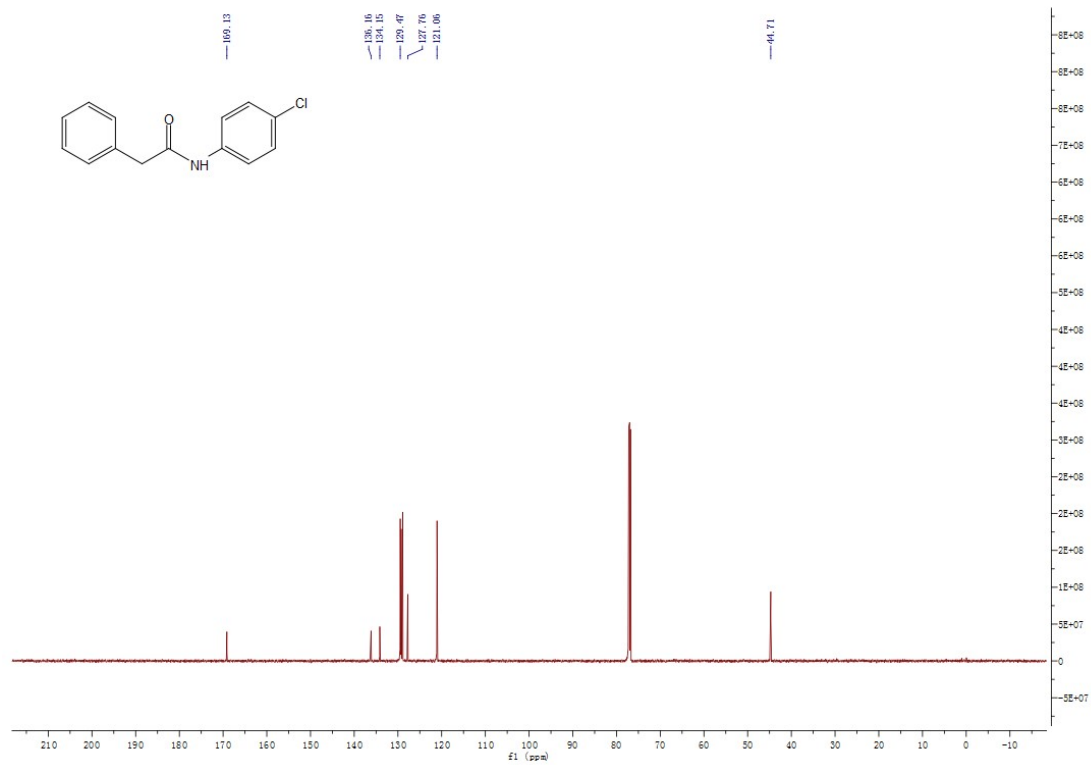



### $^1\text{H}$ NMR of N-methylbenzamide (3aa)

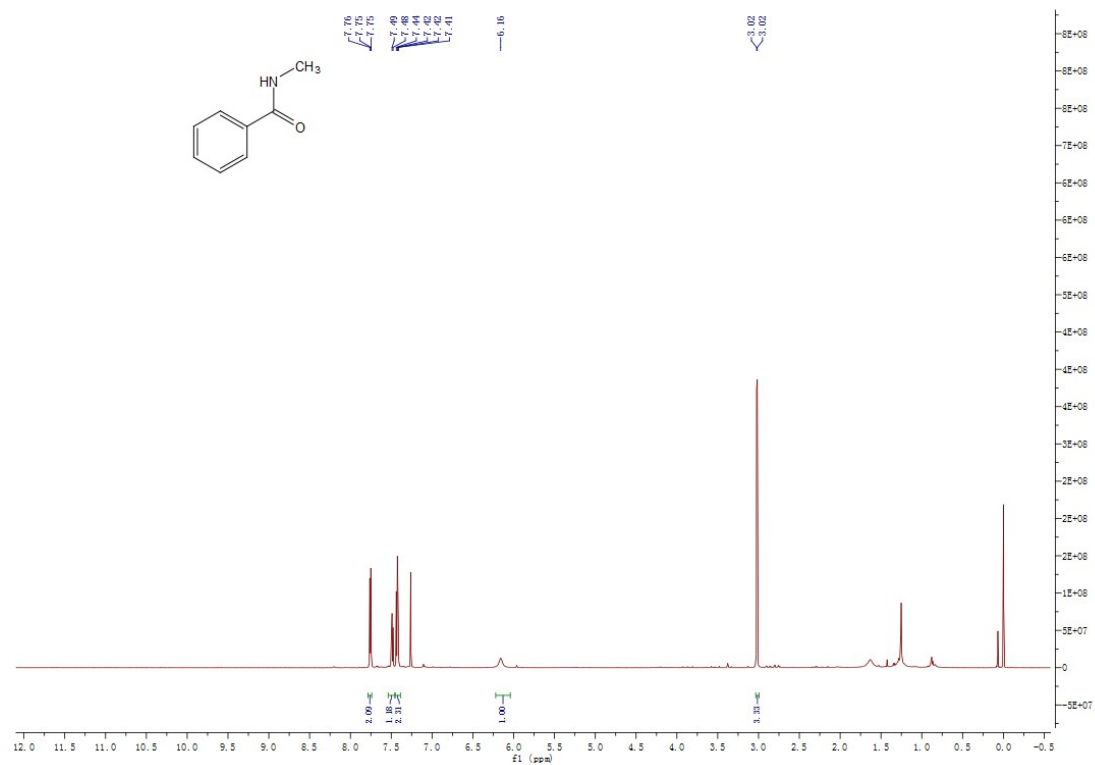

### $^{13}\text{C}$ NMR of N-methylbenzamide (3aa)

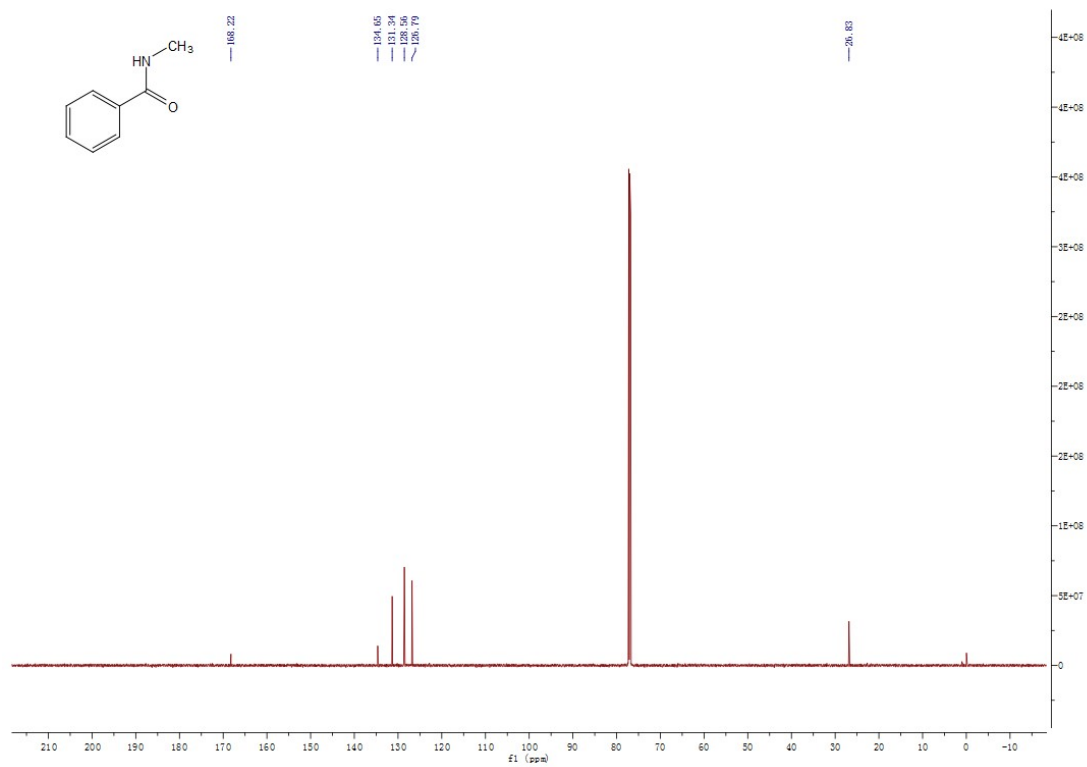

### <sup>1</sup>H NMR of 4-bromo-N-methylbenzamide (3ab)

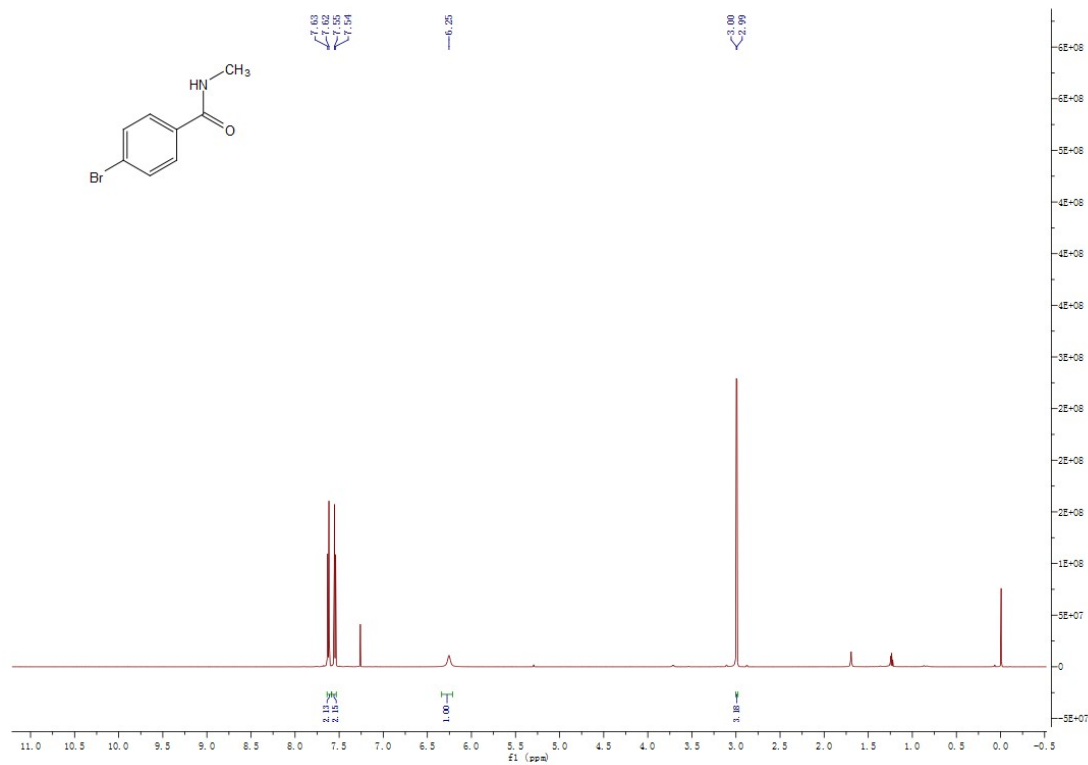

### <sup>13</sup>C NMR of 4-bromo-N-methylbenzamide (3ab)

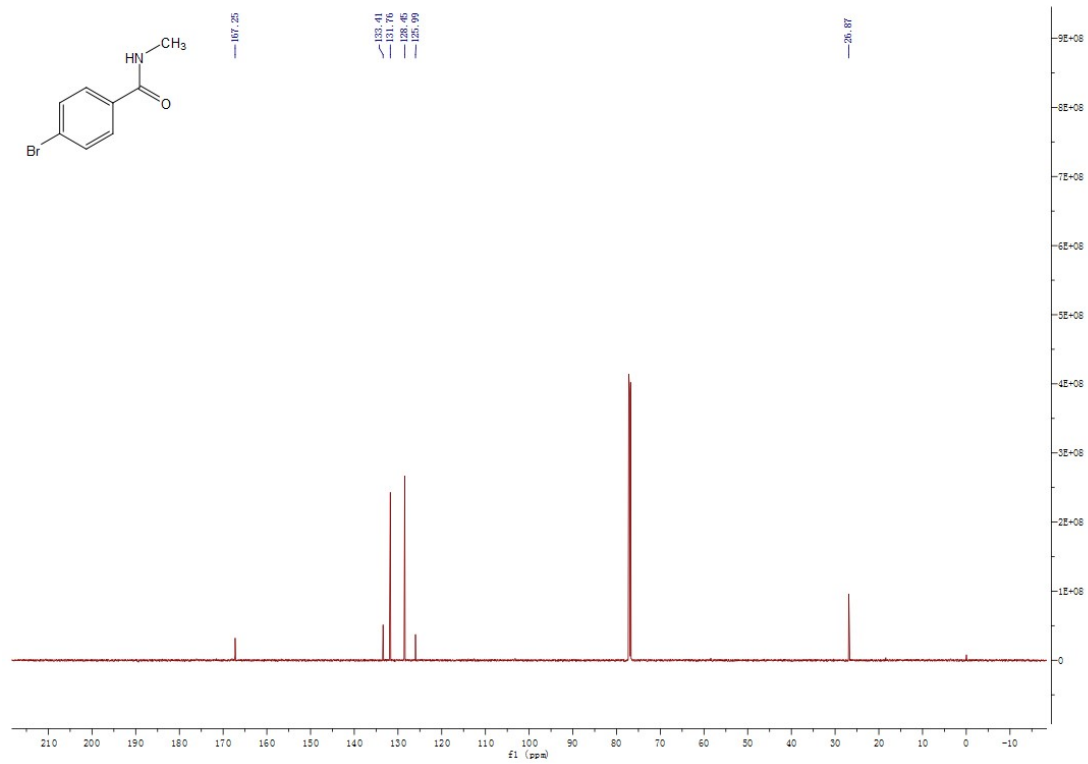



### <sup>1</sup>H NMR of 4-fluoro-N-methylbenzamide (3ac)

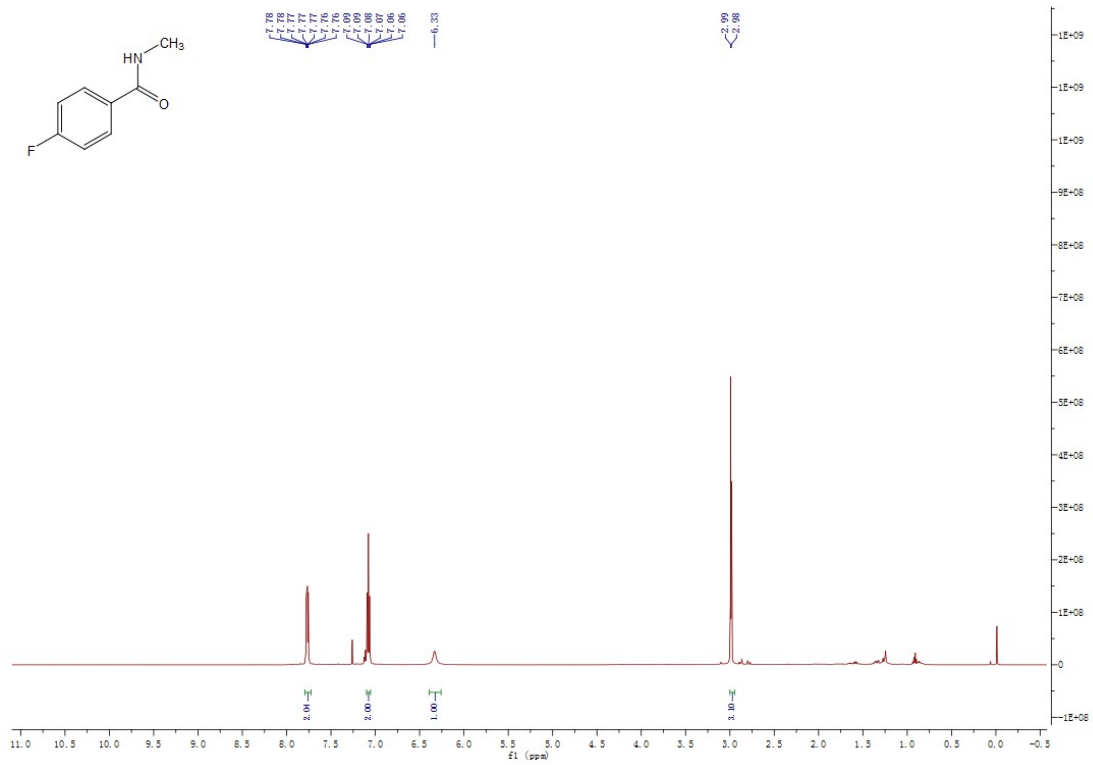

### <sup>13</sup>C NMR of 4-fluoro-N-methylbenzamide (3ac)

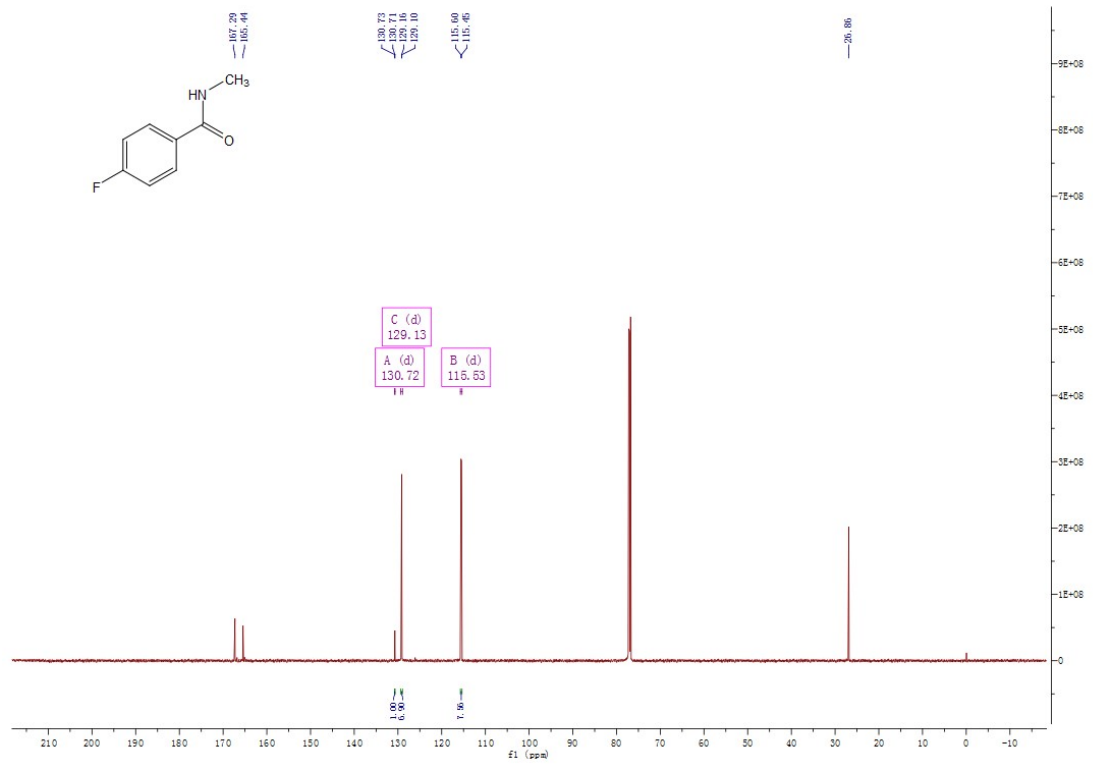

### <sup>1</sup>H NMR of N,4-dimethylbenzamide (3ad)

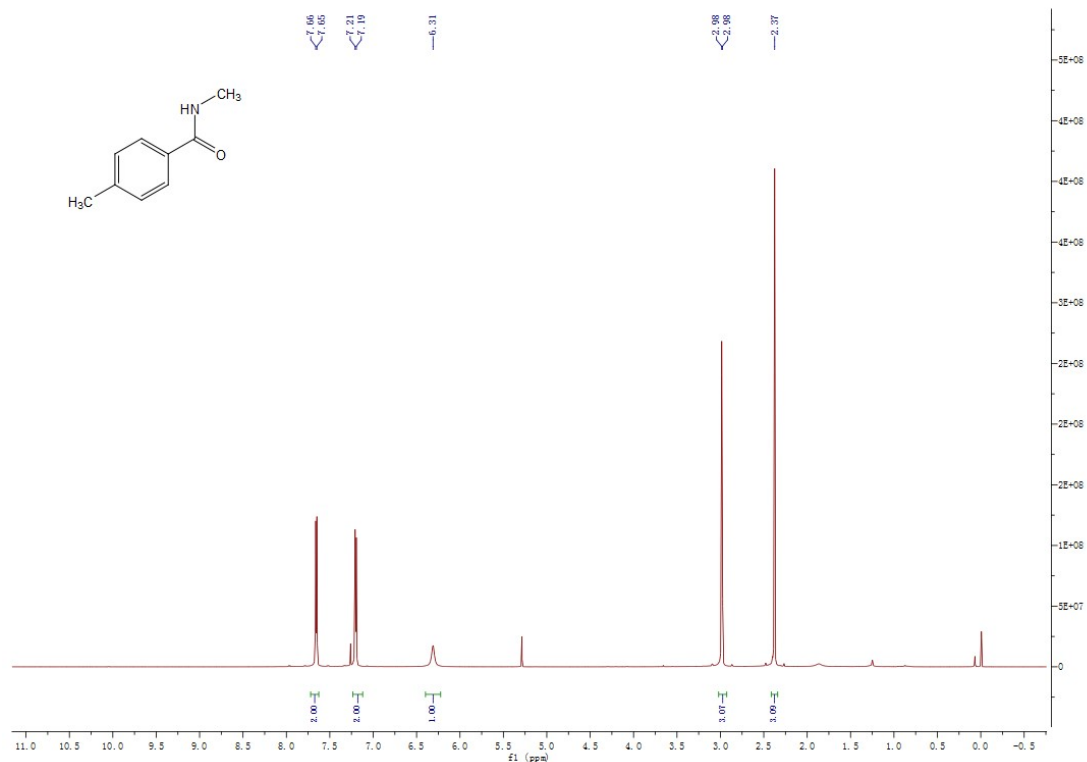

### <sup>13</sup>C NMR of N,4-dimethylbenzamide (3ad)

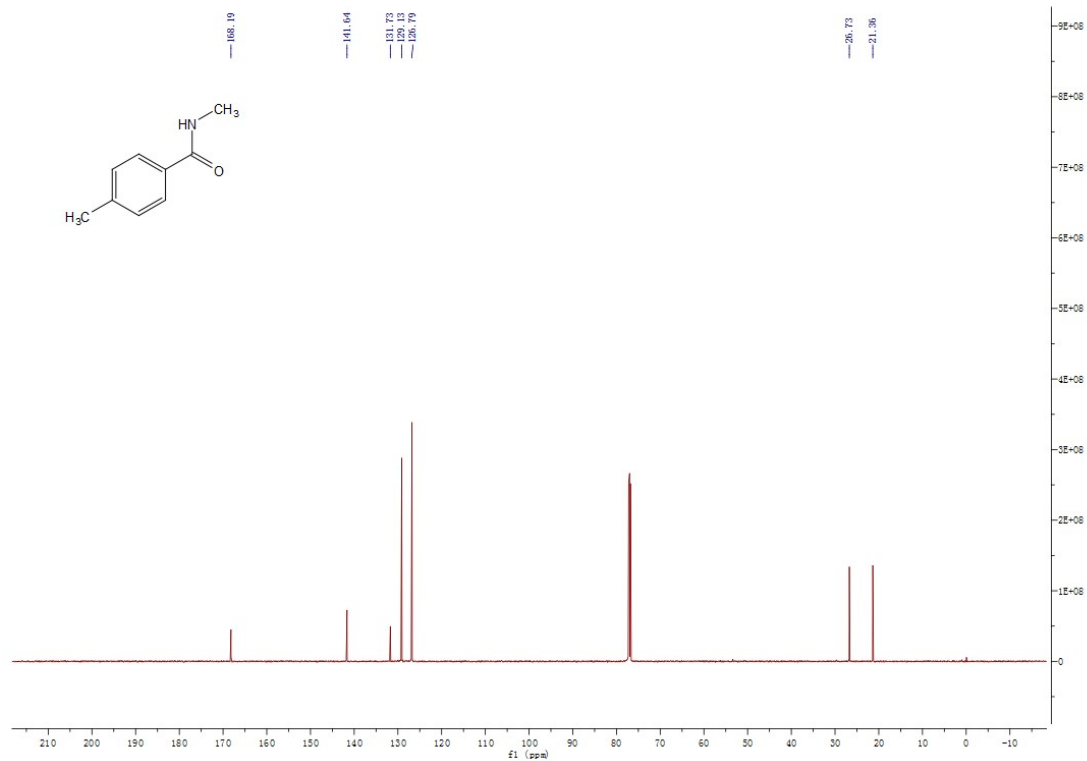

### <sup>1</sup>H NMR of 4-methoxy-N-methylbenzamide (3ae)

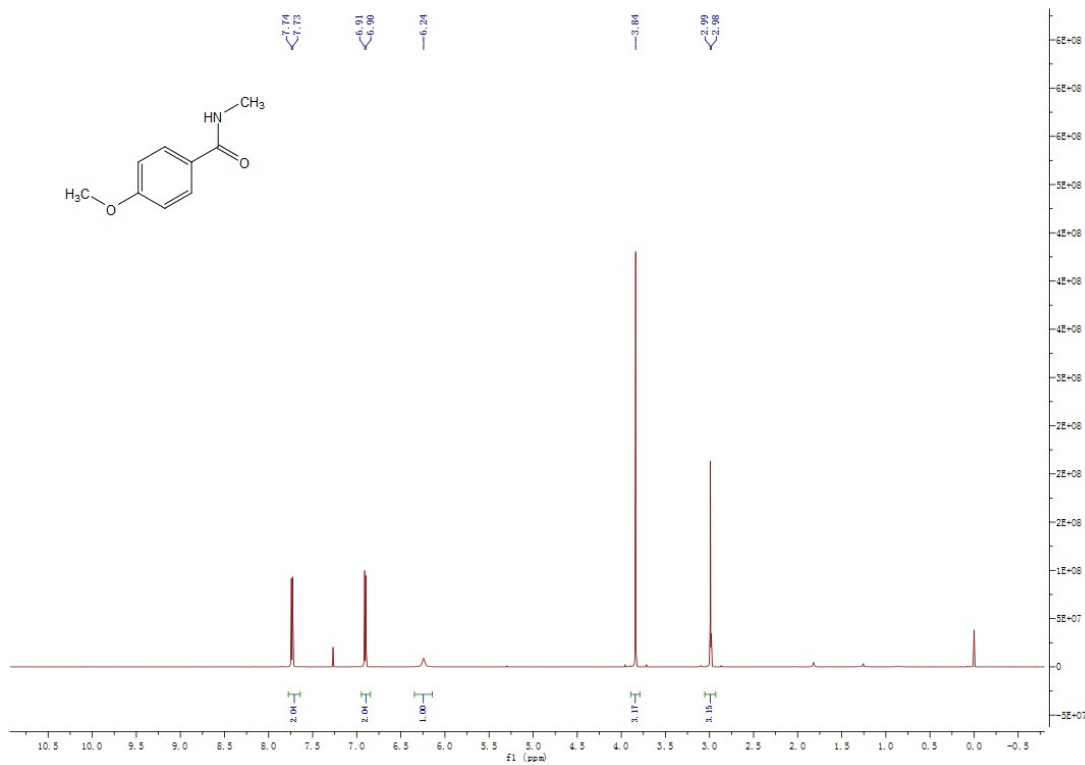

### <sup>13</sup>C NMR of 4-methoxy-N-methylbenzamide (3ae)

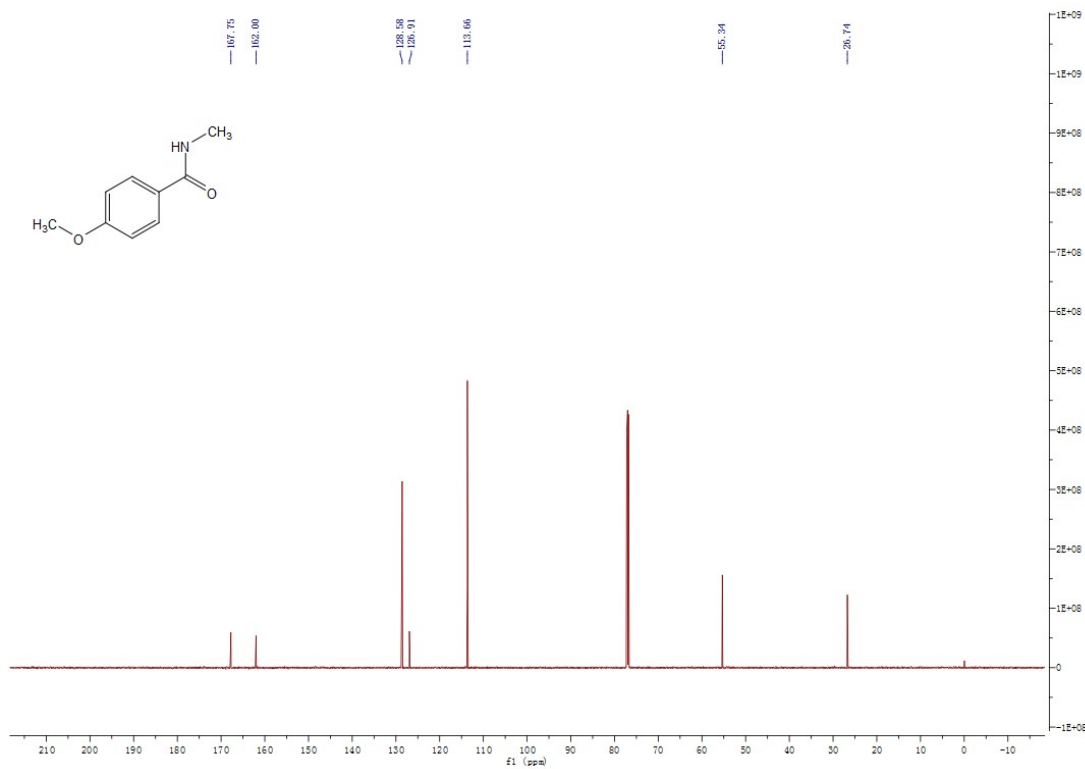

### $^1\text{H}$ NMR of N-methyl-4-nitrobenzamide (3af)

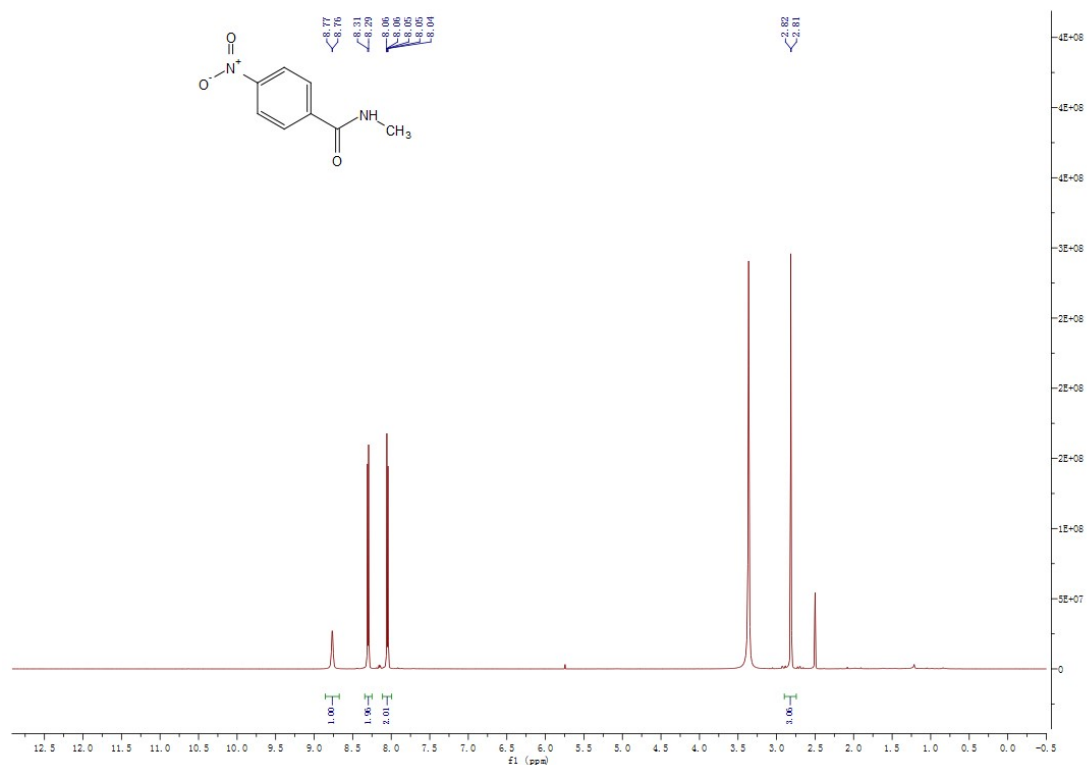

### $^{13}\text{C}$ NMR of N-methyl-4-nitrobenzamide (3af)

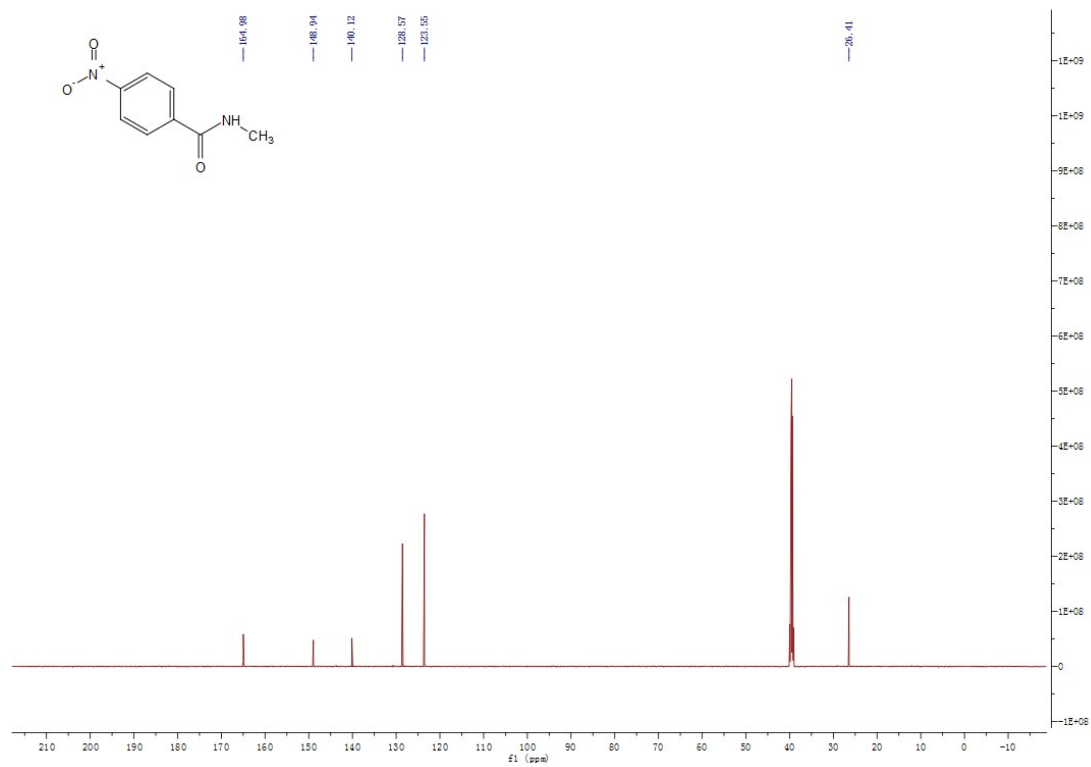

### $^1\text{H}$ NMR of N-methyl-4-(methylsulfonyl)benzamide (3ag)

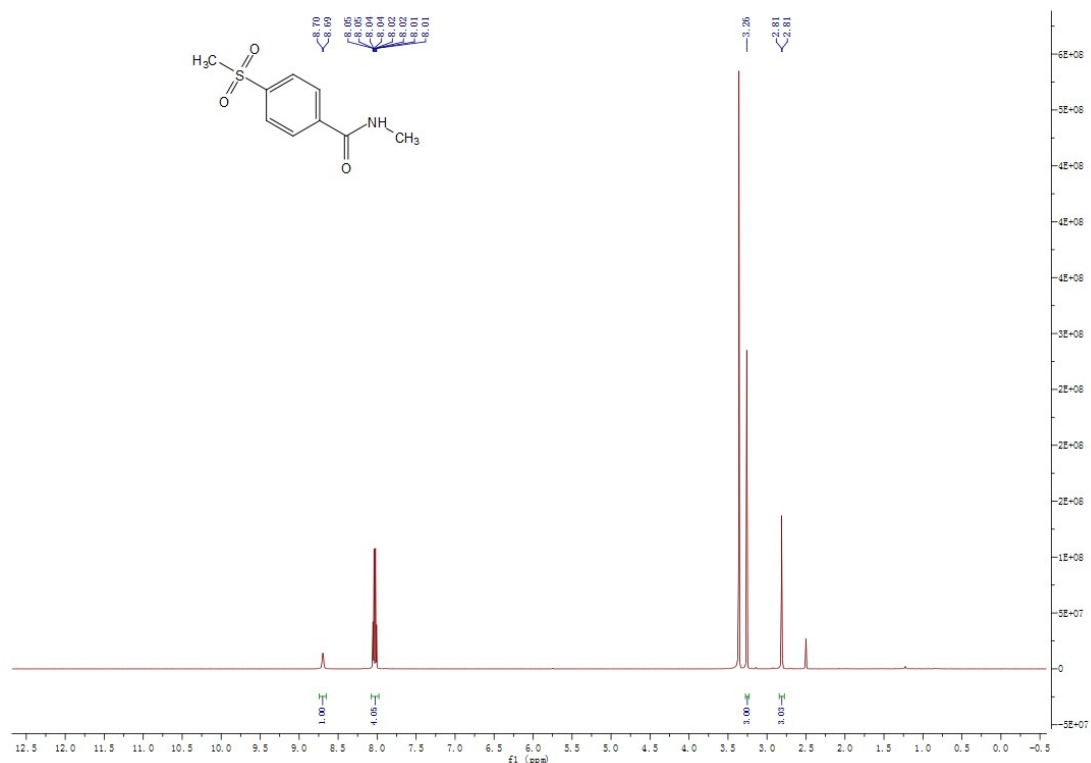

### $^{13}\text{C}$ NMR of N-methyl-4-(methylsulfonyl)benzamide (3ag)

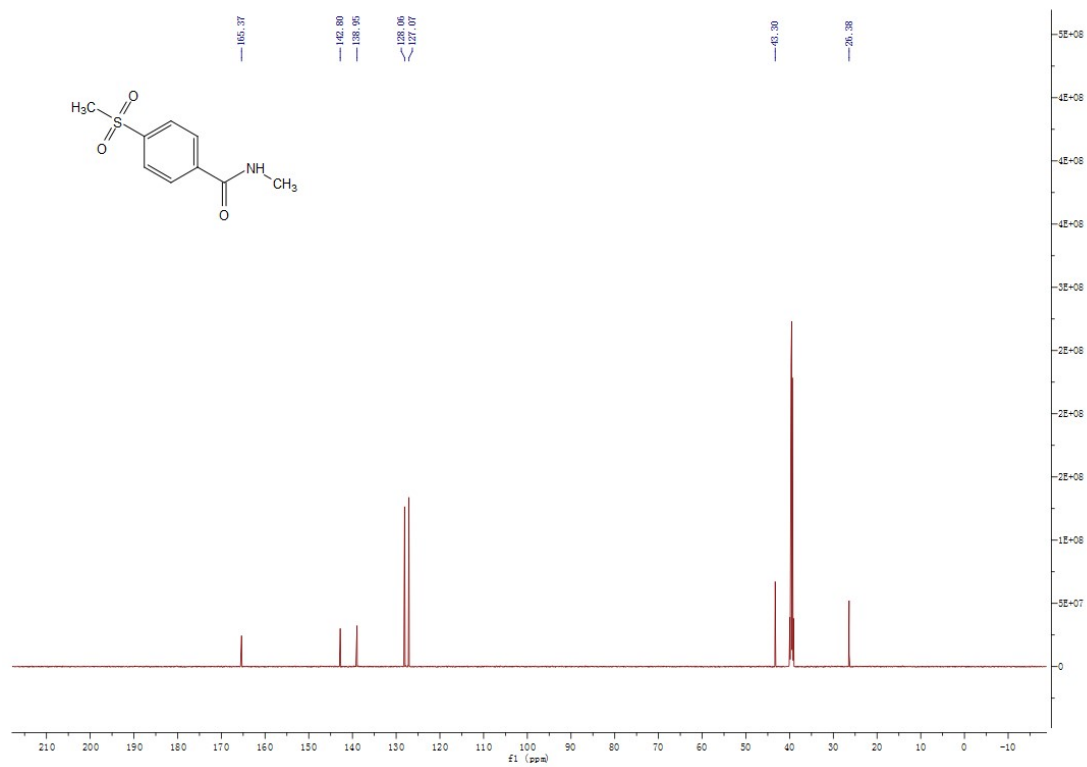

### <sup>1</sup>H NMR of N-methyl-3,5-dinitrobenzamide (3ah)

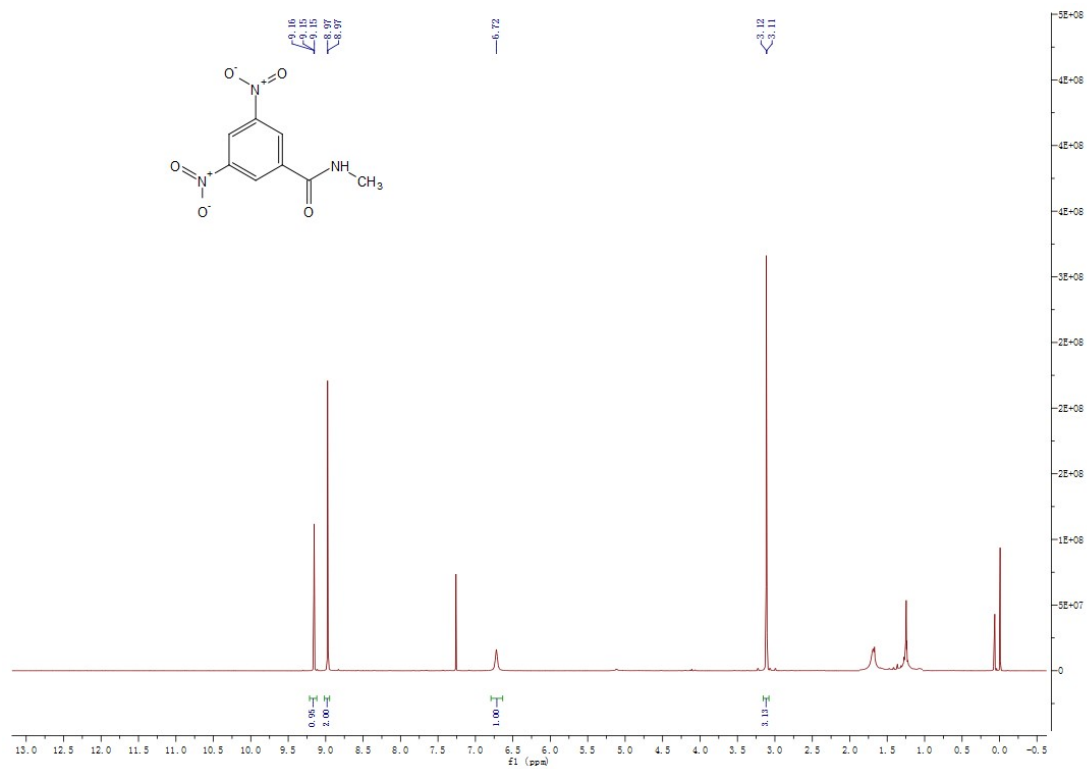

### <sup>13</sup>C NMR of N-methyl-3,5-dinitrobenzamide (3ah)

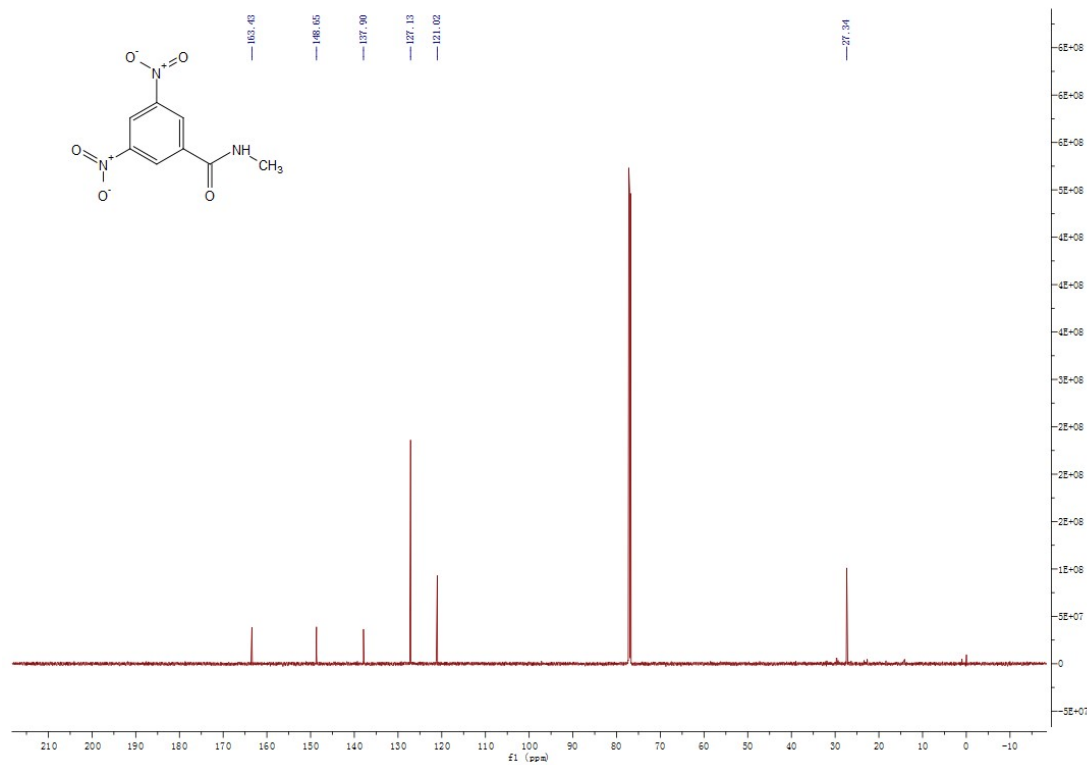

### <sup>1</sup>H NMR of 4-cyano-N-methylbenzamide (3ai)

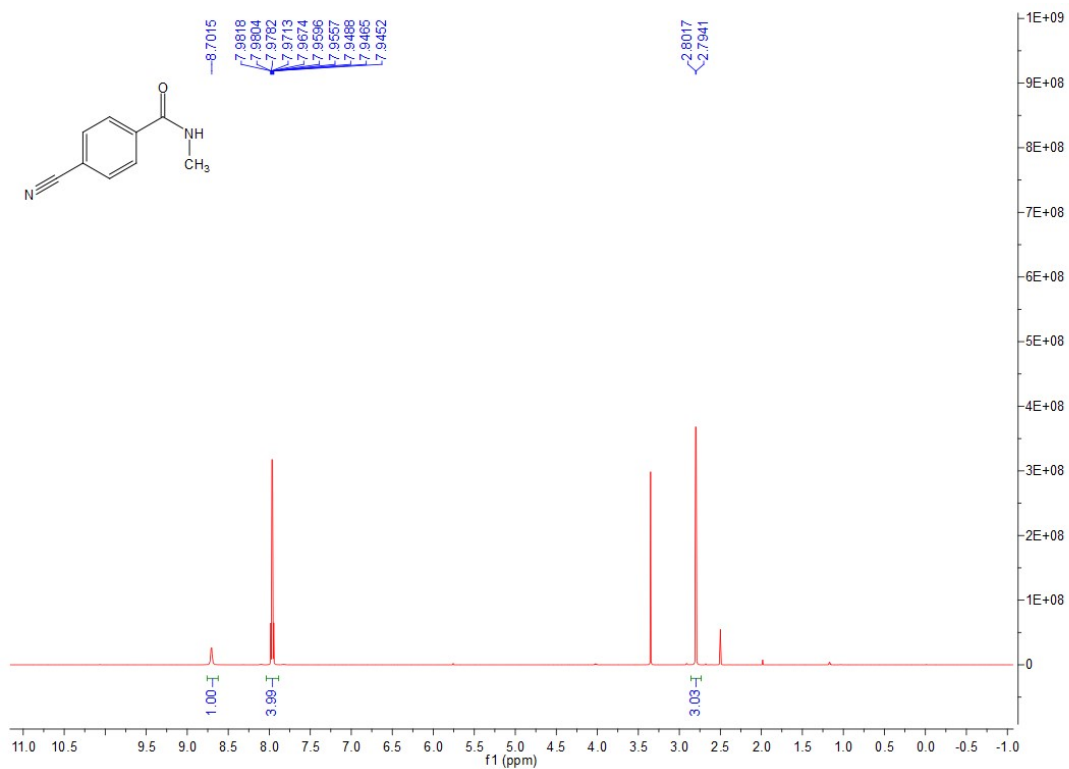

### <sup>13</sup>C NMR of 4-cyano-N-methylbenzamide (3ai)

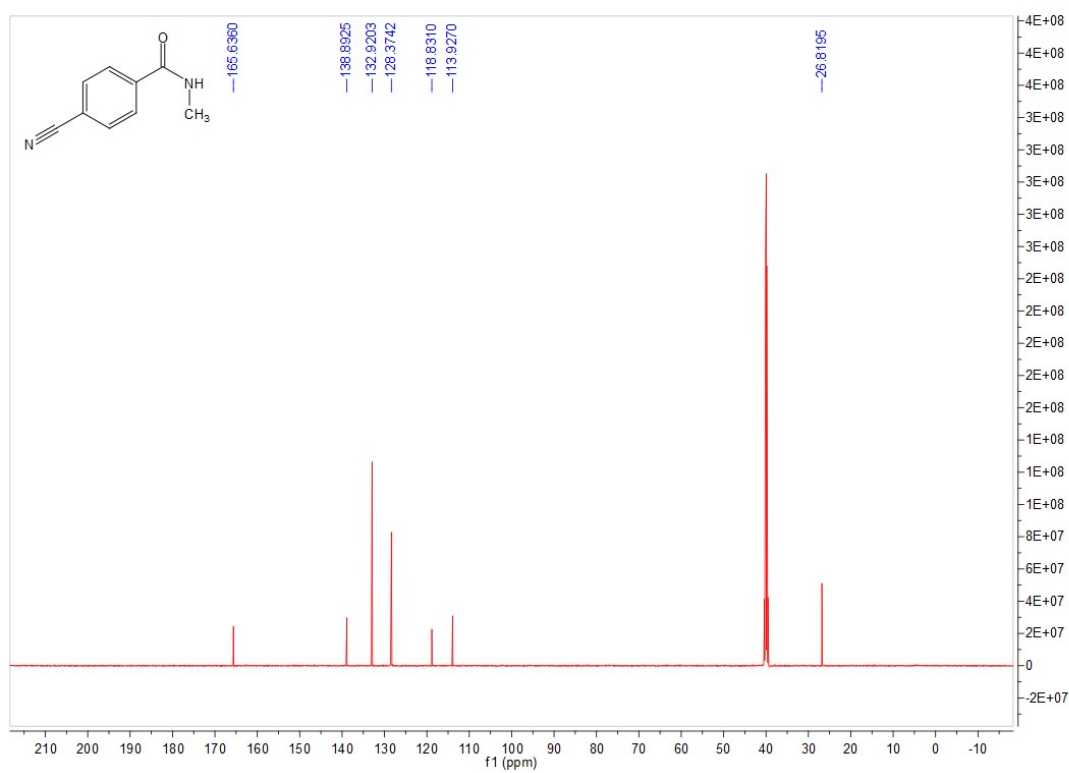

### <sup>1</sup>H NMR of 4-bromo-2-fluoro-N-methylbenzamide:: (3aj)

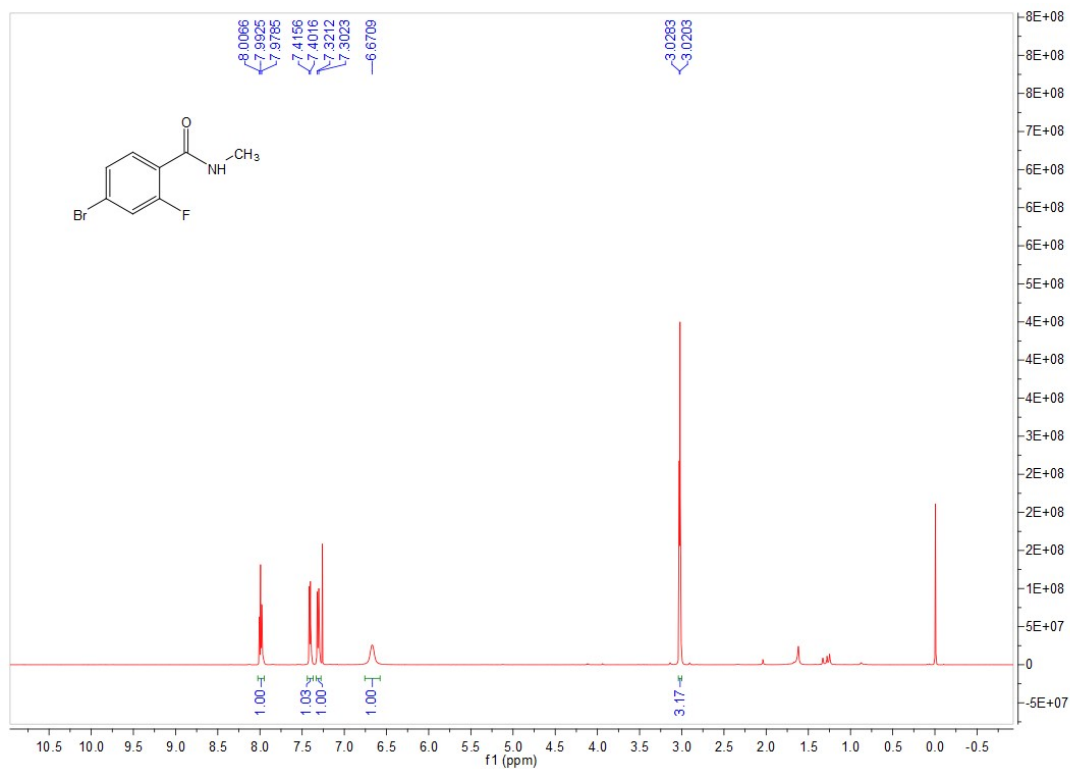

### <sup>13</sup>C NMR of 4-bromo-2-fluoro-N-methylbenzamide:: (3aj)

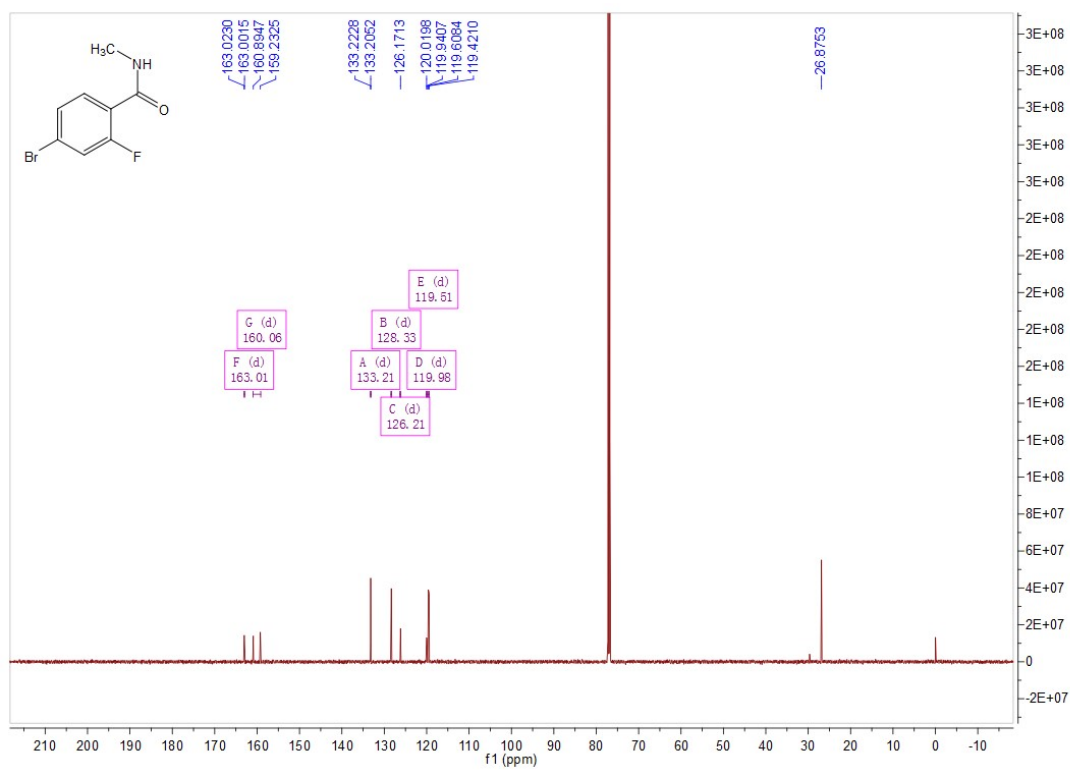



**<sup>1</sup>H NMR of 3-methyl-2-thioxo-2H-benzo[e][1,3]thiazin-4(3H)-one (3ak)**

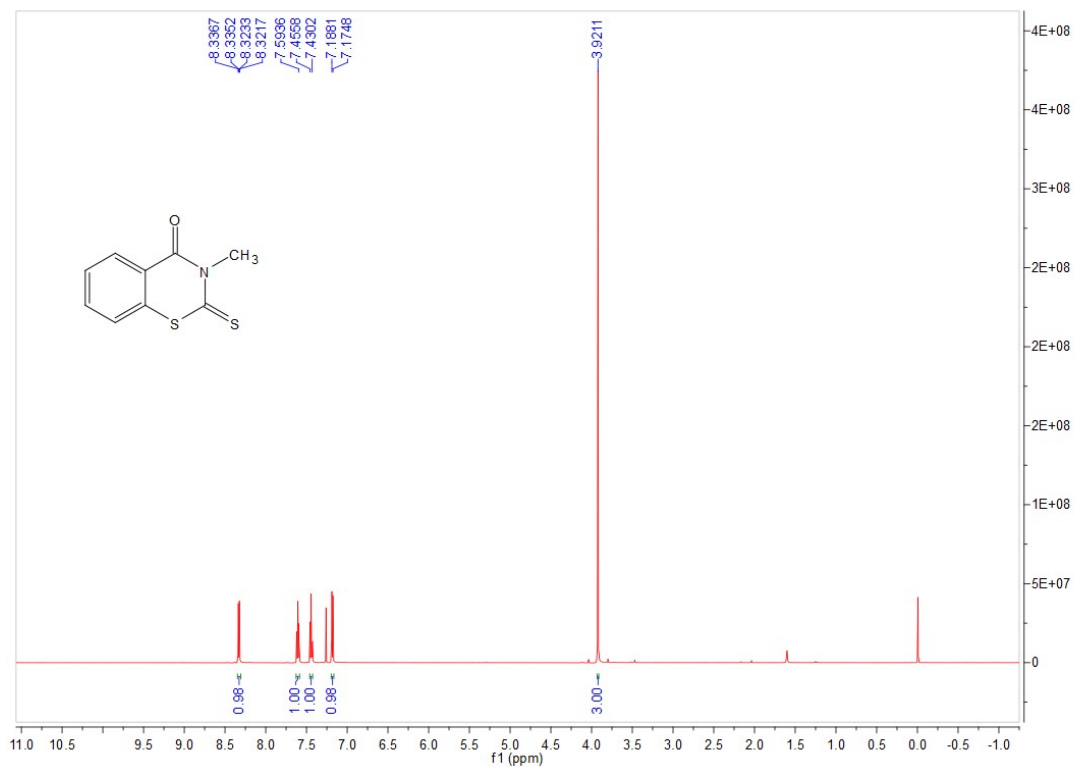

**<sup>13</sup>C NMR of 3-methyl-2-thioxo-2H-benzo[e][1,3]thiazin-4(3H)-one (3ak)**

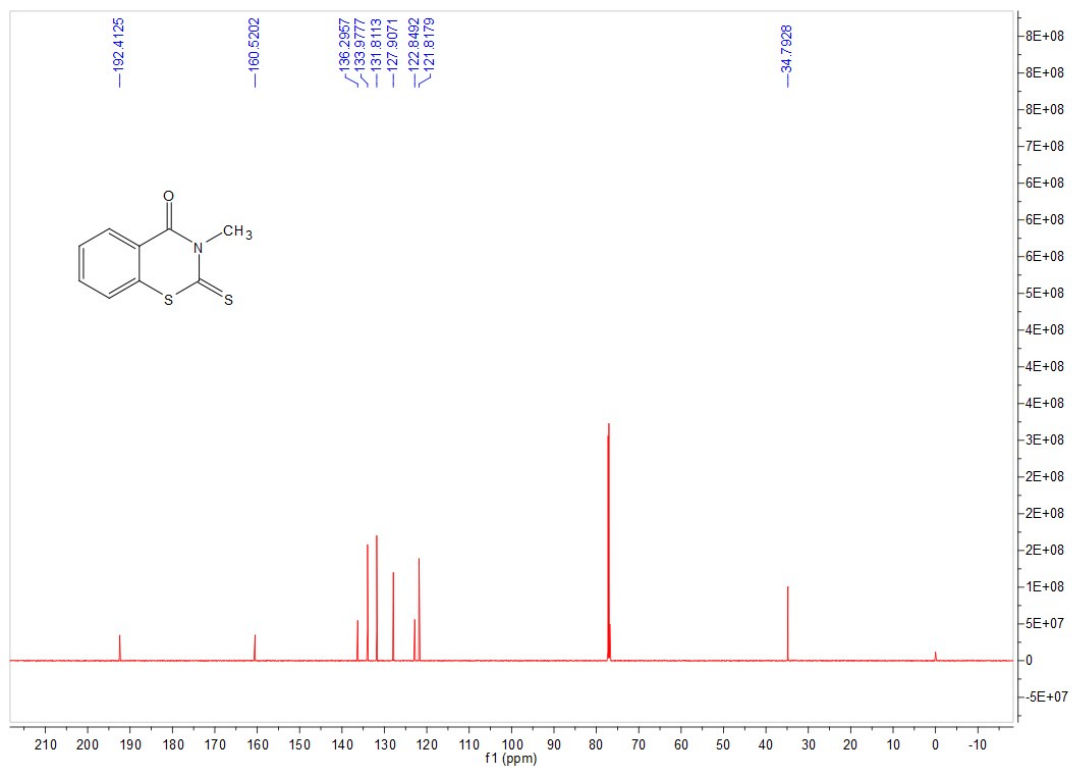

### <sup>1</sup>H NMR of 2-bromo-N,4-dimethylbenzamide (3a)

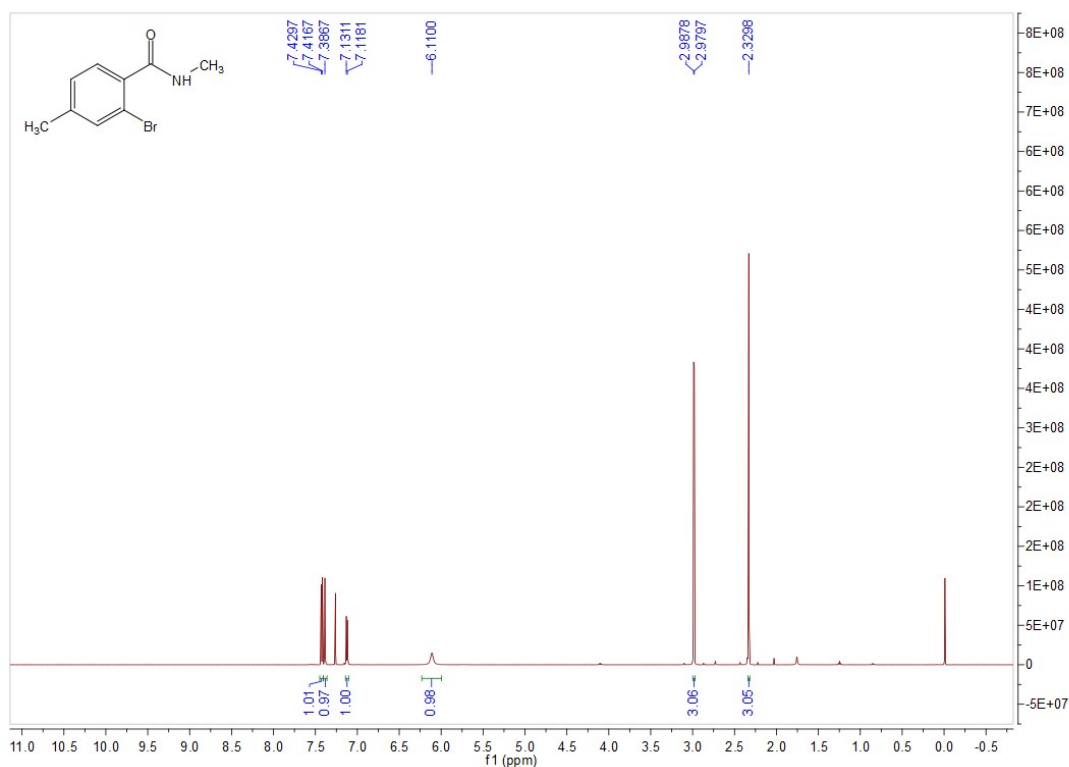

### <sup>13</sup>C NMR of 2-bromo-N,4-dimethylbenzamide (3a)

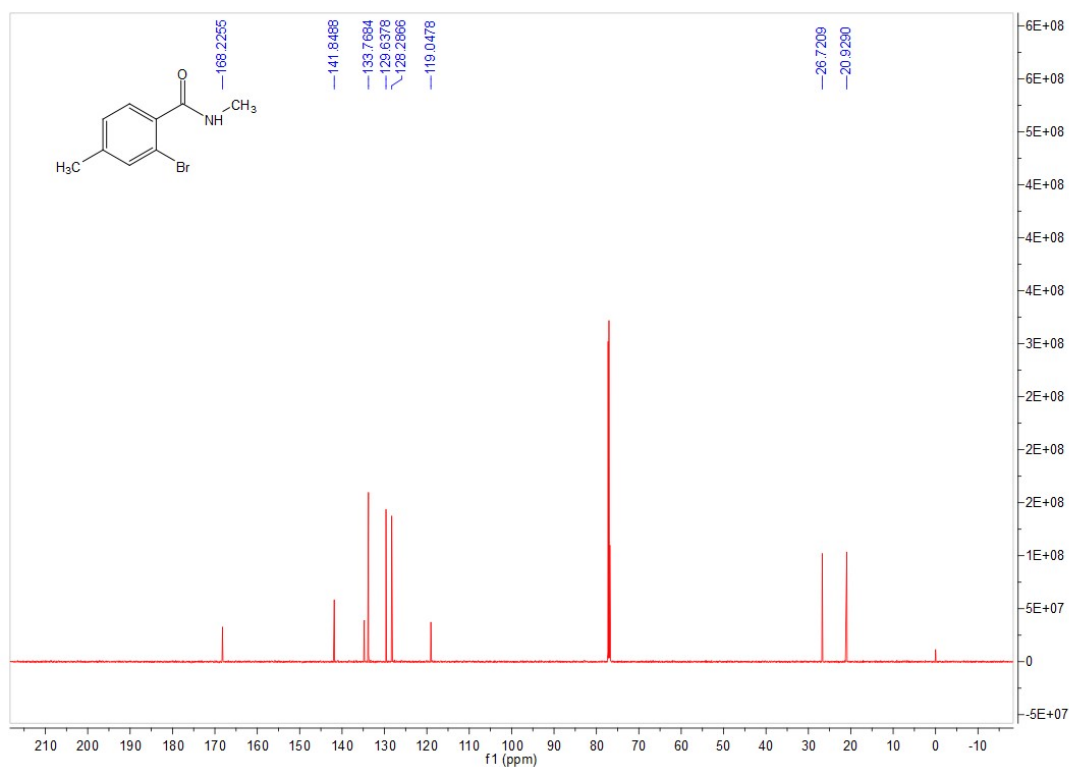

### <sup>1</sup>H NMR of 2-bromo-5-fluoro-N-methylbenzamide (3am)

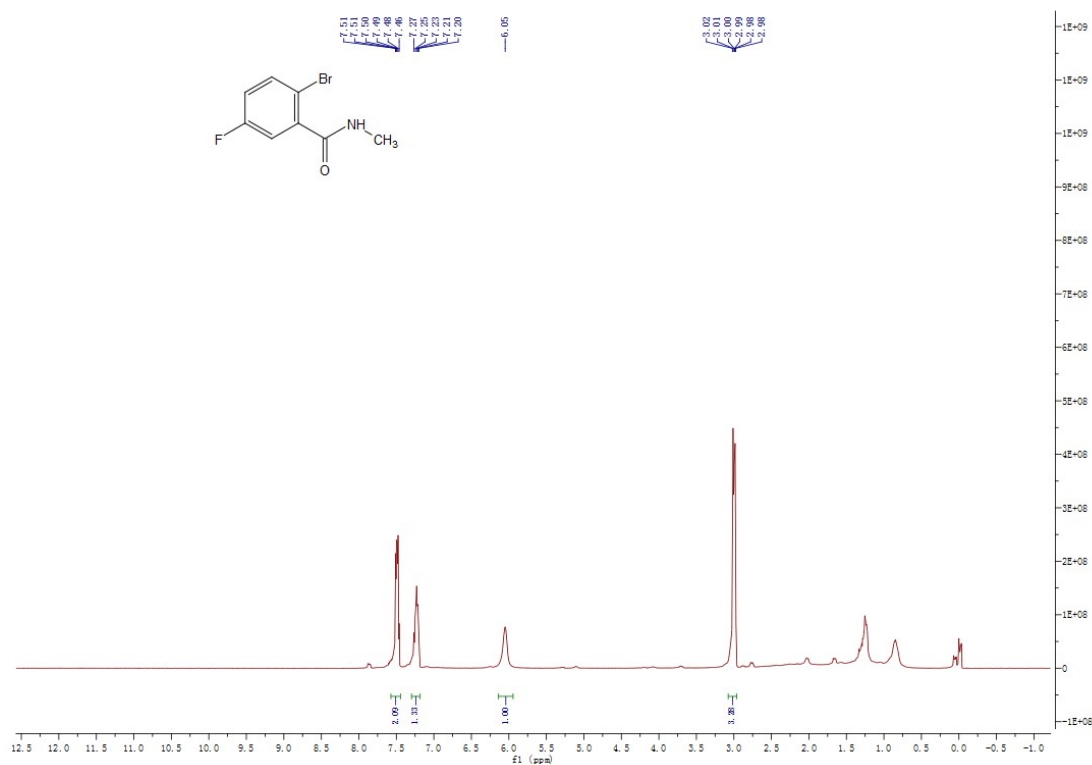

### <sup>13</sup>C NMR of 2-bromo-5-fluoro-N-methylbenzamide (3am)

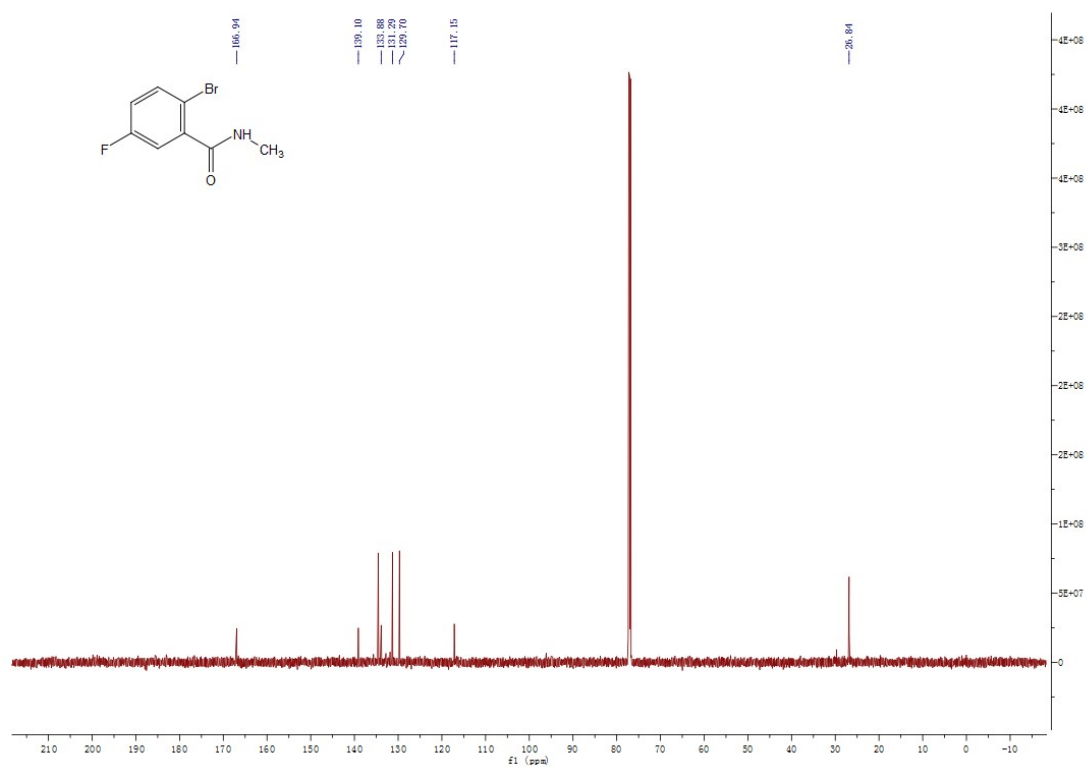

### <sup>1</sup>H NMR of 2-bromo-N,3-dimethylbenzamide (3an)

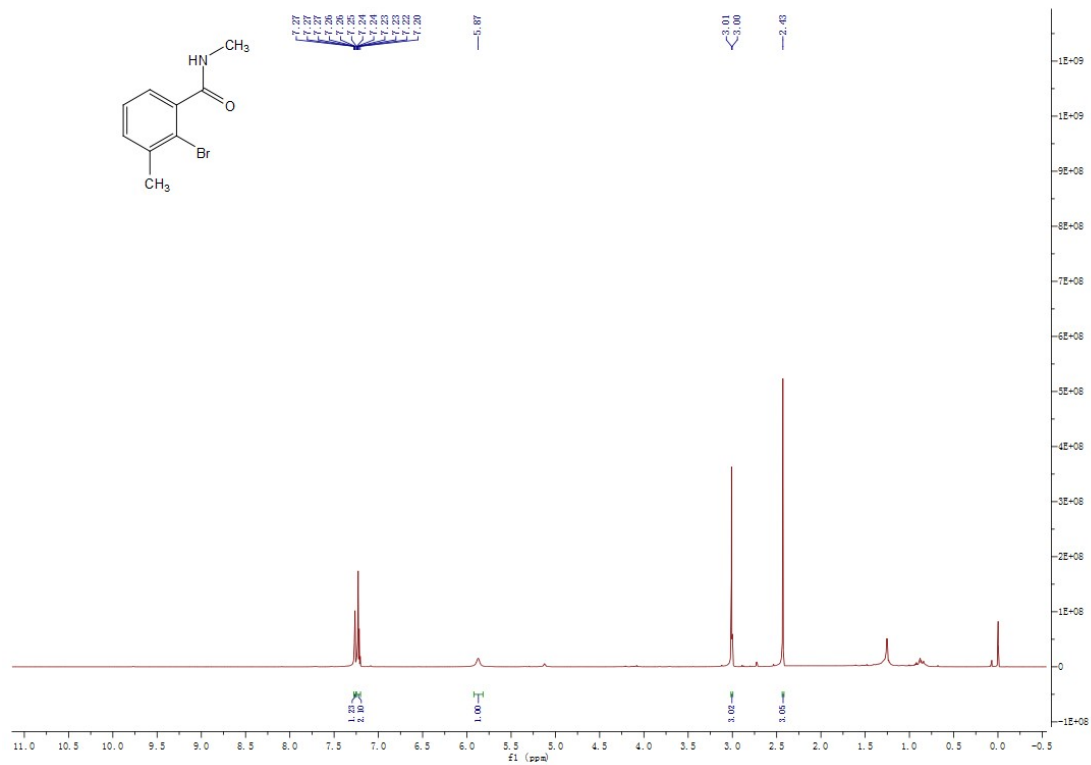

**<sup>13</sup>C NMR of 2-bromo-N,3-dimethylbenzamide (3an)**

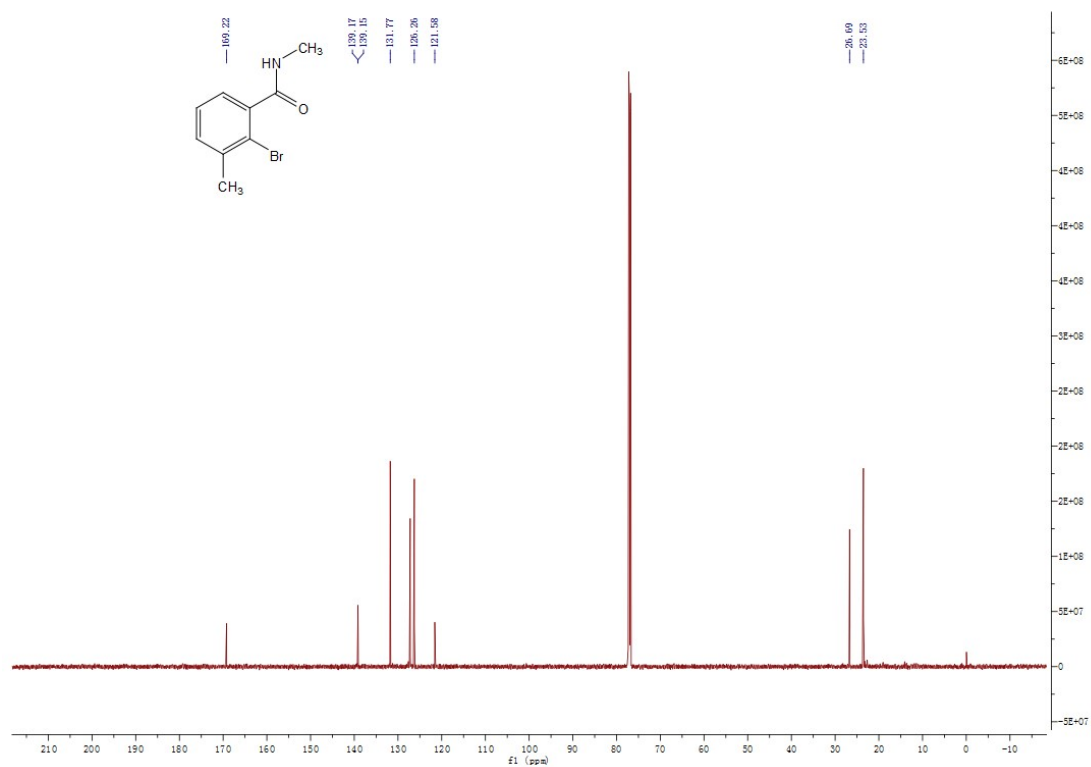

**<sup>1</sup>H NMR of N-methylthiophene-2-carboxamide (3ao)**

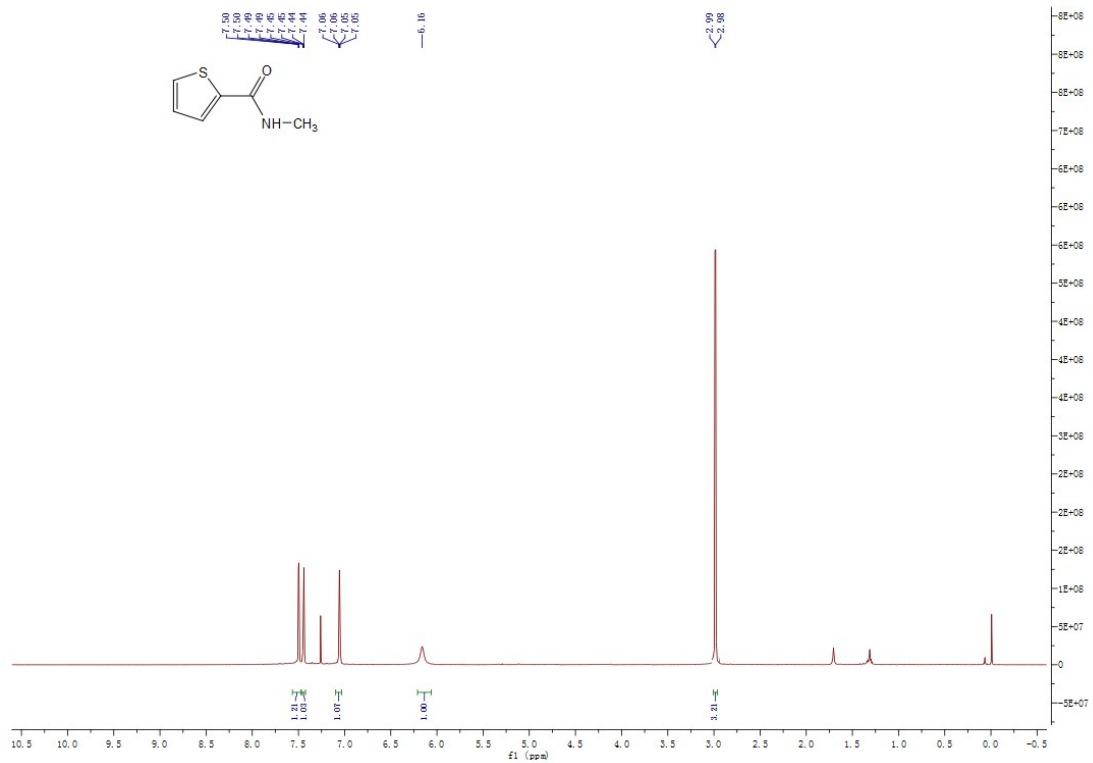

### <sup>13</sup>C NMR of N-methylthiophene-2-carboxamide (3ao)

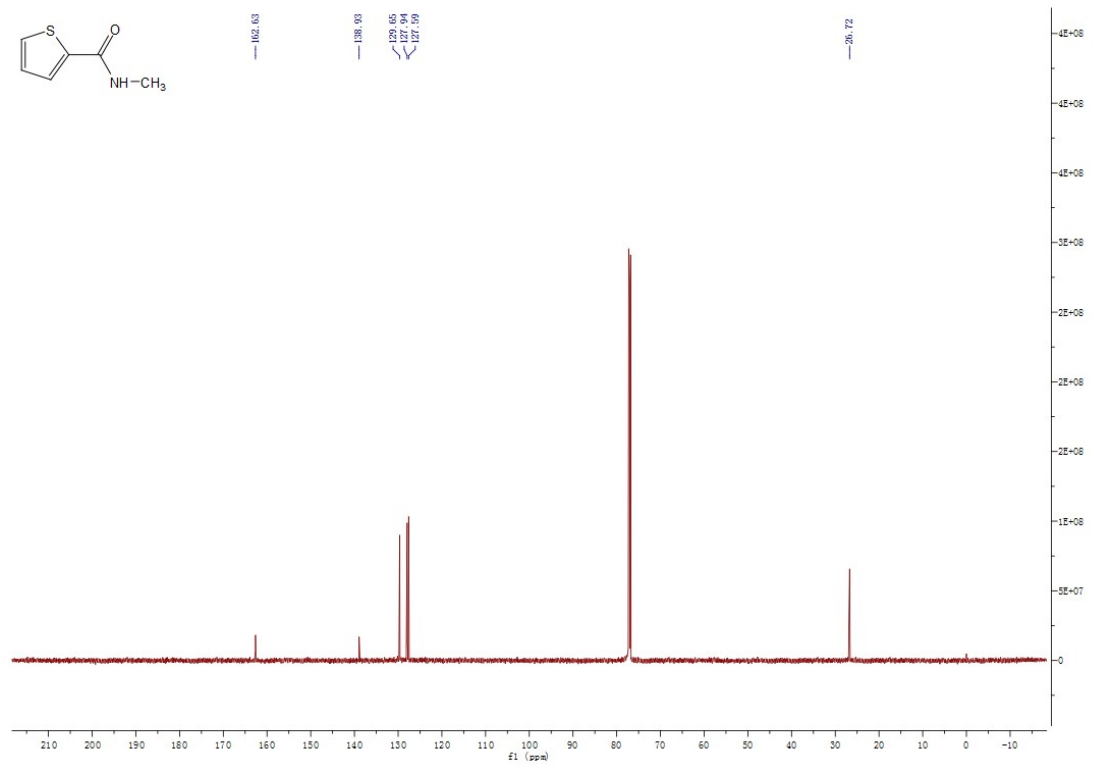

### <sup>1</sup>H NMR of N,5-dimethyloxazole-4-carboxamide (3ap)

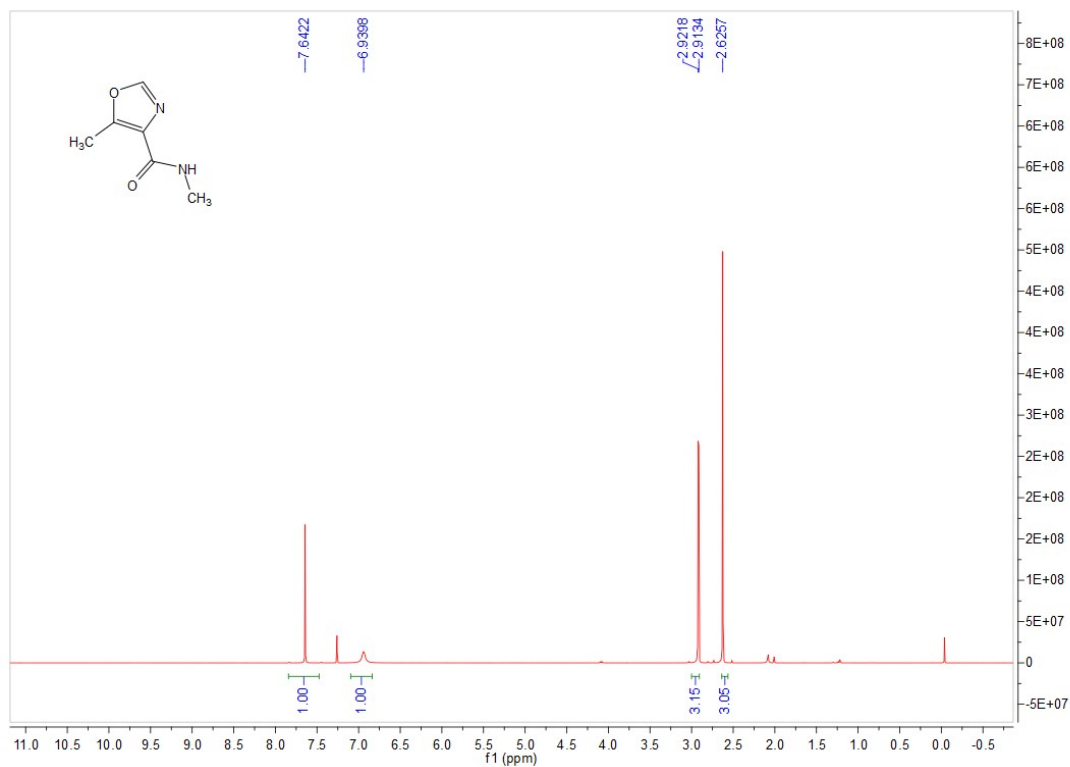

### <sup>13</sup>C NMR of N,5-dimethyloxazole-4-carboxamide (3ap)

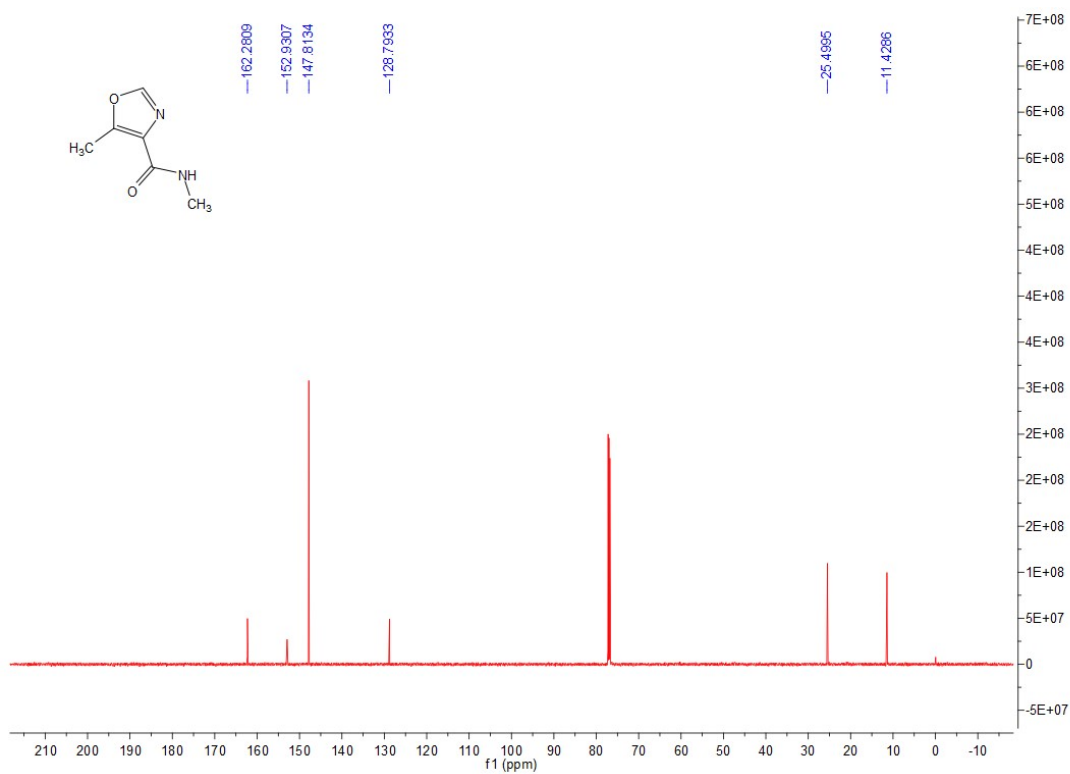

### <sup>1</sup>H NMR of N-methylisonicotinamide (3aq)

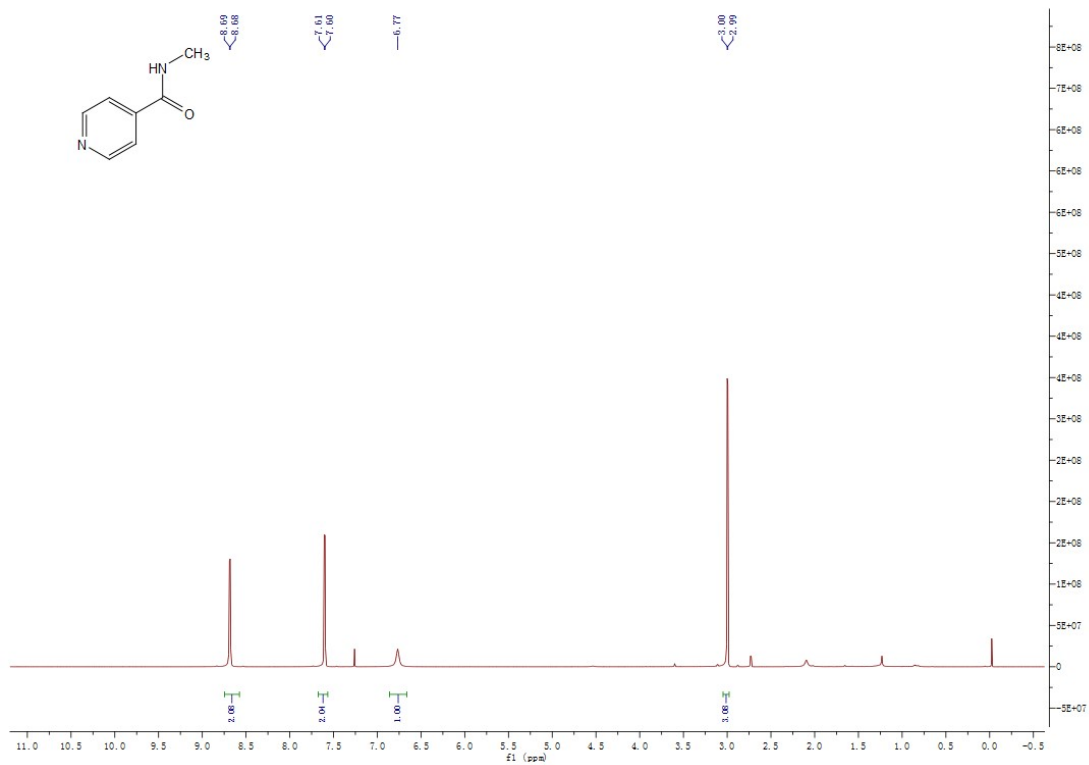

### <sup>13</sup>C NMR of N-methylisonicotinamide (3aq)

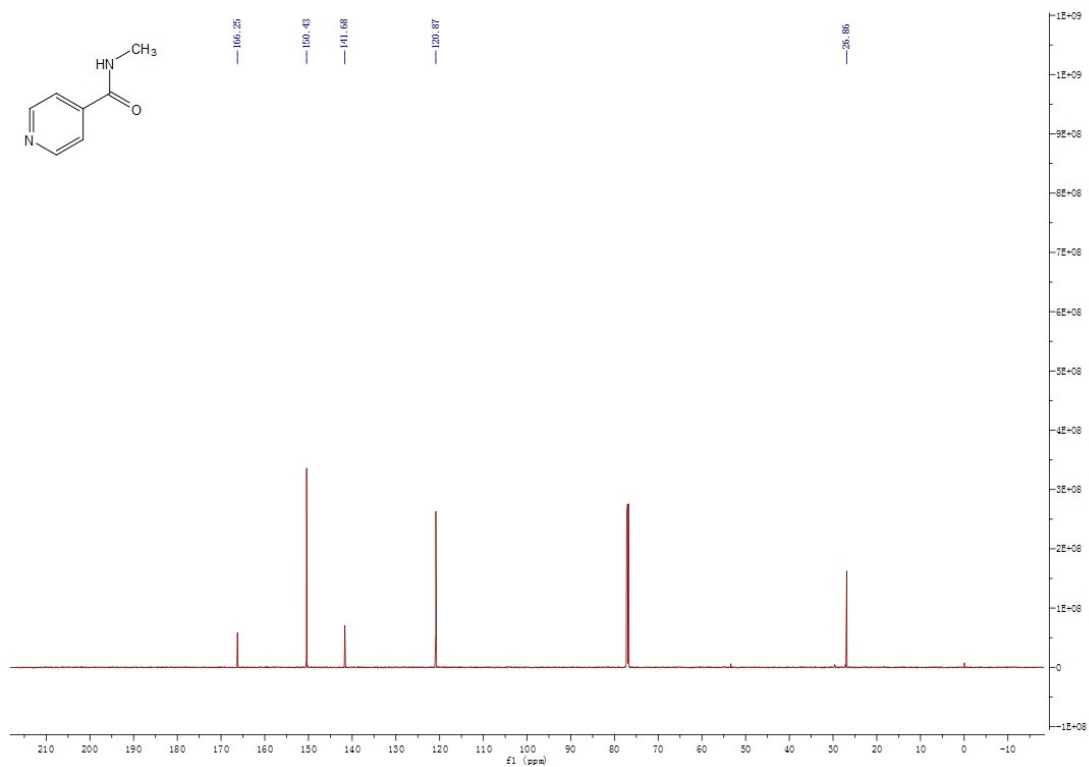

### <sup>1</sup>H NMR of 5-bromo-N-methylnicotinamide (3ar)

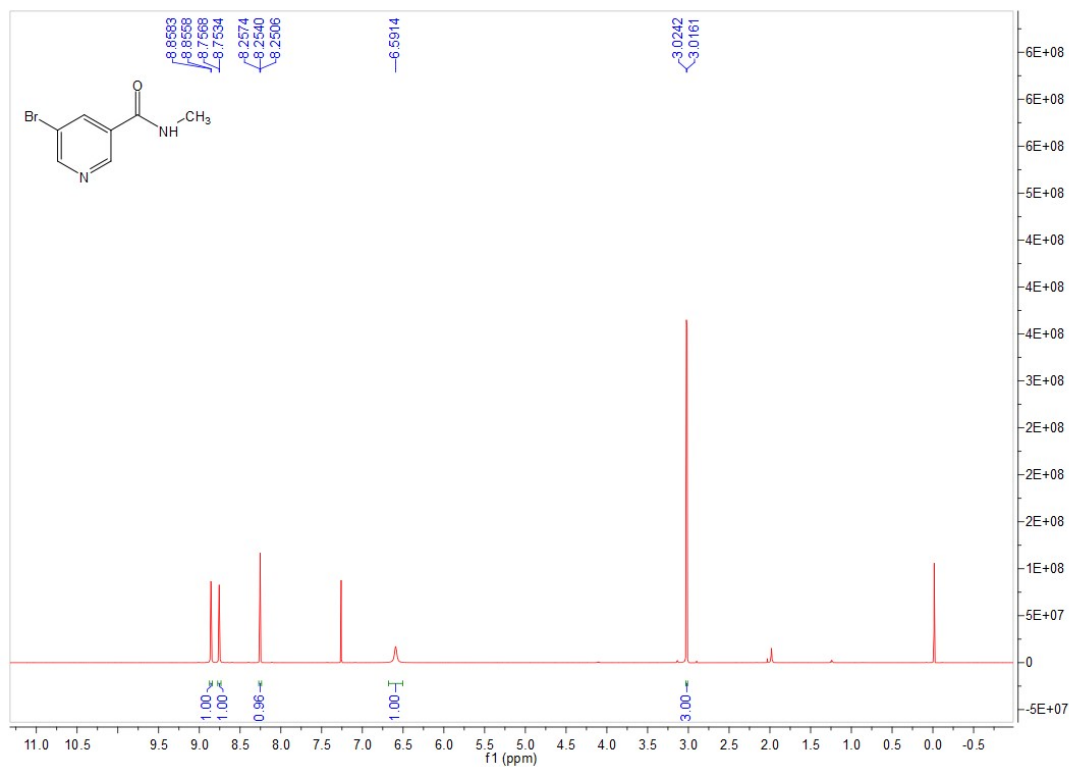

### <sup>13</sup>C NMR of 5-bromo-N-methylnicotinamide (3ar)

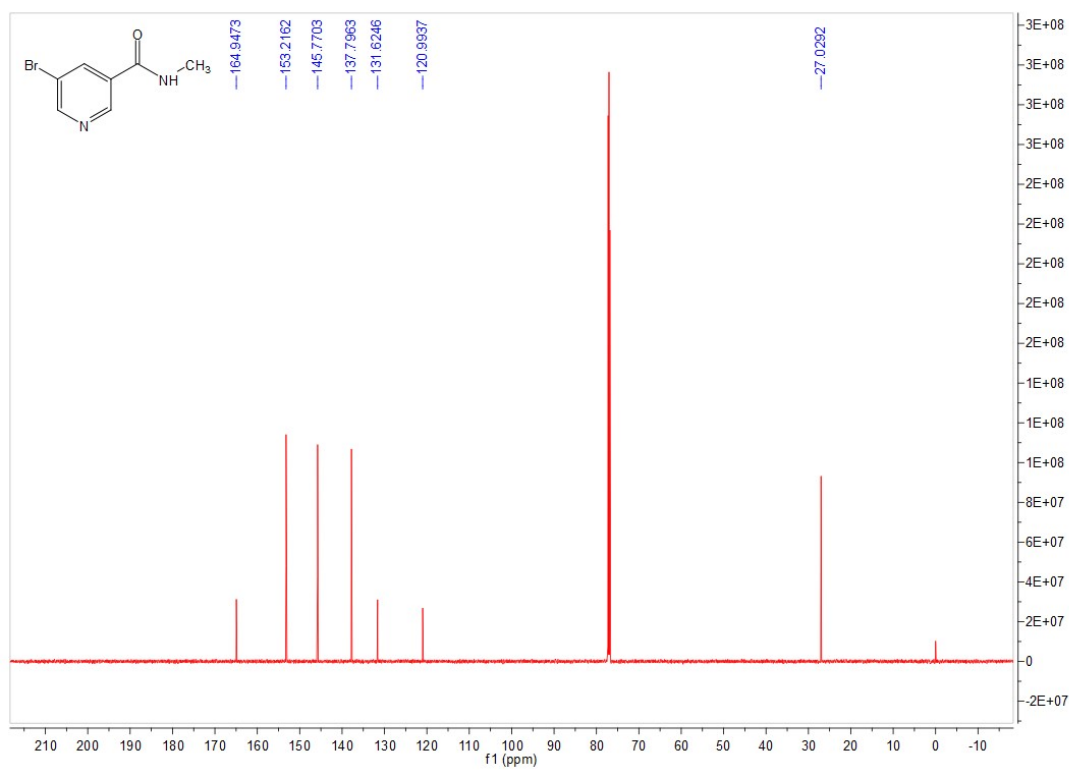



### <sup>1</sup>H NMR of N-methyl-4-(5-(trifluoromethyl)-1,2,4-oxadiazol-3-yl)benzamide (3as)

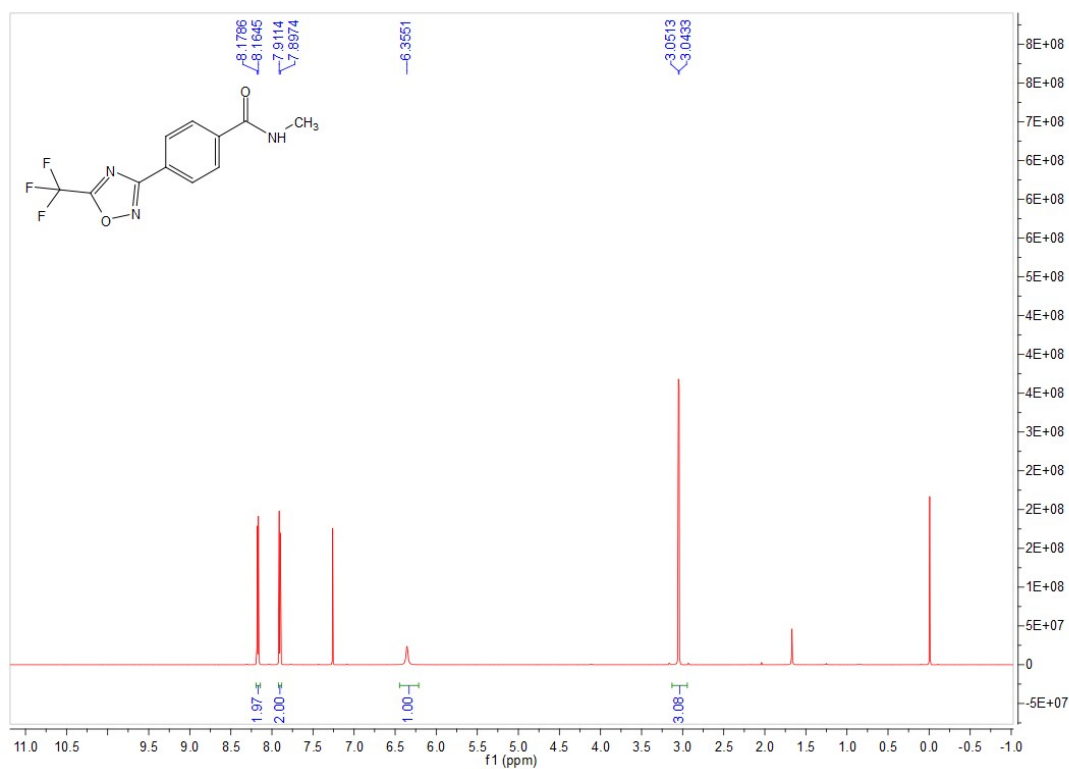

### <sup>13</sup>C NMR of N-methyl-4-(5-(trifluoromethyl)-1,2,4-oxadiazol-3-yl)benzamide (3as)

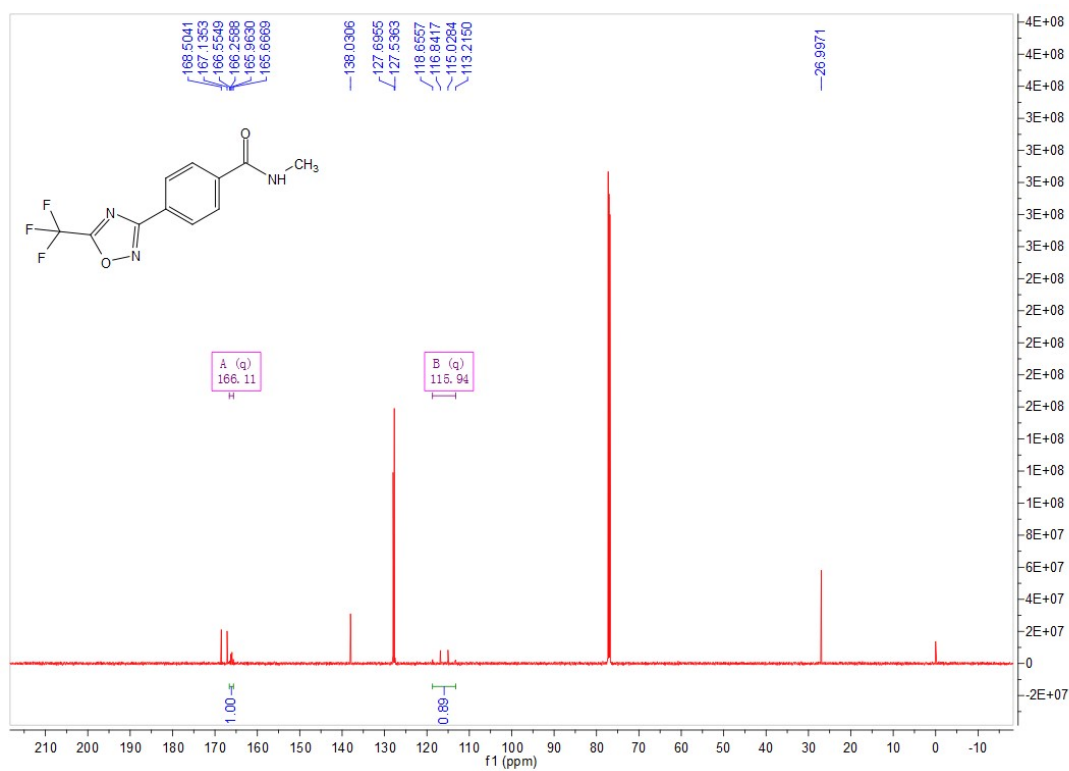

### <sup>1</sup>H NMR of 2-methyl-1,2-dihydroisoquinolin-3(4H)-one (4a)

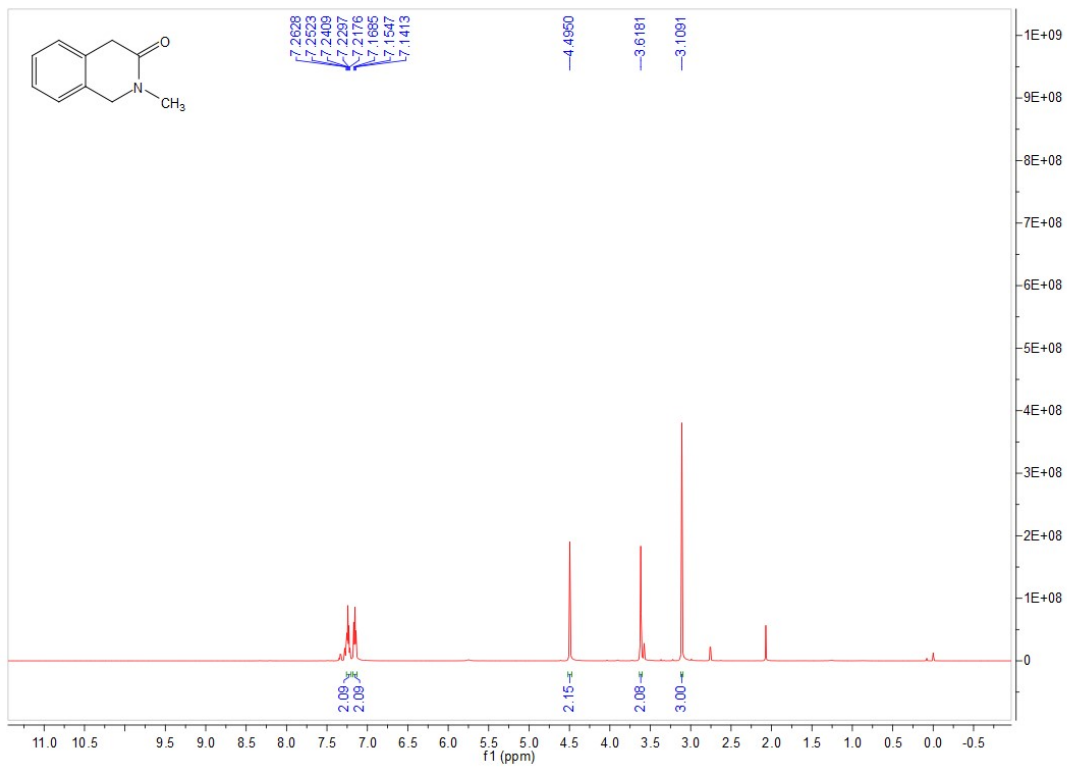

**<sup>13</sup>C NMR of 2-methyl-1,2-dihydroisoquinolin-3(4H)-one (4a)**

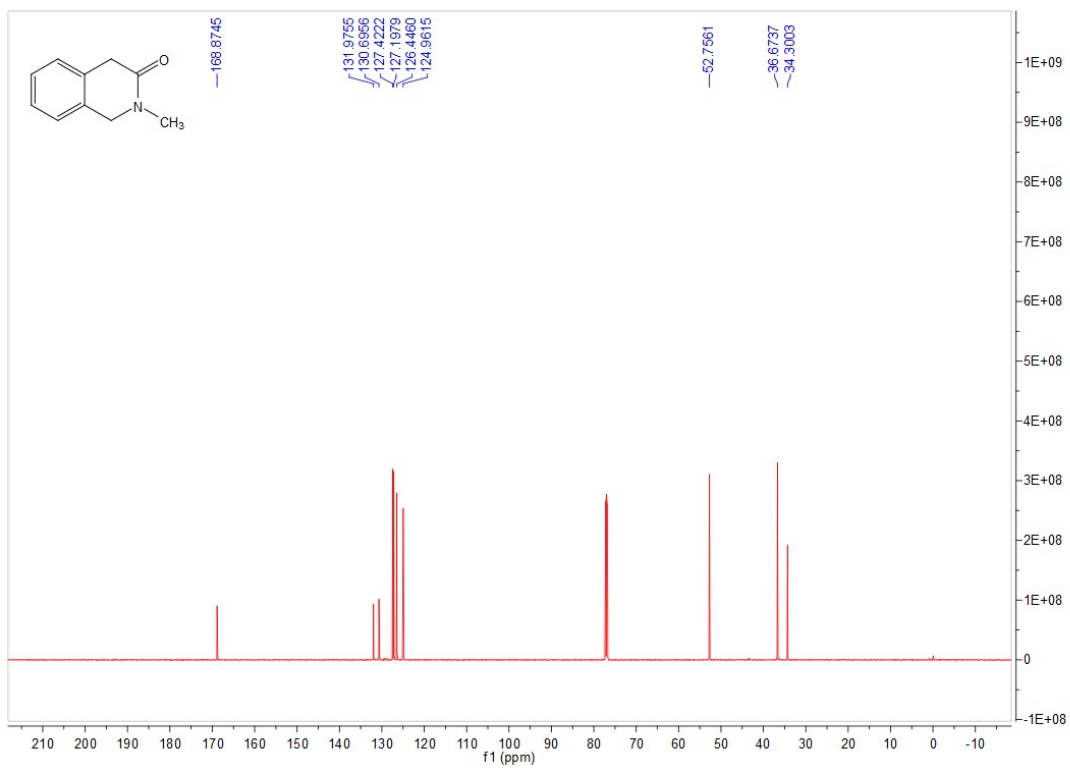

Supplement: d2ra03255d1.pdf [file d2ra03255d1.pdf]
